# Supplementary material for: Effectiveness of population-wide screening and mass drug administration for leprosy control in Kiribati: the COMBINE protocol
Source: PubMed Central journal article supplement — BMJ Open. 2023 Jun 29;13(6):e065369. doi: 10.1136/bmjopen-2022-065369 (PMC10314446; doi:10.1136/bmjopen-2022-065369), 2023-06-29
Supplement: bmjopen-2022-065369.draft_revisions.pdf [file bmjopen-2022-065369.draft_revisions.pdf]

# BMJ Open

BMJ Open is committed to open peer review. As part of this commitment we make the peer review history of every article we publish publicly available.

When an article is published we post the peer reviewers' comments and the authors' responses online. We also post the versions of the paper that were used during peer review. These are the versions that the peer review comments apply to.

The versions of the paper that follow are the versions that were submitted during the peer review process. They are not the versions of record or the final published versions. They should not be cited or distributed as the published version of this manuscript.

BMJ Open is an open access journal and the full, final, typeset and author-corrected version of record of the manuscript is available on our site with no access controls, subscription charges or pay-per-view fees (<http://bmjopen.bmj.com>).

If you have any questions on BMJ Open's open peer review process please email [info.bmjopen@bmj.com](mailto:info.bmjopen@bmj.com)

# BMJ Open

## Mass drug administration for leprosy control in Kiribati: The COMBINE protocol

|                               |                                                                                                                                                                                                                                                                                                                                                                                                                                                                                                                                                                                                                                                                                                                                                                                                                                                                                                                                                                                                                                                                                                                                                                                                                                                                                                                                                                                                                                                                                                                                                                                                                                                                                                                                                                                                |
|-------------------------------|------------------------------------------------------------------------------------------------------------------------------------------------------------------------------------------------------------------------------------------------------------------------------------------------------------------------------------------------------------------------------------------------------------------------------------------------------------------------------------------------------------------------------------------------------------------------------------------------------------------------------------------------------------------------------------------------------------------------------------------------------------------------------------------------------------------------------------------------------------------------------------------------------------------------------------------------------------------------------------------------------------------------------------------------------------------------------------------------------------------------------------------------------------------------------------------------------------------------------------------------------------------------------------------------------------------------------------------------------------------------------------------------------------------------------------------------------------------------------------------------------------------------------------------------------------------------------------------------------------------------------------------------------------------------------------------------------------------------------------------------------------------------------------------------|
| Journal:                      | <i>BMJ Open</i>                                                                                                                                                                                                                                                                                                                                                                                                                                                                                                                                                                                                                                                                                                                                                                                                                                                                                                                                                                                                                                                                                                                                                                                                                                                                                                                                                                                                                                                                                                                                                                                                                                                                                                                                                                                |
| Manuscript ID                 | bmjopen-2022-065369                                                                                                                                                                                                                                                                                                                                                                                                                                                                                                                                                                                                                                                                                                                                                                                                                                                                                                                                                                                                                                                                                                                                                                                                                                                                                                                                                                                                                                                                                                                                                                                                                                                                                                                                                                            |
| Article Type:                 | Protocol                                                                                                                                                                                                                                                                                                                                                                                                                                                                                                                                                                                                                                                                                                                                                                                                                                                                                                                                                                                                                                                                                                                                                                                                                                                                                                                                                                                                                                                                                                                                                                                                                                                                                                                                                                                       |
| Date Submitted by the Author: | 06-Jun-2022                                                                                                                                                                                                                                                                                                                                                                                                                                                                                                                                                                                                                                                                                                                                                                                                                                                                                                                                                                                                                                                                                                                                                                                                                                                                                                                                                                                                                                                                                                                                                                                                                                                                                                                                                                                    |
| Complete List of Authors:     | <p>Coleman, Mikaela; The University of Sydney, Faculty of Medicine and Health; The Centenary Institute at the University of Sydney, Tuberculosis Research Program</p> <p>Hill, Jeremy; The University of Sydney, Faculty of Medicine and Health; The Centenary Institute at the University of Sydney, Tuberculosis Research Program</p> <p>Timeon, Eretii; Government of the Republic of Kiribati Ministry of Health and Medical Services</p> <p>Rimon, Erei; Government of the Republic of Kiribati Ministry of Health and Medical Services</p> <p>Bauro, Temea; Government of the Republic of Kiribati Ministry of Health and Medical Services</p> <p>Ioteba, Nabura; Pasifika Futures Ltd; Pacific Leprosy Foundation</p> <p>Cunanan, Arturo; Pacific Leprosy Foundation; Culion Sanatorium and General Hospital</p> <p>Douglas, Nicholas M; Christchurch Hospital, Department of Infectious Diseases; University of Otago, Department of Medicine</p> <p>Islam, Tauhid; Division of Programmes for Disease Control</p> <p>Tomlinson, Jill; Pacific Leprosy Foundation</p> <p>Campbell, Patrick O; Christchurch Hospital, Department of Infectious Diseases</p> <p>Williman, Jonathan; Christchurch School of Medicine and Health Sciences, Public Health and General Practice</p> <p>Priest, Patricia; University of Otago</p> <p>Marais, B; University of Sydney, Faculty of Medicine and Health; The University of Sydney Institute for Infectious Diseases</p> <p>Britton, Warwick; The Centenary Institute at the University of Sydney, Tuberculosis Research Program; Royal Prince Alfred Hospital, Department of Clinical Immunology</p> <p>Chambers, Stephen; The Pacific Leprosy Foundation; University of Otago Christchurch, Department of Pathology and Biomedical Science,</p> |
| Keywords:                     | Tropical medicine < INFECTIOUS DISEASES, Public health < INFECTIOUS DISEASES, Tuberculosis < INFECTIOUS DISEASES, Epidemiology < INFECTIOUS DISEASES, EPIDEMIOLOGY                                                                                                                                                                                                                                                                                                                                                                                                                                                                                                                                                                                                                                                                                                                                                                                                                                                                                                                                                                                                                                                                                                                                                                                                                                                                                                                                                                                                                                                                                                                                                                                                                             |
|                               |                                                                                                                                                                                                                                                                                                                                                                                                                                                                                                                                                                                                                                                                                                                                                                                                                                                                                                                                                                                                                                                                                                                                                                                                                                                                                                                                                                                                                                                                                                                                                                                                                                                                                                                                                                                                |

1  
2  
3  
4  
5  
6  
7  
8  
9  
10  
11  
12  
13  
14  
15  
16  
17  
18  
19  
20  
21  
22  
23  
24  
25  
26  
27  
28  
29  
30  
31  
32  
33  
34  
35  
36  
37  
38  
39  
40  
41  
42  
43  
44  
45  
46  
47  
48  
49  
50  
51  
52  
53  
54  
55  
56  
57  
58  
59  
60

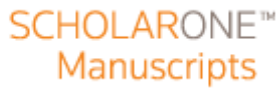

**TITLE**

Mass drug administration for leprosy control in Kiribati: The COMBINE protocol

**AUTHORS**

Mikaela Coleman<sup>1,2\*</sup>, Jeremy Hill<sup>1,2\*</sup>, Eretii Timeon<sup>3</sup>, Erei Rimon<sup>3</sup>, Temea Bauro<sup>3</sup>, Nabura Ioteba<sup>4,5</sup>, Arturo Cunanan<sup>5,6</sup>, Nicholas M Douglas<sup>7,8,9</sup>, Tauhid Islam<sup>10</sup>, Jill Tomlinson<sup>5</sup>, Patrick O Campbell<sup>7</sup>, Jonathan Williman<sup>8</sup>, Patricia Priest<sup>11</sup>, Ben J Marais<sup>1,12</sup>, Warwick J Britton<sup>1,2,13</sup>, Stephen T Chambers<sup>5,14</sup>

**CORRESPONDING AUTHORS**

\*Dr Mikaela Coleman

Room 5.17, The Centenary Institute,

The University of Sydney

Camperdown, 2050

New South Wales, Australia

Phone: +61 411 419 047

Email: mikaela.coleman@sydney.edu.au

\*Dr Jeremy Hill

Room 5.17, The Centenary Institute,

The University of Sydney

Camperdown, 2050

New South Wales, Australia

Phone: +61 402 544 252

Email: jeremy.hill@sydney.edu.au

**AUTHOR AFFILIATIONS**

1 - Faculty of Medicine and Health, The University of Sydney, Sydney, New South Wales, Australia

2 - Tuberculosis Research Program at the Centenary Institute, The University of Sydney, Sydney, New South Wales, Australia

3 - Ministry of Health and Medical Services, Tarawa, Kiribati

- 1  
2  
3 4 – Pasifika Futures Ltd, Etu Pasifika Christchurch, New Zealand  
4  
5 5 - Pacific Leprosy Foundation, Christchurch, New Zealand  
6  
7 6 – Culion Sanatorium and General Hospital, Culion, Philippines  
8  
9 7 – Department of Infectious Diseases, Christchurch Hospital, Christchurch, New Zealand  
10  
11 8 – Department of Medicine, University of Otago, Christchurch, New Zealand  
12  
13 9 – Division of Global and Tropical Health, Menzies School of Health Research, Charles Darwin  
14 University, Darwin, Australia  
15  
16 10 - End TB and Leprosy Unit, Division of Programmes for Disease Control, WHO Regional Office for  
17 the Western Pacific, Manila, Philippines  
18  
19 11 – Department of Epidemiology and Public Health, The University of Otago, Dunedin  
20 Dunedin, New Zealand.  
21  
22 12 - The University of Sydney Institute for Infectious Diseases, Sydney, New South Wales, Australia.  
23  
24 13 - Department of Clinical Immunology, Royal Prince Alfred Hospital, Camperdown, New South  
25 Wales, Australia  
26  
27 14 – Department of Pathology and Biomedical Science, The University of Otago, Christchurch, New  
28 Zealand  
29  
30  
31  
32  
33  
34

35 **WORD COUNT:**

36 Abstract: **299**

37 Strengths and limitations: **115**

38 Main text: **3702**

39 Contact, Acknowledgements, Funding: **236**

40 References: **30**

41 Tables: **3**

42 Figures: **1**

43 Supplement: **2**

44 **KEYWORDS:**

45 leprosy; Hansen's disease; mass drug administration; MDA; population; contacts;  
46 prevention; prophylaxis; single-dose rifampicin; SDR; intervention; post-exposure  
47  
48  
49  
50  
51  
52  
53  
54  
55  
56  
57  
58  
59  
60

1  
2 prophylaxis; PEP; active case finding; ACF; universal leprosy prophylaxis; mass  
3  
4 chemoprophylaxis; rifapentine; Pacific; Kiribati  
5  
6  
7

8  
9 **PROTOCOL VERSION:**

10  
11 1  
12  
13  
14  
15  
16  
17  
18  
19  
20  
21  
22  
23  
24  
25  
26  
27  
28  
29  
30  
31  
32  
33  
34  
35  
36  
37  
38  
39  
40  
41  
42  
43  
44  
45  
46  
47  
48  
49  
50  
51  
52  
53  
54  
55  
56  
57  
58  
59  
60

For peer review only

## ABSTRACT

Progress towards leprosy elimination is threatened by increasing incidence in 'hot-spot' areas where more effective control strategies are urgently required. In these areas, active case finding and leprosy prevention limited to known contacts is insufficient for control. Population-wide active case-finding together with universal prevention through mass drug administration (MDA) has been shown to be effective in 'hot-spot' areas, but is logistically challenging and expensive. Combining leprosy screening and MDA with other population-wide screening activities such as for tuberculosis (TB) may increase programme efficiency. There has been limited evaluation of the feasibility and effectiveness of combined screening and MDA interventions. The COMBINE study aims to bridge this knowledge gap.

### Methods and analysis

This implementation study will assess the feasibility and effectiveness of active leprosy case-finding and treatment, combined with population-wide MDA using either single-dose rifampicin or rifamycin-containing TB preventive or curative treatment, for reducing leprosy incidence in Kiribati. The leprosy programme will run over 2022–2025 in concert with the PEARL population-wide TB screening and treatment study in South Tarawa. The primary research question is to what extent the intervention reduces the annual leprosy new case detection rate (NCDR) compared to routine screening and post exposure prophylaxis (PEP) among close contacts (baseline leprosy control activities). Comparisons will be made with 1) the pre-intervention NCDR in South Tarawa (before-after study) and 2) the NCDR in the rest of the country. Additionally, the post-intervention prevalence of leprosy obtained from a survey of a 'hot-spot' sub-population will be compared to prevalence documented during the intervention. The intervention will be implemented in collaboration with the Kiribati National Leprosy Program (NLP).

### Ethics and dissemination

1  
2 Approval has been obtained from relevant ethics committees. Findings will be shared with the  
3  
4 Kiribati Ministry of Health and Medical Services, local communities and internationally through  
5  
6 publication in peer-reviewed journals.  
7  
8  
9  
10  
11  
12  
13  
14  
15  
16  
17  
18  
19  
20  
21  
22  
23  
24  
25  
26  
27  
28  
29  
30  
31  
32  
33  
34  
35  
36  
37  
38  
39  
40  
41  
42  
43  
44  
45  
46  
47  
48  
49  
50  
51  
52  
53  
54  
55  
56  
57  
58  
59  
60

For peer review only



### Strengths and limitations of this study

- Designed for both rapid and sustained reduction in leprosy prevalence using a combination of active case-finding with treatment and mass drug administration for population-wide chemoprophylaxis
- Geographically isolated island with high rates of leprosy, relatively small population and limited population mobility, facilitating proof-of-principle testing with low risk of dilution of intervention effect
- Dovetailing of existing leprosy and TB elimination activities reduces disruption to routine practice and maximises efficiency
- The absence of randomisation limits attribution of effect to the intervention; partially compensated for by employing multiple comparator assessments
- Despite the geographic isolation, the long implementation period (3 years) may allow leprosy re-infection events to occur in the community through inter-island travel

## INTRODUCTION

Since the 1991 World Health Association resolution to eliminate leprosy,<sup>1</sup> tremendous progress has been made towards global leprosy elimination.<sup>2</sup> However, despite enhanced early detection and availability of effective treatment and prevention options, progress has reversed in some leprosy 'hot-spots' (regions of high leprosy endemicity).<sup>3</sup> National leprosy disease and disability rates have stagnated in most of the 23 leprosy global priority countries with an increase in grade-2 disability reported in 2020 for 7 of these countries, including Kiribati.<sup>3</sup> Global de-funding for leprosy control and health system prioritisation of diseases with more obvious and immediate clinical presentations than leprosy have exacerbated these challenges. Point prevalence surveys in leprosy endemic regions reveal many undetected cases, with major case detection and reporting gaps responsible for the 'missing millions'.<sup>4-10</sup> Although the relatively low incidence of childhood leprosy (6.8% of all newly detected cases) indicates that transmission has declined globally, this is not true in all areas with cases among children increasing in some countries.<sup>3</sup>

The ongoing leprosy disease burden in the Pacific Island nation of Kiribati is emblematic of the global situation in high burden countries. Kiribati has one of the highest leprosy incidence rates in the world and these rates are on the rise; the Ministry of Health and Medical Services (MHMS) reports a 17% increase in incidence from 2010 to 2020, with 15.9 new cases detected per 10,000 people in 2020.<sup>3</sup> Curative and preventive services are routinely provided by the National Leprosy Program (NLP) in line with World Health Organization (WHO) guidelines, in partnership with the Pacific Leprosy Foundation (PLF). The NLP screens contacts for leprosy and, if active leprosy is not identified, provides single-dose rifampicin for post-exposure prophylaxis (SDR-PEP) immediately and one year later. In addition, contacts are screened for signs and symptoms of leprosy annually for four more years after the initial screening. SDR-PEP was introduced in 2018 and has since been provided to 89% of all eligible leprosy contacts recorded since 2010, which amounts to screening and prophylaxis for ~9% of the total population of Kiribati (10,406 contacts). Despite these interventions, most new leprosy

1  
2 cases in Kiribati are detected passively rather than by contact tracing with many presenting  
3 with advanced disease; almost half of all cases have multibacillary disease. These cases have  
4 long infectious periods before diagnosis and are an important source of transmission in the  
5 community.  
6  
7  
8  
9

10  
11  
12  
13 To make an impact on the leprosy epidemic in Kiribati and to meet the ambitious Zero Leprosy  
14 target to halve global leprosy incidence by 2030,<sup>11</sup> bold new strategies are needed. Such  
15 strategies should be designed to break the chain of leprosy transmission and to reduce the  
16 risk of disease progression in highly endemic regions. One avenue for exploration is to expand  
17 the reach of active case-finding (ACF) and preventive interventions in high-risk populations.  
18 In previous studies, regions with smaller populations, but similar disease burdens to Kiribati,  
19 have benefitted from population wide ACF and mass drug administration (MDA) with SDR to  
20 reduce the risk of progression to leprosy disease in the community, irrespective of contact  
21 status.<sup>12 13</sup> Population-wide programmes can be very challenging to implement on a large  
22 scale because of the logistical demands of reaching whole populations, difficulties achieving  
23 acceptability and buy-in, poor access to microbial confirmation in resourced-limited settings,  
24 a lack of clinical expertise for diagnoses, and challenges in mobilising resources to support  
25 population-wide programmes. The result is that leprosy MDA for large populations (>5,000  
26 people) is often considered unfeasible in the regions where it is most needed.  
27  
28  
29  
30  
31  
32  
33  
34  
35  
36  
37  
38  
39  
40  
41  
42  
43  
44

45 Twenty-one of the 23 leprosy priority countries also have endemic tuberculosis (TB).<sup>3</sup> The  
46 relatively greater funding for TB and the global movement towards expanded ACF for TB,<sup>14-16</sup>  
47 the shared susceptibility of *Mycobacterium leprae* and *Mycobacterium tuberculosis* to  
48 rifamycins for preventive therapy, and the similar social determinants of transmission and  
49 disease all present opportunities for leprosy control programs to leverage TB programmes for  
50 mutual gain. Where the burden of both diseases is sufficiently high, this can take the form of  
51 combined population wide ACF and MDA chemoprophylaxis activities. In South Tarawa, the  
52 PEARL study<sup>17</sup> provides the mechanism by which a combined intervention may be delivered  
53  
54  
55  
56  
57  
58  
59  
60

1  
2  
3 at a fraction of the cost of a separate programme. Modelling of a mass chemoprophylaxis  
4 strategy for leprosy suggests this is an effective strategy,<sup>18</sup> and combining mass screening  
5 and treatment for TB are expected to greatly increase efficiency and cost-effectiveness. South  
6  
7 Tarawa was chosen for the PEARL study as it is the centre with the highest population density  
8  
9 in Kiribati and has the highest estimated incidence of TB and leprosy.  
10  
11  
12  
13  
14

15 The COMBINE study is designed to inform programmatic strategies towards leprosy  
16 elimination in the Pacific and elsewhere. We aim to assess the effectiveness, feasibility,  
17 efficiency and cost of a programme of leprosy screening and mass rifamycin-based  
18 chemoprophylaxis delivered in combination with a TB screening, treatment and prevention  
19 initiative in Kiribati.<sup>17</sup> We will provide evidence for practicable means of integrating leprosy  
20 control with other communicable disease programmes that can be used to effectively  
21 accelerate leprosy prevention and care in endemic regions. Many of the research questions  
22 addressed by the COMBINE study must be answered to achieve scalable and durable leprosy  
23 elimination in countries like Kiribati.  
24  
25  
26  
27  
28  
29  
30  
31  
32  
33  
34  
35  
36  
37  
38  
39  
40  
41  
42  
43  
44  
45  
46  
47  
48  
49  
50  
51  
52  
53  
54  
55  
56  
57  
58  
59  
60

## OBJECTIVES

The COMBINE study assesses the feasibility and effectiveness of leprosy screening and MDA chemoprophylaxis in a highly endemic population using a programmatic approach that:

- Investigates whether combined population-wide screening and treatment for leprosy and TB together with MDA chemoprophylaxis and ongoing SDR-PEP for contacts can achieve rapid and durable reductions in leprosy incidence;
- Evaluates the effectiveness of leprosy MDA chemoprophylaxis using a pragmatic combination of either SDR or rifamycin-based TB preventive treatment;
- Measures the cost of MDA delivery when integrated with infrastructure from an existing population-wide screening program (the PEARL study<sup>17</sup>);
- Documents operational strategies to feasibly integrate enhanced leprosy and TB control efforts, and to reduce leprosy associated stigma.

## METHODS AND ANALYSIS

### Study design

COMBINE is a pragmatic controlled non-randomised before-and-after implementation study designed to evaluate the impact of the intervention upon leprosy NCDR. The COMBINE study will leverage infrastructure created by the PEARL study to deliver population-wide leprosy ACF and chemoprophylaxis. We will deliver the intervention over 3 years, aiming to reach the entire population of South Tarawa in that time.

### Setting

The Republic of Kiribati is a geographically isolated nation in the Pacific region comprising 32 atolls and one raised coral island spread over a land territory of 811 km<sup>2</sup> amid an ocean territory of 3.5 million km<sup>2</sup>. The intervention site is the capital atoll of South Tarawa (population 63,439) which is the densely-populated 'transmission hot-spot' and amplifier of leprosy disease throughout the country (see **Table 1** for baseline characteristics of the study population).<sup>19</sup> Kiribati has only one specialised leprosy clinic which is located in South Tarawa.

Residents live in village communities on a chain of low-lying islets connected by a causeway. Visitors from 'outer islands' to the capital often stay for an extended period. Anecdotally, this pattern of travel in and out of South Tarawa is associated with clusters of TB and leprosy in outer island communities.

While diagnosis and contact-tracing practices have been improved and standardised since 2010, it is uncertain whether the upward trend in new case detection rate (NCDR) in Kiribati over the past decade is an accurate measure of worsening epidemic control or reflective of enhanced case detection. What is clear, is that child NCDR has exceeded 30% of all newly detected cases for the past 3-years (2019-2021), indicating that the background community-level leprosy transmission has outpaced the potential to control the disease burden with existing leprosy programme interventions.

**Table 1.** Baseline characteristics of the population and intervention group

|                                                     | <b>Intervention group</b><br><i>South Tarawa</i> | <b>No intervention group</b><br><i>Rest of Kiribati</i> | <b>Whole of Kiribati</b> |
|-----------------------------------------------------|--------------------------------------------------|---------------------------------------------------------|--------------------------|
| <b>Population, 2020 *</b>                           | 63,439                                           | 56,501                                                  | 119,940                  |
| - <b>Females (%)</b>                                | 32,981 (52.0%)                                   | 27,805 (49.2%)                                          | 60,786 (50.7%)           |
| - <b>Median age (years)</b>                         | 23.2                                             | 22.3                                                    | 22.9                     |
| - <b>Average household size (people)</b>            | 6.6                                              | 4.9                                                     | 5.0                      |
| - <b>Net migration rate (% of population)</b>       | 2%                                               | 0.7%                                                    | 1.4%                     |
| <b>Urbanisation</b>                                 | Majority urban;<br>some rural                    | Majority rural;<br>some urban                           | Mixed urban and rural    |
| <b>BCG coverage, 2021 (% of live births) **</b>     | 2434/2525 (96.4%)                                | 839/888 (94.5%)                                         | 3273/3413 (95.9%)        |
| <b>Leprosy new cases, 2020 (rate per 10,000) **</b> | 93 (14.44)                                       | 62 (11.15)                                              | 155 (12.92)              |
| - <b>Child cases (%)</b>                            | 18 (19.4%)                                       | 18 (29.0%)                                              | 36 (23.2%)               |
| - <b>MB cases (%)</b>                               | 50 (53.8%)                                       | 20 (32.3%)                                              | 70 (45.2%)               |
| <b>Eligible contacts 2010–2020 **</b>               | 9527                                             | 2264                                                    | 11,811                   |
| - <b>received SDR (%)</b>                           | 8381 (88%)                                       | 2021 (89%)                                              | 10,402 (89%)             |

1  
2  
3 Selected baseline characteristics or populations in the intervention area (South Tarawa), no  
4 intervention area (rest of Kiribati) and for the whole of Kiribati. BCG – Bacille Calmette-  
5  
6 Guerin; MB – multibacillary; SDR – single-dose rifampicin.

7  
8  
9 \* *National Statistics Office, 2020 census data*

10  
11 \*\* *Ministry of Health and Medical Services, programme data*

## 12 13 14 15 **Intervention group and recruitment**

16  
17 The intervention group comprises residents of South Tarawa (and the small communities of  
18 Buota and Abatao adjacent to South Tarawa) aged 3-years and above, and aged less than 3-  
19 years if they have documented household contact (relevant definitions are provided in **Box 1**)  
20  
21 with someone who has had TB in the past 1 year, or leprosy at any time since they were born.  
22  
23 Study participants will be identified via household and village-level lists of residents from the  
24  
25 2020 census, and then invited to attend screening locations using door-to-door visits at  
26  
27 households and community-based institutions (businesses, churches, et cetera). Basic  
28  
29 demographic, social and geographic data will be collected at enrolment by the PEARL study  
30  
31 screening teams.  
32  
33  
34  
35  
36  
37  
38

### 39 **Box 1. Definitions**

40  
41 **Case of leprosy** – clinical definition classified as multibacillary (MB) or paucibacillary (PB)  
42 according to WHO criteria that has been diagnosed by the doctor of the NLP.

43  
44  
45 **Household** - all those using the same kitchen, including members of extended families, the  
46  
47 Maneaba (communal hospitality shelters), and dormitories in individual locations.

48  
49 **Household contact** - any person who has been in contact with a new leprosy case for at least  
50  
51 20 hours per week for at least three months during the past five years.\*

52  
53  
54 \**adapted from WHO definition for the Kiribati context*

## 55 56 57 58 59 **Interventions**

1  
2  
3 An illustration of the combined TB and leprosy interventions is provided in **Figure 1**, comparing  
4 the intervention group and standard care in the comparison group. Interventions are described  
5 in detail below. In practice, these interventions will be delivered in the setting of a combined  
6  
7 community-based screening, diagnosis, treatment and prevention service.  
8  
9

### 10 11 12 13 *Case detection, diagnosis and treatment*

14  
15 Screening for leprosy will be conducted by a physical examination and questionnaire  
16  
17 (**Supplement 1**). People with presumptive leprosy will be referred to the National Leprosy  
18  
19 Program (NLP) for expert diagnosis. Cases will be validated by a leprologist and skin biopsies  
20  
21 from all patients with clinically diagnosed leprosy will be tested by PCR for *M. leprae* and drug  
22  
23 resistance mutations, according to WHO guidelines.<sup>14</sup> Leprosy treatment will be provided by  
24  
25 the NLP according to Kiribati national guidelines. Further details of the leprosy screening,  
26  
27 diagnosis and treatment eligibility criteria are available in the PEARL study protocol.<sup>17</sup>  
28  
29  
30

### 31 32 *Contact Tracing and Post-Exposure Prophylaxis*

33  
34 Contact tracing and SDR-PEP will be ongoing for all index cases identified during the  
35  
36 intervention within the study site and throughout the rest of Kiribati, as is consistent with routine  
37  
38 practice (**Box 1**). WHO recommends that leprosy contacts should be given SDR-PEP at  $\geq 2$   
39  
40 years of age.<sup>20</sup> This has been adopted by the Kiribati NLP since 2018 and will be supported  
41  
42 by the COMBINE study to scale-up SDR-PEP delivery throughout the intervention period, as  
43  
44 enhanced index case detection will increase contact tracing needs. Children who are younger  
45  
46 than 2-years and are leprosy contacts will be followed up and offered SDR-PEP by the NLP  
47  
48 when they reach 2 years of age.  
49  
50  
51

### 52 53 *Leprosy Mass Drug Administration Chemoprophylaxis*

54  
55 Rifamycin-based MDA chemoprophylaxis is provided using a composite of treatments. After  
56  
57 integrated leprosy and TB screening, participants will be commenced on treatment for TB,  
58  
59 treatment for leprosy, or TPT using a rifamycin-based regimen, depending on the screening  
60



outcome. For participants who are not eligible for any of those treatments, we will then offer a single dose of rifampicin according to the inclusion/exclusion criteria in **Table 2**. Considered together as in **Table 3**, all participants will be offered a rifamycin-based treatment; effectively a rifamycin-based leprosy MDA chemoprophylaxis. Detailed dosing information is provided in **Supplement 2**.

**Table 2.** Inclusion and exclusion criteria for single dose rifampicin

| Inclusion criteria                                                                                                                                            | Exclusion criteria                                                          |
|---------------------------------------------------------------------------------------------------------------------------------------------------------------|-----------------------------------------------------------------------------|
| 1. Enrolled in the screening intervention                                                                                                                     | 1. History of serious liver or kidney disease.                              |
| 2. Not eligible for any other rifamycin-based treatment                                                                                                       | 2. Known pregnancy (SDR can be given after delivery).                       |
| 3. Aged $\geq 2$ years                                                                                                                                        | 3. Known allergy or severe adverse effects experienced with rifampicin use. |
| 4. Informed consent. For children (<18 years) consent will be obtained from the parent or guardian, and children ( $\geq 10$ years) will also provide assent. | 4. Refuses participation.                                                   |

Inclusion criteria are shown for single dose rifampicin. Other treatment regimens are determined by indications and contraindications relevant to those regimens. MDA – mass drug administration; SDR – single-dose rifampicin.

**Table 3.** Overview of combined treatment and chemoprophylaxis

| Screening outcome | Treatment offered     | Rifamycin component                                 |
|-------------------|-----------------------|-----------------------------------------------------|
| Leprosy           | Leprosy MDT           | Monthly rifampicin for 6-12 months                  |
| TB                | TB treatment          | Daily rifampicin for 6-12 months                    |
| RR-TB             | DR-TB treatment + SDR | Single dose rifampicin                              |
| Eligible for TPT  | 3HP or 3RH            | Weekly rifapentine or daily rifampicin for 3 months |
| Leprosy HHC       | SDR-PEP               | Rifampicin given at baseline and one year later     |
| None of the above | SDR-MDA               | Single dose of rifampicin                           |

Screening outcomes are exhaustive but not mutually exclusive. The rifamycin component of each treatment strategy includes sufficient exposure to offer prevention for leprosy, in effect a mass drug administration of leprosy chemoprophylaxis. 3HP – 3-months of weekly rifapentine

1  
2 and isoniazid; 3RH – 3-months of daily rifampicin and isoniazid; DR-TB – drug-resistant  
3 tuberculosis; HHC – household contact; MDA – mass drug administration; MDT – multi-drug  
4 treatment; NLP – national leprosy program; PCR – polymerase chain reaction; PEP – post-  
5 exposure prophylaxis; RR-TB – rifampicin-resistant tuberculosis; SDR – single-dose  
6 rifampicin; TB – tuberculosis; TPT – tuberculosis preventive treatment.  
7  
8  
9  
10  
11  
12  
13  
14  
15  
16

### 17 *Community Engagement and Stigma Prevention*

18 The objective of community engagement and mass communications is to encourage  
19 participation in the screening programme and sensitise community members to appropriate,  
20 non-stigmatising messages related to leprosy and leprosy screening. This approach is  
21 supported by the best practice statement of the Global Partnership for Zero Leprosy.<sup>11 21</sup> The  
22 COMBINE study supports community engagement and stigma prevention through various  
23 activities developed in concert with the PLF (who have 10 years of experience in leprosy  
24 advocacy in Kiribati) and the MHMS. These activities include:  
25  
26  
27  
28  
29  
30  
31  
32

- 33 • bi-annual advocacy activity drives which may include leprosy awareness parades,  
34 plays, signage and mass communication.
- 35 • convening of a leprosy community support group for patients diagnosed with leprosy  
36 and their close contacts/families. COMBINE nurses will assist with mentoring the  
37 community group, training in coping strategies and supporting activities.
- 38 • annual training and development workshops including all staff of the national leprosy  
39 and TB programmes with anti-stigma training for health staff delivering the COMBINE  
40 screening intervention
- 41 • job-aids and resources to support health staff and people with leprosy, for example a  
42 flipbook to aid counselling sessions between health workers and people with leprosy  
43  
44  
45  
46  
47  
48  
49  
50  
51  
52  
53  
54  
55  
56

### 57 *Post-intervention prevalence survey*

1  
2  
3 A follow-up leprosy prevalence survey will be conducted in Betio islet (~18,500 people, located  
4 within the South Tarawa intervention group) 3-4 years after the intervention there has been  
5 completed.  
6  
7  
8  
9

## 10 11 **Outcome measures and planned analyses**

12  
13 The primary research question of interest is the extent to which the intervention reduces  
14 leprosy annual NCDR compared with standard routine passive case-finding and post-  
15 exposure prophylaxis of close contacts. This will be assessed 1) by comparing the post-  
16 intervention NCDR in South Tarawa (in 2025) with the pre-intervention NCDR (in 2021) and  
17 2) by comparing the change in NCDR in South Tarawa (the intervention site) with the change  
18 in NCDR observed in the outer Kiribati islands (non-intervention sites). A supplementary  
19 analysis will examine the number of new cases detected by a house-to-house prevalence  
20 survey in Betio (~15,000 people) performed 3-4 years after initial study screening (2026), to  
21 determine the effect of the COMBINE intervention upon leprosy prevalence.  
22  
23  
24  
25  
26  
27  
28  
29  
30  
31  
32  
33

34 Due to the long latency of leprosy, we expect that the full effect of the intervention will only  
35 become apparent after several years have elapsed. The study sponsor, the PLF, is committed  
36 to continuing leprosy surveillance in Kiribati, enabling ongoing assessments of long-term  
37 trends in incidence beyond 2025.  
38  
39  
40  
41  
42  
43  
44

45 Other planned analyses will examine:

- 46 1. The diagnostic yield of screening and spectrum of leprosy disease in different  
47 communities/islands in Kiribati
- 48 2. Geospatial and social relationships between leprosy cases based on Global Positioning  
49 System (GPS) co-ordinates and social contact mapping
- 50 3. Prevalence of genotypic *M. leprae* resistance to rifampicin, dapsone and clofazimine  
51 before and after the MDA programme (using PCR-based assays of skin biopsies) <sup>22-25</sup>  
52  
53  
54  
55  
56  
57  
58  
59  
60

4. The costs of leprosy-only activities, TB-only activities and shared activities to inform the cost-efficiency of future combined leprosy elimination projects in the Pacific and elsewhere
5. The impact of prior exposure to rifamycins (provided as part of routine activities of the NLP and NTP) on risk of leprosy diagnosis in a high-incidence setting
6. The feasibility of combined TB and leprosy elimination efforts in the intervention site based on health service requirements (health care worker mix and person-time), together with infrastructure requirements and qualitative acceptability among decision makers and participants/communities
7. Mathematical modelling of the dynamics of leprosy incidence using 'real life' data from the COMBINE study with the aim of refining previous models<sup>18</sup> to improve accuracy of forecasting and decision support

### Sample size

Assuming mass chemoprophylaxis coverage of 80% of the population and given a leprosy NCDR of 1600/1,000,000 for South Tarawa (the intervention group, population ~65,000) and 872 per 1,000,000 for the rest of the country (comparison group, population ~55,000), the study would provide greater than 99% power ( $\alpha < 0.05\%$ ) to detect a 50% reduction (before versus after difference) in NCDR in South Tarawa (the intervention group) and 82% power to detect a 50% reduction in South Tarawa compared with no change in the rest of the country. Predicted sample sizes were calculated using the mean number of cases observed between 2018 and 2020 and simulated number of cases observed in 2025, drawn from a Poisson distribution (10,000 replicates) according to the parameters above and assuming a population growth of 5,000 in each area.

### Economic Analysis and Costing

COMBINE proposes to estimate unit costs for screening per patient, working closely with the PEARL study to perform a cost analysis of TB-only activities, leprosy-only activities and

1  
2 shared activities. Accurate costing data will inform future leprosy elimination projects in the  
3 Pacific region and beyond, and will have additional benefits for subsequent planning,  
4 budgeting and modelling exercises. To enhance the application of our findings, we will seek  
5 to align costing data with existing interagency costing tools.  
6  
7  
8  
9

### 10 11 12 13 **Data collection and monitoring**

14 All leprosy and TB screening, chemoprophylaxis and outcome data will be captured offline on  
15 encrypted tablet devices using Research Electronic Data Capture (REDCap) surveys. Data  
16 will be uploaded and stored on a high security REDCap database server managed by the  
17 University of Sydney. This database is interoperable with the existing NLP database, and  
18 leprosy data will be shared in real time with the NLP to conduct and record contact tracing  
19 activities in the NLP database, consistent with current standard procedure.  
20  
21  
22  
23  
24  
25  
26  
27  
28  
29

### 30 **ETHICS AND DISSEMINATION**

31 Ethics for the COMBINE study has been obtained from the University of Sydney (project no.  
32 2021/127) and the Kiribati Ministry of Health and Medical Services. Government support for  
33 the study to occur in collaboration with the NLP has been provided by Kiribati National Cabinet.  
34  
35  
36  
37  
38  
39

40 Participant information and counselling is provided to all prospective participants and again  
41 before treatment is offered (**Supplement 3**). Editable versions of study patient tools and a  
42 counselling flipbook are available at [www.leprosy.org.nz](http://www.leprosy.org.nz) and [www.thepearlstudy.org](http://www.thepearlstudy.org).  
43 Informed consent is gathered verbally before participant enrolment and a signed record of  
44 consent is collected in the study REDCap database (**Supplement 4**). Verbal consent for  
45 participants attending the NLP for confirmation of diagnosis and treatment management will  
46 be obtained according to standard programme practice. Written informed consent for a skin  
47 biopsy will be taken as is usual in the clinic. This includes consent to send the specimen  
48 abroad for analysis.  
49  
50  
51  
52  
53  
54  
55  
56  
57  
58  
59  
60

1  
2  
3 The safety of treatments for TB are discussed in the PEARL study protocol. SDR is very safe,  
4 and has been used in Kiribati<sup>18 19</sup> and elsewhere<sup>12 26-28</sup> with little or no recorded side-effects. A  
5 study hotline and walk-in clinic will be available for adverse event (AE) management  
6 throughout the study period. Information on the signs and symptoms of leprosy and  
7 instructions to access the permanent leprosy clinic are provided to all participants (including  
8 those who decline to participate). Serious AEs are reported in accordance with national and  
9 University of Sydney pharmacovigilance standards. Intervention monitoring and auditing  
10 procedures will be conducted annually by the MHMS in accordance with routine practice with  
11 study reports made annually to ethics and funding bodies.  
12  
13  
14  
15  
16  
17  
18  
19  
20  
21  
22

23 All study data will be shared with the MHMS. Reports of study progress will be made to the  
24 Kiribati community by mass communication and on the Pacific Leprosy Foundation and the  
25 PEARL study websites. Study findings will be presented at international conferences and in  
26 peer reviewed publications.  
27  
28  
29  
30  
31  
32  
33

#### 34 *Patient Involvement Statement*

35 This study was developed with the involvement of a reference group of I-Kiribati people  
36 affected by leprosy. This group will be involved in the COMBINE study in an ongoing basis. In  
37 particular, they will give advice concerning the practical implementation of the research,  
38 including the best ways of liaising with patients, their families and the community to ensure  
39 that communication is positive and does not contribute to stigma for people identified with  
40 leprosy and their contacts.  
41  
42  
43  
44  
45  
46  
47  
48  
49  
50

## 51 **DISCUSSION**

52 Innovative solutions are required to achieve progress towards leprosy elimination in Kiribati  
53 and in other areas of continuing high incidence. This is essential if we are to overcome the  
54 barriers to achieving global Zero Leprosy targets,<sup>11</sup> and eventually, true global leprosy  
55 elimination. As leprosy continues to require long and complex treatment programs, there is  
56  
57  
58  
59  
60

1  
2 also urgency to find novel control strategies before antibiotic resistance emerges and  
3 accelerates in high transmission populations.<sup>29</sup>  
4  
5  
6  
7

8  
9 The proposed study design combines a robust public health intervention in response to the  
10 dual epidemics of leprosy and TB in Kiribati, along with rigorous evaluation of the intervention.  
11 Population-wide leprosy active case-finding and MDA with rifamycin-based chemoprophylaxis  
12 in a population of approximately 60,000 represents a bold step towards acceleration of leprosy  
13 control. Combining this intervention with a similar population-wide TB screening, treatment  
14 and prevention programme is an innovative health systems approach that could improve  
15 efficiency and feasibility of large-scale interventions for both diseases. If successful, this would  
16 present an important model that may be implemented in other settings.  
17  
18  
19  
20  
21  
22  
23  
24  
25  
26  
27

28 In Kiribati (and elsewhere<sup>12,30</sup>), MDA chemoprophylaxis in the 1990s led to reductions in  
29 leprosy case detection but ultimately failed to produce a lasting decline in incidence in some  
30 settings. The long latency period of the disease and the absence of surrogate measures of  
31 leprosy transmission make robust short-to-medium-term outcome measures of the population-  
32 level effect of interventions particularly limited. These are challenges intrinsic to population-  
33 level leprosy research. This study is designed to address these challenges by rigorous  
34 evaluation of scaled-up interventions in combination with durable partnership for evaluation of  
35 longer-term incidence and transmission outcomes. This 'real-life' operational research design  
36 to evaluate the main intervention is accompanied by a commitment to long-term surveillance  
37 by the MHMS together with the PLF until leprosy is eliminated in Kiribati. In the shorter and  
38 medium term, improvements in the accuracy of modelling of the intervention impact (using  
39 data from the COMBINE study) will provide useful insights and interim measures of the effect  
40 of COMBINE interventions upon leprosy incidence. This will be valuable to inform programs  
41 facing similar challenges to Kiribati.  
42  
43  
44  
45  
46  
47  
48  
49  
50  
51  
52  
53  
54  
55  
56  
57  
58  
59  
60

1  
2  
3 Kiribati is in a unique position, given its geographic isolation, low migration rate and limited  
4  
5 population size, to identify and test innovative elimination strategies as proof-of-principle for  
6  
7 leprosy control in other locations. We plan to grasp this opportunity and deliver much-needed  
8  
9 evidence to reinvigorate attempts to eliminate this age-old scourge of humankind.  
10  
11  
12  
13  
14  
15  
16  
17  
18  
19  
20  
21  
22  
23  
24  
25  
26  
27  
28  
29  
30  
31  
32  
33  
34  
35  
36  
37  
38  
39  
40  
41  
42  
43  
44  
45  
46  
47  
48  
49  
50  
51  
52  
53  
54  
55  
56  
57  
58  
59  
60

For peer review only



**Correspondence to:**

Prof Stephen T Chambers

*Pacific Leprosy Foundation,*

*4 Anderson Street, Addington,*

*Private Bag 4730,*

*Christchurch 8024, New Zealand;*

*and University of Otago,*

*Christchurch, New Zealand.*

[Steve.chambers@otago.ac.nz](mailto:Steve.chambers@otago.ac.nz)

**Contributors**

All authors contributed to the conceptualisation and panning of this research. All authors made important intellectual contributions to the final protocol manuscript. SC, WB and JT wrote the study proposal. MC and JH contributed equally to this paper. The funding agency played no part in any aspect of the study, nor the decision to submit this manuscript for publication.

**Acknowledgements**

We thank the chair of the Leprosy Reference Group in Kiribati, Ms Nanoo Maribo, for her support of the COMBINE study and the Kiribati National Leprosy Program for their outstanding contributions to this work. We thank Ms Kantaake Corbett, Kiribati Health Information Unit, Ms Aritita Tekaieti, Kiribati National Statistics Office, and Mr Luis de la Rua, Pacific Community Statistics for Development Division, for their assistance with baseline data.

**Funding**

The COMBINE study is funded by the Leprosy Research Initiative with 50% co-funding from the Turing foundation. Additional funding to support the collaborating National Leprosy Program is provided by the Pacific Leprosy Foundation, New Zealand. This work is a partnership with the PEARL study which is funded by the Australian Medical Research Future Fund (APP1200755).

**Competing interests' statement**

1  
2  
3 Some project funding is provided by the Pacific Leprosy Foundation, which also supports consultancy  
4 work of co-authors AC and NI.  
5  
6  
7  
8  
9  
10  
11  
12  
13  
14  
15  
16  
17  
18  
19  
20  
21  
22  
23  
24  
25  
26  
27  
28  
29  
30  
31  
32  
33  
34  
35  
36  
37  
38  
39  
40  
41  
42  
43  
44  
45  
46  
47  
48  
49  
50  
51  
52  
53  
54  
55  
56  
57  
58  
59  
60

For peer review only

### Figure 1. Overview of COMBINE study intervention

Overview of COMBINE study activities, comparing interventions delivered in South Tarawa (pink, intervention group) and in the rest of Kiribati (green, no intervention group). Activities are further divided according to those available at baseline across the country and continued during the study period, and those activities that will be delivered during the study period (vertical arrows at right). Geographical context is illustrated at top (not to scale). 3HP – three months of weekly isoniazid and rifapentine; 3RH – three months of daily isoniazid and rifampicin; ACF – active case finding; DST – drug susceptibility testing; MDA – mass drug administration; MDT – multi-drug treatment; NLP – national leprosy program; PCR – polymerase chain reaction; PEP – post-exposure prophylaxis; SDR – single-dose rifampicin; TB – tuberculosis; TPT – TB preventive treatment.

## REFERENCES

1. Resolution to eliminate leprosy as a public health problem by the year 2000 resolution  
WHA449. World Health Assembly: Geneva: 44th World Health Assembly, 1991.
2. WHO. World Health Organization leprosy elimination project: status report 2002: World  
Health Organization, 2003.
3. WHO. World Health Organization Global leprosy (Hansen disease) update, 2020: impact  
of COVID-19 on global leprosy control. *WklyEpidemiol Rec* 2021;96(36):421-44.
4. Urgesa K, Bobosha K, Seyoum B, et al. Evidence for hidden leprosy in a high leprosy-  
endemic setting, Eastern Ethiopia: The application of active case-finding and contact  
screening. *PLoS neglected tropical diseases* 2021;15(9):e0009640.
5. Bernardes F, Paula NAd, Leite MN, et al. Evidence of hidden leprosy in a supposedly low  
endemic area of Brazil. *Memórias do Instituto Oswaldo Cruz* 2017;112:822-28.
6. Smith WC, van Brakel W, Gillis T, et al. The missing millions: a threat to the elimination of  
leprosy. *PLoS neglected tropical diseases* 2015;9(4):e0003658.
7. de Oliveira GL, Oliveira JF, Pescarini JM, et al. Estimating underreporting of leprosy in  
Brazil using a Bayesian approach. *PLoS neglected tropical diseases*  
2021;15(8):e0009700.
8. Frade MAC, de Paula NA, Gomes CM, et al. Unexpectedly high leprosy seroprevalence  
detected using a random surveillance strategy in midwestern Brazil: A comparison of  
ELISA and a rapid diagnostic test. *PLoS neglected tropical diseases*  
2017;11(2):e0005375.
9. Mangeard-Lourme J, Singh A, Singh RK, et al. Enhanced active case-finding, identifying  
leprosy cases missed by recent detection campaigns in Munger District, Bihar, India.  
*Leprosy Review* 2017;88(4):452-62.
10. Salgado CG, Barreto JG, da Silva MB, et al. Are leprosy case numbers reliable? *The  
Lancet Infectious Diseases* 2018;18(2):135-37.
11. WHO. World Health Organization Towards zero leprosy. Global leprosy (Hansen's  
Disease) strategy 2021–2030. 2021

- 1  
2  
3 12. Tiwari A, Dandel S, Djupuri R, et al. Population-wide administration of single dose  
4 rifampicin for leprosy prevention in isolated communities: a three year follow-up  
5 feasibility study in Indonesia. *BMC Infect Dis* 2018;18(1):324. doi: 10.1186/s12879-  
6 018-3233-3 [published Online First: 2018/07/13]  
7  
8  
9
- 10  
11 13. Bakker MI, Hatta M, Kwenang A, et al. Prevention of leprosy using rifampicin as  
12 chemoprophylaxis. *The American journal of tropical medicine and hygiene*  
13 2005;72(4):443-48.  
14  
15
- 16  
17 14. WHO. World Health Organization consolidated guidelines on tuberculosis Module 2:  
18 Screening – Systematic screening for tuberculosis diseases. *Global Tuberculosis*  
19 *Programme 2021*  
20  
21  
22
- 23  
24 15. WHO. Rapid communication on systematic screening for tuberculosis. 2020  
25
- 26  
27 16. Marks GB, Nguyen NV, Nguyen PTB, et al. Community-wide Screening for Tuberculosis  
28 in a High-Prevalence Setting. *N Engl J Med* 2019;381(14):1347-57. doi:  
29 10.1056/NEJMoa1902129 [published Online First: 2019/10/03]  
30  
31
- 32  
33 17. Coleman M, Hill J, Timeon E, et al. Population-wide active case finding and prevention  
34 for tuberculosis and leprosy elimination in Kiribati: the PEARL study protocol. *BMJ*  
35 *Open* 2022;12(4):e055295. doi: 10.1136/bmjopen-2021-055295  
36  
37
- 38  
39 18. Gilkison C, Chambers S, Blok DJ, et al. Predicting the impact of household contact and  
40 mass chemoprophylaxis on future new leprosy cases in South Tarawa, Kiribati: A  
41 modelling study. *PLoS Negl Trop Dis* 2019;13(9):e0007646. doi:  
42 10.1371/journal.pntd.0007646 [published Online First: 2019/09/21]  
43  
44  
45
- 46  
47 19. Chambers ST, Ioteba N, Timeon E, et al. Surveillance of Leprosy in Kiribati, 1935–2017.  
48 *Emerging Infectious Diseases* 2020;26(5):833.  
49
- 50  
51 20. WHO. Leprosy/Hansen disease: Contact tracing and post-exposure prophylaxis. 2020  
52
- 53  
54 21. van Brakel WH, da Silva Pereira ZB, Barbosa JC, et al. Global Partnership for Zero  
55 Leprosy Research Agenda Working Group Subgroup on Stigma, 2019.  
56  
57  
58  
59  
60

- 1  
2  
3 22. Coppola M, van den Eeden SJ, Robbins N, et al. Vaccines for leprosy and tuberculosis:  
4 opportunities for shared research, development, and application. *Frontiers in*  
5 *immunology* 2018;9:308.  
6  
7  
8  
9 23. Lahiri R, Adams LB. Cultivation and viability determination of *Mycobacterium leprae*.  
10 *International Textbook of Leprosy* 2016  
11  
12  
13 24. Davis GL, Ray NA, Lahiri R, et al. Molecular assays for determining *Mycobacterium*  
14 *leprae* viability in tissues of experimentally infected mice. *PLoS neglected tropical*  
15 *diseases* 2013;7(8):e2404.  
16  
17  
18  
19 25. Williams DL, Torrero M, Wheeler PR, et al. Biological implications of *Mycobacterium*  
20 *leprae* gene expression during infection. *Microbial Physiology* 2004;8(1):58-72.  
21  
22  
23 26. Richardus JH, Tiwari A, Barth-Jaeggi T, et al. Leprosy post-exposure prophylaxis with  
24 single-dose rifampicin (LPEP): an international feasibility programme. *Lancet Glob*  
25 *Health* 2021;9(1):e81-e90. doi: 10.1016/s2214-109x(20)30396-x [published Online  
26 First: 2020/11/02]  
27  
28  
29  
30  
31  
32 27. Schoenmakers A, Mieras L, Budiawan T, et al. The State of Affairs in Post-Exposure  
33 Leprosy Prevention: A Descriptive Meta-Analysis on Immuno- and Chemo-  
34 Prophylaxis. *Res Rep Trop Med* 2020;11:97-117. doi: 10.2147/rrtm.S190300  
35 [published Online First: 2020/10/30]  
36  
37  
38  
39  
40 28. Feenstra SG, Pahan D, Moet FJ, et al. Patient-related factors predicting the  
41 effectiveness of rifampicin chemoprophylaxis in contacts: 6 year follow up of the  
42 COLEP cohort in Bangladesh. *Lepr Rev* 2012;83(3):292-304. [published Online First:  
43 2013/01/30]  
44  
45  
46  
47  
48 29. Cambau E, Saunderson P, Matsuoka M, et al. Antimicrobial resistance in leprosy: results  
49 of the first prospective open survey conducted by a WHO surveillance network for  
50 the period 2009–15. *Clinical Microbiology and Infection* 2018;24(12):1305-10.  
51  
52  
53  
54 30. Nguyen LN, Cartel JL, Grosset JH. Chemoprophylaxis of leprosy in the southern  
55 Marquesas with a single 25 mg/kg dose of rifampicin. Results after 10 years. *Lepr*  
56  
57  
58  
59  
60

Rev 2000;71 Suppl:S33-5; discussion S35-6. doi: 10.5935/0305-7518.20000064

[published Online First: 2001/02/24]

For peer review only

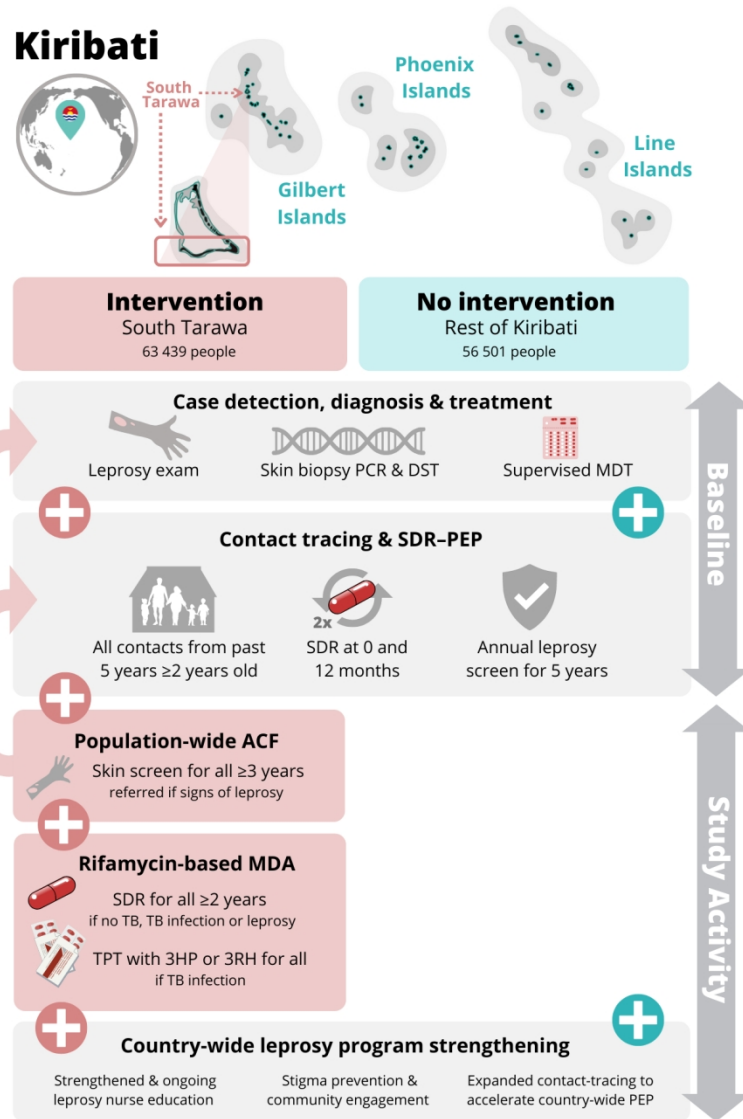

Figure 1. Overview of COMBINE study intervention. Overview of COMBINE study activities, comparing interventions delivered in South Tarawa (pink, intervention group) and in the rest of Kiribati (green, no intervention group). Activities are further divided according to those available at baseline across the country and continued during the study period, and those activities that will be delivered during the study period (vertical arrows at right). Geographical context is illustrated at top (not to scale). 3HP – three months of weekly isoniazid and rifapentine; 3RH – three months of daily isoniazid and rifampicin; ACF – active case finding; DST – drug susceptibility testing; MDA – mass drug administration; MDT – multi-drug treatment; NLP – national leprosy program; PCR – polymerase chain reaction; PEP – post-exposure prophylaxis; SDR – single-dose rifampicin; TB – tuberculosis; TPT – TB preventive treatment.

536x758mm (67 x 67 DPI)



## Supplementary Materials

*Mass drug administration for leprosy control in Kiribati: The COMBINE protocol*

### SUPPLEMENT 1. Leprosy screening Standard Operating Procedure

#### Population leprosy screening – general steps

1. Ask about leprosy (this may be done at a history taking station)
2. Conduct a physical check for leprosy
3. Record findings in CRF
  - a. Take a photo of any examination findings
4. Refer for further evaluation if there are any findings (this may be within the screening clinic, or to the leprosy clinic, depending on staffing)

#### Population leprosy screening – details

Ask (this may be done at a history taking station)

- Have you had or do you have leprosy? Have you ever been treated for leprosy?
- Are you a household contact\* of someone who has had leprosy?
- Are you worried you might have leprosy? If so, why?
- Do you have any skin lesions or other abnormalities that you think could be leprosy?

Exposure

- Remove footwear and any outer layers of clothing

Areas of body to inspect

- Face including eyelashes, eyebrows, nose and mouth
- Ears
- Neck
- Arms and hands

- Legs and feet
- Lift the shirt and lower the waistband for back and upper buttocks

#### Looking for

- Skin lesions (pale, red, thick, raised, shiny)
  - Check if itchy, if so, don't refer to NLP (consider alternative referral if concerning)
- Skin nodules
- Altered shape of nose or ears
- Loss of eyelashes or eyebrows
- Altered shape of hand or foot
  - Check if present from birth, if so, don't refer
- Ulcers on hand or foot

#### Who to refer?

- People with physical examination findings consistent with leprosy
- People who are worried they might have leprosy (any reason)

#### How to record

- Fill the CRF
- Take a photo (good lighting, ruler or TST syringe for scale)
- Refer for further evaluation (this may be within the screening clinic, or to the leprosy clinic, depending on staffing)
- Give referral letter if needed

\* Household contact is defined according to WHO. *“Household contacts: contacts living in the same dwelling or sharing the same kitchen as the index case. These include family members but also domestic staff or aids or co-workers or others sharing the same accommodation. A family member living elsewhere should not be considered as a contact.”*

1  
2  
3 **SUPPLEMENT 2.**  
4

5 **Table S1.** Single dose rifampicin (SDR) chemoprophylaxis dosing.  
6

| Age/body weight                          | Rifampicin<br>dose | single |
|------------------------------------------|--------------------|--------|
| 15 years and above                       | 600 mg             |        |
| 10-14 years                              | 450 mg             |        |
| Children 6-9 years (weight $\geq$ 20 kg) | 300 mg             |        |
| Children 6-9 years (weight $<$ 20 kg)    | 150 mg             |        |
| Children $<$ 5 years                     | 10-15 mg/kg        |        |

22  
23  
24 **Table S2.** Tuberculosis preventive treatment dosing.  
25

26 **S2A.** 12 doses of weekly isoniazid (H) and rifapentine (P) for adults and children  $\geq$ 25 kg  
27

| Weight band                    | HP (300mg/300mg) tablets |
|--------------------------------|--------------------------|
| 25-30kg<br>(or $<$ 15ys)       | 2                        |
| $\geq$ 30kg<br>and $\geq$ 15ys | 3                        |

38  
39  
40 **S2B.** 3 months of daily dosing of child-friendly water-dispersible rifampicin (R) and isoniazid  
41 (H) tablets for children  $<$ 25kg  
42

| Weight band | RH (75mg/50mg) tablets |
|-------------|------------------------|
| 4-7kg       | 1                      |
| 8-11kg      | 2                      |
| 12-15kg     | 3                      |
| 16-25kg     | 4                      |

### SUPPLEMENT 3. Participant Information

## PARTICIPANT INFORMATION

### Finding and preventing TB and leprosy cases in Tarawa

#### Dear participant,

We would like to invite you (and your child if relevant) to be treated for latent or sleeping TB. This document provides information about the study, but we will also explain the study to you in person. You will have the opportunity to ask questions if there is anything that you do not understand or if you want more information. You may refuse participation and this will not be held against you or affect any future access to healthcare.

#### What is this study about?

TB is a disease caused by germs that are coughed into the air by someone who is ill with TB. Most people who are infected with the TB germ do not become ill and do not even know that they are infected, this is referred to as latent or 'sleeping' TB. **Sometimes sleeping TB can wake up and make you ill, which may spread the germ to others.** This research aims to treat all people with TB, those who are ill and those with sleeping TB, so that we can try to eliminate TB from Tarawa. At the same time we are also trying to eliminate leprosy from Tarawa.

This Participant Information Form tells you about the study so that you can know what it involves. Please read this sheet carefully and ask questions about anything that you don't understand or want to know more about.

#### Who is conducting the study?

The study is carried out by researchers at the University of Sydney, Australia, in close collaboration with the Kiribati National TB and Leprosy Programme (NTP). The study is funded by the Australian Medical Research Future Fund and fully supported by the Kiribati Ministry of Health.

### **What will happen?**

This study involves screening for TB (both 'sleeping TB' and illness caused by TB) and leprosy. People who are ill with TB or leprosy will be referred to the TB and Leprosy Programme for appropriate treatment. People with 'sleeping TB' will be offered TB preventive treatment (TPT) and those without any illness or TB infection will be offered leprosy preventive prophylaxis.

To check if someone is able to be given medication for sleeping TB, a study nurse will ask some personal questions. This may include questions about previous and current illnesses, medications used, drinking of alcohol or kava, and questions about pregnancy if you are a woman. Every person older than 20 years will be given a rapid test to see if they have hepatitis B infection, which is important for us to know before considering treatment for 'sleeping TB'. This test involves a finger prick to get a small drop of blood. People with risk factors will need to have a small amount of blood drawn to make sure their liver function stays healthy during the time that they are treated for sleeping TB.

### **How much of my time will the study take?**

We will try to waste as little of your time as possible. To complete the TB and leprosy screening will require you (and your whole household) to be seen on two separate days. This is to complete all the necessary documentation and tests. It is expected that this will take about 2-3 hours of your time on each of these days. Those diagnosed with sleeping TB will need to take tablets once a week for 12 weeks. Tablets will be given out at the mobile health clinic on a monthly basis and can be collected between 9am and 4pm on weekdays.

### **Who can take part in the study?**

Every person older than 3 years of age living in Tarawa and Betio islet is invited to take part.

### **Do I have to be in the study? Can I withdraw from the study once I've started?**

1  
2  
3 Taking part in this study is strongly recommended by the Kiribati Ministry of Health and Medical  
4 Services (MHMS) to get rid of TB and leprosy across Tarawa. However, participation is  
5 completely voluntary and you do not have to take part. Your decision will not affect your current  
6 or future relationship with the researchers, the Kiribati National TB and leprosy Program or the  
7 Ministry of Health.  
8  
9  
10  
11  
12

13 If you decide to take part in the study and then change your mind later, you are free to withdraw  
14 at any time. You can do this by visiting the study clinic and speaking with a study nurse who  
15 will give you exit information and advice on how to stay healthy from TB in the future.  
16  
17  
18

19 If you decide to withdraw from the study, we will not collect any further information from you.  
20 Information that we have already collected will be kept in our study records and may be  
21 included in the study results.  
22  
23  
24  
25

### 26 **Are there any costs or risks associated with being in the study?**

27 There are no costs associated with study participation. Mobile study clinics will be  
28 conveniently situated to be easily accessible and all study tests or treatment will be funded by  
29 the study.  
30  
31  
32  
33

34 If treatment for 'sleeping TB' is provided it is normal to feel a bit tired and to have bright orange  
35 urine while you are taking the tablets. Rarely people may develop some of the symptoms  
36 below, in which case it is important to inform us immediately. Rare symptoms to look out for  
37 include:  
38  
39  
40  
41  
42

- 43 • ongoing nausea, vomiting or loss of appetite
  - 44 • new rash or itchy skin
  - 45 • yellowing skin or eyes
  - 46 • tingling or numbness in fingers or toes
  - 47 • any other symptoms of concern to you
- 48  
49  
50  
51  
52  
53  
54  
55  
56  
57  
58  
59  
60

1  
2  
3 Study nurses and doctors are available Monday to Friday, 9am to 4pm to see anyone who is  
4 feeling sick and thinks this may be due to their treatment. You may also call the 24-hour  
5 treatment hotline using the number on the back of your treatment card (TPT passport).  
6  
7  
8

9 **Are there any benefits associated with being in the study?**

10  
11 Yes, there are major benefits to yourself and the wider community of Tarawa, including Betio  
12 islet  
13

- 14 • You (and your child) will get treatment for TB or leprosy if required
- 15 • You (and your child) will get treatment for sleeping TB (TPT) or to keep  
16 leprosy away
- 17 • You will help to eliminate TB and leprosy from Tarawa
- 18 • Study results will help other Pacific Island nations to eliminate TB and  
19 leprosy in the future
- 20
- 21
- 22
- 23
- 24
- 25
- 26
- 27
- 28
- 29

30  
31 **What if I have a complaint or any concerns about the study?**

32  
33 This research has been reviewed by an independent group of people called a Human  
34 Research Ethics Committee (HREC) at the University of Sydney and the Kiribati Ministry of  
35 Health and Medical Services.  
36  
37

38  
39 If you are concerned about the way this study is being conducted please inform the study  
40 team; we want to learn and hear how we can improve things. If you wish to make a complaint  
41 to someone independent then please contact any of the people listed below.  
42  
43

44  
45 Terotia Tabwaka Kelese, Human Resource Officer, Republic of Kiribati

46  
47 **Email:** [ttabwaka@gmail.com](mailto:ttabwaka@gmail.com)

48  
49 or

50  
51 The Manager, Ethics Administration, University of Sydney:

52  
53 **Telephone:** +61 2 8627 8176

54  
55 **Email:** [human.ethics@sydney.edu.au](mailto:human.ethics@sydney.edu.au)

56  
57 **Fax:** +61 2 8627 8177 (Facsimile)  
58  
59  
60

## Ethical Approval

This research plan (protocol) was approved by the ethics committee of the faculty of medicine and health at the University of Sydney. This helps to ensure that we do everything possible to keep you safe and to respect your rights and privacy at all times.

## We thank you for your time and cooperation.

The PEARL Research Team with the support of the Kiribati National TB and Leprosy Control Programmes. Further information can be found at [www.thepearlstudy.org](http://www.thepearlstudy.org)

## On behalf of the Kiribati Health Secretary

.....



## SUPPLEMENT 4. Informed Consent Form

**INFORMED CONSENT PROCESS FORM**

**Date of informed consent**   Today D-M-Y

**Does the participant have capacity to consent?**

Yes

No - young person <18 years of age

No - disability

No - other reason reset

**Name of Consenting Guardian**

**Relationship of consenting guardian**

parent

spouse

grandparent

aunt/uncle

sibling

other relative

non-relative guardian reset

**Does the participant assent to participate in the study?**

Yes

No reset

**Does the participant/primary caregiver agree to participate in study?**

Yes

No reset

**Can participant/caregiver read Kiribati?**

Yes

No reset

**Can participant/caregiver read English?**

Yes

No reset

**Participant information given and all participant questions answered?**

Yes

No reset

**Participant is aware that this is a public health intervention endorsed and supported by the Kiribati Ministry of Health and Medical Services?**

Yes

No reset

**Participant is aware that screen may involve providing sputum or blood samples?**

1. Yes/ Yes

0. No/ No reset

**Date & Time Participant/caregiver signed documentation of consent**    Now D-M-Y H:M

**Sign**

 [Add signature](#)

**Other comments**

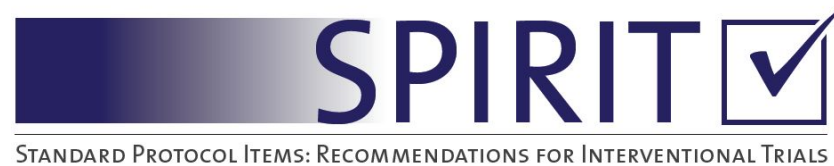

## Mass drug administration for leprosy control in Kiribati: The COMBINE protocol

SPIRIT 2013 Checklist: Recommended items to address in a clinical trial protocol and related documents\*

| Section/item                      | Item No | Description                                                                                                                                                                                                                                                                              | Addressed on page number |
|-----------------------------------|---------|------------------------------------------------------------------------------------------------------------------------------------------------------------------------------------------------------------------------------------------------------------------------------------------|--------------------------|
| <b>Administrative information</b> |         |                                                                                                                                                                                                                                                                                          |                          |
| Title                             | 1       | Descriptive title identifying the study design, population, interventions, and, if applicable, trial acronym                                                                                                                                                                             | 1                        |
| Trial registration                | 2a      | Trial identifier and registry name. If not yet registered, name of intended registry                                                                                                                                                                                                     | NA not a trial           |
|                                   | 2b      | All items from the World Health Organization Trial Registration Data Set                                                                                                                                                                                                                 | NA not a trial           |
| Protocol version                  | 3       | Date and version identifier                                                                                                                                                                                                                                                              | 3                        |
| Funding                           | 4       | Sources and types of financial, material, and other support                                                                                                                                                                                                                              | 22                       |
| Roles and responsibilities        | 5a      | Names, affiliations, and roles of protocol contributors                                                                                                                                                                                                                                  | 1-2; 22                  |
|                                   | 5b      | Name and contact information for the trial sponsor                                                                                                                                                                                                                                       | 22                       |
|                                   | 5c      | Role of study sponsor and funders, if any, in study design; collection, management, analysis, and interpretation of data; writing of the report; and the decision to submit the report for publication, including whether they will have ultimate authority over any of these activities | 22                       |
|                                   | 5d      | Composition, roles, and responsibilities of the coordinating centre, steering committee, endpoint adjudication committee, data management team, and other individuals or groups overseeing the trial, if applicable (see Item 21a for data monitoring committee)                         | 18-19                    |

|    |                                                           |     |                                                                                                               |                  |
|----|-----------------------------------------------------------|-----|---------------------------------------------------------------------------------------------------------------|------------------|
| 1  | <b>Introduction</b>                                       |     |                                                                                                               |                  |
| 2  |                                                           |     |                                                                                                               |                  |
| 3  | Background and                                            | 6a  | Description of research question and justification for undertaking the trial, including summary of relevant   | 7-9              |
| 4  | rationale                                                 |     | studies (published and unpublished) examining benefits and harms for each intervention                        |                  |
| 5  |                                                           |     |                                                                                                               |                  |
| 6  |                                                           | 6b  | Explanation for choice of comparators                                                                         | 10               |
| 7  |                                                           |     |                                                                                                               |                  |
| 8  | Objectives                                                | 7   | Specific objectives or hypotheses                                                                             | 10               |
| 9  |                                                           |     |                                                                                                               |                  |
| 10 | Trial design                                              | 8   | Description of trial design including type of trial (eg, parallel group, crossover, factorial, single group), |                  |
| 11 |                                                           |     | allocation ratio, and framework (eg, superiority, equivalence, noninferiority, exploratory)                   | 10               |
| 12 |                                                           |     |                                                                                                               |                  |
| 13 |                                                           |     |                                                                                                               |                  |
| 14 | <b>Methods: Participants, interventions, and outcomes</b> |     |                                                                                                               |                  |
| 15 |                                                           |     |                                                                                                               |                  |
| 16 | Study setting                                             | 9   | Description of study settings (eg, community clinic, academic hospital) and list of countries where data will | 10-12            |
| 17 |                                                           |     | be collected. Reference to where list of study sites can be obtained                                          |                  |
| 18 |                                                           |     |                                                                                                               |                  |
| 19 | Eligibility criteria                                      | 10  | Inclusion and exclusion criteria for participants. If applicable, eligibility criteria for study centres and  | 13-14; table 2   |
| 20 |                                                           |     | individuals who will perform the interventions (eg, surgeons, psychotherapists)                               |                  |
| 21 |                                                           |     |                                                                                                               |                  |
| 22 | Interventions                                             | 11a | Interventions for each group with sufficient detail to allow replication, including how and when they will be | 12-14; figure 1; |
| 23 |                                                           |     | administered                                                                                                  | table 2          |
| 24 |                                                           |     |                                                                                                               |                  |
| 25 |                                                           | 11b | Criteria for discontinuing or modifying allocated interventions for a given trial participant (eg, drug dose  | 13; 18-19;       |
| 26 |                                                           |     | change in response to harms, participant request, or improving/worsening disease)                             | Supplement 2     |
| 27 |                                                           |     |                                                                                                               |                  |
| 28 |                                                           | 11c | Strategies to improve adherence to intervention protocols, and any procedures for monitoring adherence        | 12-15; 18-19     |
| 29 |                                                           |     | (eg, drug tablet return, laboratory tests)                                                                    |                  |
| 30 |                                                           |     |                                                                                                               |                  |
| 31 |                                                           | 11d | Relevant concomitant care and interventions that are permitted or prohibited during the trial                 | 12-15; 18-19; S2 |
| 32 |                                                           |     |                                                                                                               |                  |
| 33 | Outcomes                                                  | 12  | Primary, secondary, and other outcomes, including the specific measurement variable (eg, systolic blood       |                  |
| 34 |                                                           |     | pressure), analysis metric (eg, change from baseline, final value, time to event), method of aggregation (eg, | 16-18            |
| 35 |                                                           |     | median, proportion), and time point for each outcome. Explanation of the clinical relevance of chosen         |                  |
| 36 |                                                           |     | efficacy and harm outcomes is strongly recommended                                                            |                  |
| 37 |                                                           |     |                                                                                                               |                  |
| 38 | Participant timeline                                      | 13  | Time schedule of enrolment, interventions (including any run-ins and washouts), assessments, and visits for   | 10               |
| 39 |                                                           |     | participants. A schematic diagram is highly recommended (see Figure)                                          |                  |
| 40 |                                                           |     |                                                                                                               |                  |
| 41 |                                                           |     |                                                                                                               |                  |
| 42 |                                                           |     |                                                                                                               |                  |
| 43 |                                                           |     |                                                                                                               |                  |
| 44 |                                                           |     |                                                                                                               |                  |
| 45 |                                                           |     |                                                                                                               |                  |
| 46 |                                                           |     |                                                                                                               |                  |

|    |                                                                     |     |                                                                                                                                                                                                                                                                                                                                                                                                              |                        |
|----|---------------------------------------------------------------------|-----|--------------------------------------------------------------------------------------------------------------------------------------------------------------------------------------------------------------------------------------------------------------------------------------------------------------------------------------------------------------------------------------------------------------|------------------------|
| 1  | Sample size                                                         | 14  | Estimated number of participants needed to achieve study objectives and how it was determined, including clinical and statistical assumptions supporting any sample size calculations                                                                                                                                                                                                                        | 17                     |
| 2  |                                                                     |     |                                                                                                                                                                                                                                                                                                                                                                                                              |                        |
| 3  |                                                                     |     |                                                                                                                                                                                                                                                                                                                                                                                                              |                        |
| 4  | Recruitment                                                         | 15  | Strategies for achieving adequate participant enrolment to reach target sample size                                                                                                                                                                                                                                                                                                                          | 15                     |
| 5  |                                                                     |     |                                                                                                                                                                                                                                                                                                                                                                                                              |                        |
| 6  |                                                                     |     |                                                                                                                                                                                                                                                                                                                                                                                                              |                        |
| 7  | <b>Methods: Assignment of interventions (for controlled trials)</b> |     |                                                                                                                                                                                                                                                                                                                                                                                                              |                        |
| 8  | Allocation:                                                         |     |                                                                                                                                                                                                                                                                                                                                                                                                              |                        |
| 9  |                                                                     |     |                                                                                                                                                                                                                                                                                                                                                                                                              |                        |
| 10 | Sequence generation                                                 | 16a | Method of generating the allocation sequence (eg, computer-generated random numbers), and list of any factors for stratification. To reduce predictability of a random sequence, details of any planned restriction (eg, blocking) should be provided in a separate document that is unavailable to those who enrol participants or assign interventions                                                     | NA non-random          |
| 11 |                                                                     |     |                                                                                                                                                                                                                                                                                                                                                                                                              |                        |
| 12 |                                                                     |     |                                                                                                                                                                                                                                                                                                                                                                                                              |                        |
| 13 |                                                                     |     |                                                                                                                                                                                                                                                                                                                                                                                                              |                        |
| 14 |                                                                     |     |                                                                                                                                                                                                                                                                                                                                                                                                              |                        |
| 15 |                                                                     |     |                                                                                                                                                                                                                                                                                                                                                                                                              |                        |
| 16 | Allocation concealment mechanism                                    | 16b | Mechanism of implementing the allocation sequence (eg, central telephone; sequentially numbered, opaque, sealed envelopes), describing any steps to conceal the sequence until interventions are assigned                                                                                                                                                                                                    | NA population-wide     |
| 17 |                                                                     |     |                                                                                                                                                                                                                                                                                                                                                                                                              |                        |
| 18 |                                                                     |     |                                                                                                                                                                                                                                                                                                                                                                                                              |                        |
| 19 |                                                                     |     |                                                                                                                                                                                                                                                                                                                                                                                                              |                        |
| 20 | Implementation                                                      | 16c | Who will generate the allocation sequence, who will enrol participants, and who will assign participants to interventions                                                                                                                                                                                                                                                                                    | NA population-wide     |
| 21 |                                                                     |     |                                                                                                                                                                                                                                                                                                                                                                                                              |                        |
| 22 |                                                                     |     |                                                                                                                                                                                                                                                                                                                                                                                                              |                        |
| 23 |                                                                     |     |                                                                                                                                                                                                                                                                                                                                                                                                              |                        |
| 24 | Blinding (masking)                                                  | 17a | Who will be blinded after assignment to interventions (eg, trial participants, care providers, outcome assessors, data analysts), and how                                                                                                                                                                                                                                                                    | NA open-label          |
| 25 |                                                                     |     |                                                                                                                                                                                                                                                                                                                                                                                                              |                        |
| 26 |                                                                     |     |                                                                                                                                                                                                                                                                                                                                                                                                              |                        |
| 27 |                                                                     | 17b | If blinded, circumstances under which unblinding is permissible, and procedure for revealing a participant's allocated intervention during the trial                                                                                                                                                                                                                                                         | NA open-label          |
| 28 |                                                                     |     |                                                                                                                                                                                                                                                                                                                                                                                                              |                        |
| 29 |                                                                     |     |                                                                                                                                                                                                                                                                                                                                                                                                              |                        |
| 30 |                                                                     |     |                                                                                                                                                                                                                                                                                                                                                                                                              |                        |
| 31 | <b>Methods: Data collection, management, and analysis</b>           |     |                                                                                                                                                                                                                                                                                                                                                                                                              |                        |
| 32 |                                                                     |     |                                                                                                                                                                                                                                                                                                                                                                                                              |                        |
| 33 | Data collection methods                                             | 18a | Plans for assessment and collection of outcome, baseline, and other trial data, including any related processes to promote data quality (eg, duplicate measurements, training of assessors) and a description of study instruments (eg, questionnaires, laboratory tests) along with their reliability and validity, if known. Reference to where data collection forms can be found, if not in the protocol | 16-18;<br>Supplement 1 |
| 34 |                                                                     |     |                                                                                                                                                                                                                                                                                                                                                                                                              |                        |
| 35 |                                                                     |     |                                                                                                                                                                                                                                                                                                                                                                                                              |                        |
| 36 |                                                                     |     |                                                                                                                                                                                                                                                                                                                                                                                                              |                        |
| 37 |                                                                     |     |                                                                                                                                                                                                                                                                                                                                                                                                              |                        |
| 38 |                                                                     |     |                                                                                                                                                                                                                                                                                                                                                                                                              |                        |
| 39 |                                                                     | 18b | Plans to promote participant retention and complete follow-up, including list of any outcome data to be collected for participants who discontinue or deviate from intervention protocols                                                                                                                                                                                                                    | 18-19                  |
| 40 |                                                                     |     |                                                                                                                                                                                                                                                                                                                                                                                                              |                        |
| 41 |                                                                     |     |                                                                                                                                                                                                                                                                                                                                                                                                              |                        |
| 42 |                                                                     |     |                                                                                                                                                                                                                                                                                                                                                                                                              |                        |
| 43 |                                                                     |     |                                                                                                                                                                                                                                                                                                                                                                                                              |                        |
| 44 |                                                                     |     |                                                                                                                                                                                                                                                                                                                                                                                                              |                        |
| 45 |                                                                     |     |                                                                                                                                                                                                                                                                                                                                                                                                              |                        |
| 46 |                                                                     |     |                                                                                                                                                                                                                                                                                                                                                                                                              |                        |

|    |                                 |     |                                                                                                                                                                                                                                                                                                                                       |       |
|----|---------------------------------|-----|---------------------------------------------------------------------------------------------------------------------------------------------------------------------------------------------------------------------------------------------------------------------------------------------------------------------------------------|-------|
| 1  | Data management                 | 19  | Plans for data entry, coding, security, and storage, including any related processes to promote data quality (eg, double data entry; range checks for data values). Reference to where details of data management procedures can be found, if not in the protocol                                                                     | 18    |
| 2  |                                 |     |                                                                                                                                                                                                                                                                                                                                       |       |
| 3  |                                 |     |                                                                                                                                                                                                                                                                                                                                       |       |
| 4  |                                 |     |                                                                                                                                                                                                                                                                                                                                       |       |
| 5  | Statistical methods             | 20a | Statistical methods for analysing primary and secondary outcomes. Reference to where other details of the statistical analysis plan can be found, if not in the protocol                                                                                                                                                              | 16-18 |
| 6  |                                 |     |                                                                                                                                                                                                                                                                                                                                       |       |
| 7  |                                 |     |                                                                                                                                                                                                                                                                                                                                       |       |
| 8  |                                 | 20b | Methods for any additional analyses (eg, subgroup and adjusted analyses)                                                                                                                                                                                                                                                              | 16-18 |
| 9  |                                 |     |                                                                                                                                                                                                                                                                                                                                       |       |
| 10 |                                 | 20c | Definition of analysis population relating to protocol non-adherence (eg, as randomised analysis), and any statistical methods to handle missing data (eg, multiple imputation)                                                                                                                                                       | 16-18 |
| 11 |                                 |     |                                                                                                                                                                                                                                                                                                                                       |       |
| 12 |                                 |     |                                                                                                                                                                                                                                                                                                                                       |       |
| 13 |                                 |     |                                                                                                                                                                                                                                                                                                                                       |       |
| 14 | <b>Methods: Monitoring</b>      |     |                                                                                                                                                                                                                                                                                                                                       |       |
| 15 |                                 |     |                                                                                                                                                                                                                                                                                                                                       |       |
| 16 | Data monitoring                 | 21a | Composition of data monitoring committee (DMC); summary of its role and reporting structure; statement of whether it is independent from the sponsor and competing interests; and reference to where further details about its charter can be found, if not in the protocol. Alternatively, an explanation of why a DMC is not needed | 18-19 |
| 17 |                                 |     |                                                                                                                                                                                                                                                                                                                                       |       |
| 18 |                                 |     |                                                                                                                                                                                                                                                                                                                                       |       |
| 19 |                                 |     |                                                                                                                                                                                                                                                                                                                                       |       |
| 20 |                                 |     |                                                                                                                                                                                                                                                                                                                                       |       |
| 21 |                                 |     |                                                                                                                                                                                                                                                                                                                                       |       |
| 22 |                                 | 21b | Description of any interim analyses and stopping guidelines, including who will have access to these interim results and make the final decision to terminate the trial                                                                                                                                                               | 18-19 |
| 23 |                                 |     |                                                                                                                                                                                                                                                                                                                                       |       |
| 24 |                                 |     |                                                                                                                                                                                                                                                                                                                                       |       |
| 25 | Harms                           | 22  | Plans for collecting, assessing, reporting, and managing solicited and spontaneously reported adverse events and other unintended effects of trial interventions or trial conduct                                                                                                                                                     | 18-19 |
| 26 |                                 |     |                                                                                                                                                                                                                                                                                                                                       |       |
| 27 |                                 |     |                                                                                                                                                                                                                                                                                                                                       |       |
| 28 | Auditing                        | 23  | Frequency and procedures for auditing trial conduct, if any, and whether the process will be independent from investigators and the sponsor                                                                                                                                                                                           | 19    |
| 29 |                                 |     |                                                                                                                                                                                                                                                                                                                                       |       |
| 30 |                                 |     |                                                                                                                                                                                                                                                                                                                                       |       |
| 31 |                                 |     |                                                                                                                                                                                                                                                                                                                                       |       |
| 32 | <b>Ethics and dissemination</b> |     |                                                                                                                                                                                                                                                                                                                                       |       |
| 33 |                                 |     |                                                                                                                                                                                                                                                                                                                                       |       |
| 34 | Research ethics approval        | 24  | Plans for seeking research ethics committee/institutional review board (REC/IRB) approval                                                                                                                                                                                                                                             | 4-5   |
| 35 |                                 |     |                                                                                                                                                                                                                                                                                                                                       |       |
| 36 |                                 |     |                                                                                                                                                                                                                                                                                                                                       |       |
| 37 | Protocol amendments             | 25  | Plans for communicating important protocol modifications (eg, changes to eligibility criteria, outcomes, analyses) to relevant parties (eg, investigators, REC/IRBs, trial participants, trial registries, journals, regulators)                                                                                                      | 18-19 |
| 38 |                                 |     |                                                                                                                                                                                                                                                                                                                                       |       |
| 39 |                                 |     |                                                                                                                                                                                                                                                                                                                                       |       |
| 40 |                                 |     |                                                                                                                                                                                                                                                                                                                                       |       |
| 41 |                                 |     |                                                                                                                                                                                                                                                                                                                                       |       |
| 42 |                                 |     |                                                                                                                                                                                                                                                                                                                                       |       |
| 43 |                                 |     |                                                                                                                                                                                                                                                                                                                                       |       |
| 44 |                                 |     |                                                                                                                                                                                                                                                                                                                                       |       |
| 45 |                                 |     |                                                                                                                                                                                                                                                                                                                                       |       |
| 46 |                                 |     |                                                                                                                                                                                                                                                                                                                                       |       |

|    |                               |     |                                                                                                                                                                                                                                                                                     |                |
|----|-------------------------------|-----|-------------------------------------------------------------------------------------------------------------------------------------------------------------------------------------------------------------------------------------------------------------------------------------|----------------|
| 1  | Consent or assent             | 26a | Who will obtain informed consent or assent from potential trial participants or authorised surrogates, and how (see Item 32)                                                                                                                                                        | 18-19; Table 2 |
| 2  |                               |     |                                                                                                                                                                                                                                                                                     |                |
| 3  |                               |     |                                                                                                                                                                                                                                                                                     |                |
| 4  |                               | 26b | Additional consent provisions for collection and use of participant data and biological specimens in ancillary studies, if applicable                                                                                                                                               | 18             |
| 5  |                               |     |                                                                                                                                                                                                                                                                                     |                |
| 6  |                               |     |                                                                                                                                                                                                                                                                                     |                |
| 7  | Confidentiality               | 27  | How personal information about potential and enrolled participants will be collected, shared, and maintained in order to protect confidentiality before, during, and after the trial                                                                                                | 18-19          |
| 8  |                               |     |                                                                                                                                                                                                                                                                                     |                |
| 9  |                               |     |                                                                                                                                                                                                                                                                                     |                |
| 10 | Declaration of interests      | 28  | Financial and other competing interests for principal investigators for the overall trial and each study site                                                                                                                                                                       | 22-23          |
| 11 |                               |     |                                                                                                                                                                                                                                                                                     |                |
| 12 |                               |     |                                                                                                                                                                                                                                                                                     |                |
| 13 | Access to data                | 29  | Statement of who will have access to the final trial dataset, and disclosure of contractual agreements that limit such access for investigators                                                                                                                                     | 18-19          |
| 14 |                               |     |                                                                                                                                                                                                                                                                                     |                |
| 15 |                               |     |                                                                                                                                                                                                                                                                                     |                |
| 16 | Ancillary and post-trial care | 30  | Provisions, if any, for ancillary and post-trial care, and for compensation to those who suffer harm from trial participation                                                                                                                                                       | NA             |
| 17 |                               |     |                                                                                                                                                                                                                                                                                     |                |
| 18 |                               |     |                                                                                                                                                                                                                                                                                     |                |
| 19 |                               |     |                                                                                                                                                                                                                                                                                     |                |
| 20 | Dissemination policy          | 31a | Plans for investigators and sponsor to communicate trial results to participants, healthcare professionals, the public, and other relevant groups (eg, via publication, reporting in results databases, or other data sharing arrangements), including any publication restrictions | 4-5            |
| 21 |                               |     |                                                                                                                                                                                                                                                                                     |                |
| 22 |                               |     |                                                                                                                                                                                                                                                                                     |                |
| 23 |                               |     |                                                                                                                                                                                                                                                                                     |                |
| 24 |                               | 31b | Authorship eligibility guidelines and any intended use of professional writers                                                                                                                                                                                                      | 22-23          |
| 25 |                               |     |                                                                                                                                                                                                                                                                                     |                |
| 26 |                               | 31c | Plans, if any, for granting public access to the full protocol, participant-level dataset, and statistical code                                                                                                                                                                     | NA             |
| 27 |                               |     |                                                                                                                                                                                                                                                                                     |                |
| 28 |                               |     |                                                                                                                                                                                                                                                                                     |                |
| 29 | <b>Appendices</b>             |     |                                                                                                                                                                                                                                                                                     |                |
| 30 |                               |     |                                                                                                                                                                                                                                                                                     |                |
| 31 | Informed consent materials    | 32  | Model consent form and other related documentation given to participants and authorised surrogates                                                                                                                                                                                  | Supplement 3-4 |
| 32 |                               |     |                                                                                                                                                                                                                                                                                     |                |
| 33 |                               |     |                                                                                                                                                                                                                                                                                     |                |
| 34 | Biological specimens          | 33  | Plans for collection, laboratory evaluation, and storage of biological specimens for genetic or molecular analysis in the current trial and for future use in ancillary studies, if applicable                                                                                      | 18             |
| 35 |                               |     |                                                                                                                                                                                                                                                                                     |                |
| 36 |                               |     |                                                                                                                                                                                                                                                                                     |                |

\*It is strongly recommended that this checklist be read in conjunction with the SPIRIT 2013 Explanation & Elaboration for important clarification on the items. Amendments to the protocol should be tracked and dated. The SPIRIT checklist is copyrighted by the SPIRIT Group under the Creative Commons [“Attribution-NonCommercial-NoDerivs 3.0 Unported”](https://creativecommons.org/licenses/by-nc-nd/3.0/) license.

# BMJ Open

## The effectiveness of population-wide screening and mass drug administration for leprosy control in Kiribati: The COMBINE protocol

|                                 |                                                                                                                                                                                                                                                                                                                                                                                                                                                                                                                                                                                                                                                                                                                                                                                                                                                                                                                                                                                                                                                                                                                                                                                                                                                                                                                                                                                                                                                                                                                                                                                                                                                                                                                                                                                                       |
|---------------------------------|-------------------------------------------------------------------------------------------------------------------------------------------------------------------------------------------------------------------------------------------------------------------------------------------------------------------------------------------------------------------------------------------------------------------------------------------------------------------------------------------------------------------------------------------------------------------------------------------------------------------------------------------------------------------------------------------------------------------------------------------------------------------------------------------------------------------------------------------------------------------------------------------------------------------------------------------------------------------------------------------------------------------------------------------------------------------------------------------------------------------------------------------------------------------------------------------------------------------------------------------------------------------------------------------------------------------------------------------------------------------------------------------------------------------------------------------------------------------------------------------------------------------------------------------------------------------------------------------------------------------------------------------------------------------------------------------------------------------------------------------------------------------------------------------------------|
| Journal:                        | <i>BMJ Open</i>                                                                                                                                                                                                                                                                                                                                                                                                                                                                                                                                                                                                                                                                                                                                                                                                                                                                                                                                                                                                                                                                                                                                                                                                                                                                                                                                                                                                                                                                                                                                                                                                                                                                                                                                                                                       |
| Manuscript ID                   | bmjopen-2022-065369.R1                                                                                                                                                                                                                                                                                                                                                                                                                                                                                                                                                                                                                                                                                                                                                                                                                                                                                                                                                                                                                                                                                                                                                                                                                                                                                                                                                                                                                                                                                                                                                                                                                                                                                                                                                                                |
| Article Type:                   | Protocol                                                                                                                                                                                                                                                                                                                                                                                                                                                                                                                                                                                                                                                                                                                                                                                                                                                                                                                                                                                                                                                                                                                                                                                                                                                                                                                                                                                                                                                                                                                                                                                                                                                                                                                                                                                              |
| Date Submitted by the Author:   | 26-Feb-2023                                                                                                                                                                                                                                                                                                                                                                                                                                                                                                                                                                                                                                                                                                                                                                                                                                                                                                                                                                                                                                                                                                                                                                                                                                                                                                                                                                                                                                                                                                                                                                                                                                                                                                                                                                                           |
| Complete List of Authors:       | <p>Coleman, Mikaela; The University of Sydney, Faculty of Medicine and Health; The Centenary Institute at the University of Sydney, Tuberculosis Research Program</p> <p>Hill, Jeremy; The University of Sydney, Faculty of Medicine and Health; The Centenary Institute at the University of Sydney, Tuberculosis Research Program</p> <p>Timeon, Eretii; Government of the Republic of Kiribati Ministry of Health and Medical Services</p> <p>Rimon, Erej; Government of the Republic of Kiribati Ministry of Health and Medical Services</p> <p>Bauro, Temea; Government of the Republic of Kiribati Ministry of Health and Medical Services</p> <p>Ioteba, Nabura; Pasifika Futures Ltd; Pacific Leprosy Foundation</p> <p>Cunanan, Arturo; Pacific Leprosy Foundation; Culion Sanatorium and General Hospital</p> <p>Douglas, Nicholas M; Christchurch Hospital, Department of Infectious Diseases; University of Otago, Department of Medicine</p> <p>Islam, Tauhid; Division of Programmes for Disease Control</p> <p>Tomlinson, Jill; Pacific Leprosy Foundation</p> <p>Campbell, Patrick O; Christchurch Hospital, Department of Infectious Diseases</p> <p>Williman, Jonathan; Christchurch School of Medicine and Health Sciences, Public Health and General Practice</p> <p>Priest, Patricia; University of Otago</p> <p>Marais, B; University of Sydney, Faculty of Medicine and Health; The University of Sydney Institute for Infectious Diseases</p> <p>Britton, Warwick; The Centenary Institute at the University of Sydney, Tuberculosis Research Program; Royal Prince Alfred Hospital, Department of Clinical Immunology</p> <p>Chambers, Stephen; The Pacific Leprosy Foundation; University of Otago</p> <p>Christchurch, Department of Pathology and Biomedical Science,</p> |
| <b>Primary Subject Heading</b>: | Infectious diseases                                                                                                                                                                                                                                                                                                                                                                                                                                                                                                                                                                                                                                                                                                                                                                                                                                                                                                                                                                                                                                                                                                                                                                                                                                                                                                                                                                                                                                                                                                                                                                                                                                                                                                                                                                                   |
| Secondary Subject Heading:      | Public health, Epidemiology, Global health, Infectious diseases                                                                                                                                                                                                                                                                                                                                                                                                                                                                                                                                                                                                                                                                                                                                                                                                                                                                                                                                                                                                                                                                                                                                                                                                                                                                                                                                                                                                                                                                                                                                                                                                                                                                                                                                       |
| Keywords:                       | Tropical medicine < INFECTIOUS DISEASES, Public health < INFECTIOUS DISEASES, Tuberculosis < INFECTIOUS DISEASES, Epidemiology < INFECTIOUS DISEASES, EPIDEMIOLOGY                                                                                                                                                                                                                                                                                                                                                                                                                                                                                                                                                                                                                                                                                                                                                                                                                                                                                                                                                                                                                                                                                                                                                                                                                                                                                                                                                                                                                                                                                                                                                                                                                                    |

1  
2  
3  
4  
5  
6  
7  
8  
9  
10  
11  
12  
13  
14  
15  
16  
17  
18  
19  
20  
21  
22  
23  
24  
25  
26  
27  
28  
29  
30  
31  
32  
33  
34  
35  
36  
37  
38  
39  
40  
41  
42  
43  
44  
45  
46  
47  
48  
49  
50  
51  
52  
53  
54  
55  
56  
57  
58  
59  
60

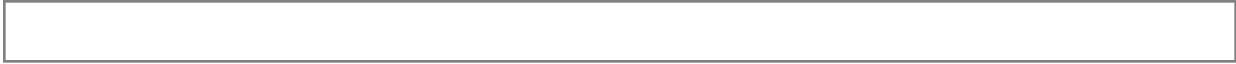

SCHOLARONE™  
Manuscripts



**TITLE**

The effectiveness of population-wide screening and mass drug administration for leprosy control in Kiribati: The COMBINE protocol

**AUTHORS**

Mikaela Coleman<sup>1,2\*</sup>, Jeremy Hill<sup>1,2\*</sup>, Eretii Timeon<sup>3</sup>, Erei Rimon<sup>3</sup>, Temea Bauro<sup>3</sup>, Nabura Ioteba<sup>4,5</sup>, Arturo Cunanan<sup>5,6</sup>, Nicholas M Douglas<sup>7,8,9</sup>, Tauhid Islam<sup>10</sup>, Jill Tomlinson<sup>5</sup>, Patrick O Campbell<sup>7</sup>, Jonathan Williman<sup>8</sup>, Patricia Priest<sup>11</sup>, Ben J Marais<sup>1,12</sup>, Warwick J Britton<sup>1,2,13</sup>, Stephen T Chambers<sup>5,14</sup>

**CORRESPONDING AUTHORS**

\*Dr Mikaela Coleman

Room 5.17, The Centenary Institute,

The University of Sydney

Camperdown, 2050

New South Wales, Australia

Phone: +61 411 419 047

Email: mikaela.coleman@sydney.edu.au

\*Dr Jeremy Hill

Room 5.17, The Centenary Institute,

The University of Sydney

Camperdown, 2050

New South Wales, Australia

Phone: +61 402 544 252

Email: jeremy.hill@sydney.edu.au

**AUTHOR AFFILIATIONS**

1 - Faculty of Medicine and Health, The University of Sydney, Sydney, New South Wales, Australia

2 - Tuberculosis Research Program at the Centenary Institute, The University of Sydney, Sydney, New South Wales, Australia

- 1  
2  
3 3 - Ministry of Health and Medical Services, Tarawa, Kiribati  
4  
5 4 – Pasifika Futures Ltd, Etu Pasifika Christchurch, New Zealand  
6  
7 5 - Pacific Leprosy Foundation, Christchurch, New Zealand  
8  
9 6 – Culion Sanatorium and General Hospital, Culion, Philippines  
10  
11 7 – Department of Infectious Diseases, Christchurch Hospital, Christchurch, New Zealand  
12  
13 8 – Department of Medicine, University of Otago, Christchurch, New Zealand  
14  
15 9 – Division of Global and Tropical Health, Menzies School of Health Research, Charles Darwin  
16 University, Darwin, Australia  
17  
18 10 - End TB and Leprosy Unit, Division of Programmes for Disease Control, WHO Regional Office for  
19 the Western Pacific, Manila, Philippines  
20  
21 11 – Department of Epidemiology and Public Health, The University of Otago, Dunedin  
22 Dunedin, New Zealand.  
23  
24 12 - The University of Sydney Institute for Infectious Diseases, Sydney, New South Wales, Australia.  
25  
26 13 - Department of Clinical Immunology, Royal Prince Alfred Hospital, Camperdown, New South  
27 Wales, Australia  
28  
29 14 – Department of Pathology and Biomedical Science, The University of Otago, Christchurch, New  
30 Zealand  
31  
32  
33  
34  
35  
36  
37  
38  
39  
40  
41  
42  
43  
44  
45  
46  
47  
48  
49  
50  
51  
52  
53  
54  
55  
56  
57  
58  
59  
60

**WORD COUNT:**Abstract: **300**Strengths and limitations: **124**Main text: **4355**Contact, Acknowledgements, Funding: **236**References: **30**Tables: **3**Figures: **1**Supplement: **5****KEYWORDS:**

1  
2 leprosy; Hansen's disease; mass drug administration; MDA; population; contacts;  
3  
4 prevention; prophylaxis; single-dose rifampicin; SDR; intervention; post-exposure  
5  
6 prophylaxis; PEP; active case finding; ACF; universal leprosy prophylaxis; mass  
7  
8 chemoprophylaxis; rifapentine; Pacific; Kiribati  
9  
10  
11  
12

13 **PROTOCOL VERSION:**

14  
15 2  
16  
17  
18  
19  
20  
21  
22  
23  
24  
25  
26  
27  
28  
29  
30  
31  
32  
33  
34  
35  
36  
37  
38  
39  
40  
41  
42  
43  
44  
45  
46  
47  
48  
49  
50  
51  
52  
53  
54  
55  
56  
57  
58  
59  
60

## ABSTRACT

Progress towards leprosy elimination is threatened by increasing incidence in 'hot-spot' areas where more effective control strategies are urgently required. In these areas, active case finding and leprosy prevention limited to known contacts is insufficient for control. Population-wide active case-finding together with universal prevention through mass drug administration (MDA) has been shown to be effective in 'hot-spot' areas, but is logistically challenging and expensive. Combining leprosy screening and MDA with other population-wide screening activities such as for tuberculosis may increase programme efficiency. There has been limited evaluation of the feasibility and effectiveness of combined screening and MDA interventions. The COMBINE study aims to bridge this knowledge gap.

### Methods and analysis

This implementation study will assess the feasibility and effectiveness of active leprosy case-finding and treatment, combined with MDA using either single-dose rifampicin or rifamycin-containing tuberculosis preventive or curative treatment, for reducing leprosy incidence in Kiribati. The leprosy programme will run over 2022–2025 in concert with population-wide tuberculosis screening-and-treatment in South Tarawa. The primary research question is to what extent the intervention reduces the annual leprosy new case detection rate (NCDR) compared to routine screening and post-exposure prophylaxis (PEP) among close contacts (baseline leprosy control activities). Comparisons will be made with 1) the pre-intervention NCDR in South Tarawa (before-after study) and 2) the NCDR in the rest of the country. Additionally, the post-intervention prevalence of leprosy obtained from a survey of a 'hot-spot' sub-population will be compared to prevalence documented during the intervention. The intervention will be implemented in collaboration with the Kiribati National Leprosy Program.

### Ethics and dissemination

Approval has been obtained from the Kiribati Ministry of Health and Medical Services (MHMS), the University of Otago (H22/111) and the University of Sydney (2021/127) Human Research

1  
2  
3 Ethics Committees. Findings will be shared with the MHMS, local communities and  
4  
5 internationally through publication.  
6  
7  
8  
9  
10  
11  
12  
13  
14  
15  
16  
17  
18  
19  
20  
21  
22  
23  
24  
25  
26  
27  
28  
29  
30  
31  
32  
33  
34  
35  
36  
37  
38  
39  
40  
41  
42  
43  
44  
45  
46  
47  
48  
49  
50  
51  
52  
53  
54  
55  
56  
57  
58  
59  
60

For peer review only

### Strengths and limitations of this study

- Designed for both rapid and sustained reduction in leprosy prevalence using a combination of active case-finding with treatment and mass drug administration for population-wide chemoprophylaxis
- Geographically isolated island with high rates of leprosy, relatively small population and limited population mobility, facilitating proof-of-principle testing with low risk of dilution of intervention effect
- Dovetailing of existing leprosy and tuberculosis elimination activities has the potential to maximise efficiency and impact, especially in settings with a high-incidence of both diseases
- The absence of randomisation limits attribution of effect to the intervention; partially compensated for by employing multiple comparator assessments
- Despite the geographic isolation, the long implementation period (3 years) may allow leprosy re-infection events to occur in the community through inter-island travel

## INTRODUCTION

Since the 1991 World Health Association resolution to eliminate leprosy,[1] tremendous progress has been made towards global leprosy elimination.[2] However, despite enhanced early detection and availability of effective treatment and prevention options, progress has reversed in some leprosy 'hot-spots' (regions of high leprosy endemicity).[3] National leprosy disease and disability rates have stagnated in most of the 23 leprosy global priority countries with an increase in grade-2 disability reported in 2020 for 7 of these countries, including Kiribati.<sup>3</sup> Global de-funding for leprosy control and health system prioritisation of diseases with more obvious and immediate clinical presentations than leprosy have exacerbated these challenges. Point prevalence surveys in leprosy endemic regions reveal many undetected cases, with major case detection and reporting gaps responsible for the 'missing millions'. [4–10] Although the relatively low incidence of childhood leprosy (6.8% of all newly detected cases) indicates that transmission has declined globally, this is not true in all areas with cases among children increasing in some countries.[3]

The ongoing leprosy disease burden in the Pacific Island nation of Kiribati is emblematic of the global situation in high burden countries. Kiribati has one of the highest leprosy incidence rates in the world and these rates are on the rise; the Ministry of Health and Medical Services (MHMS) reports a 17% increase in incidence from 2010 to 2020, with 15.9 new cases detected per 10,000 people in 2020.[3] Curative and preventive services are routinely provided by the National Leprosy Program (NLP) in line with World Health Organization (WHO) guidelines, in partnership with the Pacific Leprosy Foundation (PLF). The NLP screens contacts for leprosy and, if active leprosy is not identified, provides single-dose rifampicin for post-exposure prophylaxis (SDR-PEP) immediately and one year later. In addition, contacts are screened for signs and symptoms of leprosy annually for four more years after the initial screening. SDR-PEP was introduced in 2018 and has since been provided to 89% of all eligible leprosy contacts recorded since 2010, which amounts to screening and prophylaxis for ~9% of the total population of Kiribati (10,406 contacts). Despite these interventions, most new leprosy

1  
2 cases in Kiribati are detected passively rather than by contact tracing with many presenting  
3 with advanced disease; almost half of all cases have multibacillary disease. These cases have  
4 long infectious periods before diagnosis and are an important source of transmission in the  
5 community.  
6  
7  
8  
9

10  
11  
12  
13 To make an impact on the leprosy epidemic in Kiribati and to meet the ambitious Zero Leprosy  
14 target to halve global leprosy incidence by 2030,[11] bold new strategies are needed. Such  
15 strategies should be designed to break the chain of leprosy transmission and to reduce the  
16 risk of disease progression in highly endemic regions. One avenue for exploration is to expand  
17 the reach of active case-finding (ACF) and preventive interventions in high-risk populations.  
18  
19 In previous studies, regions with smaller populations, but similar disease burdens to Kiribati,  
20 have benefitted from population wide ACF and mass drug administration (MDA) with SDR to  
21 reduce the risk of progression to leprosy disease in the community, irrespective of contact  
22 status.[12-13] Population-wide programmes can be very challenging to implement on a large  
23 scale because of the logistical demands of reaching whole populations, difficulties achieving  
24 acceptability and buy-in, poor access to microbial confirmation in resourced-limited settings,  
25 a lack of clinical expertise for diagnoses, and challenges in mobilising resources to support  
26 population-wide programmes. The result is that leprosy MDA for large populations (>5,000  
27 people) is often considered unfeasible in the regions where it is most needed.  
28  
29  
30  
31  
32  
33  
34  
35  
36  
37  
38  
39  
40  
41  
42  
43  
44

45 Twenty-one of the 23 leprosy priority countries also have endemic tuberculosis (TB).[3] The  
46 relatively greater funding for TB and the global movement towards expanded ACF for TB,[14-  
47 16] the shared susceptibility of *Mycobacterium leprae* and *Mycobacterium tuberculosis* to  
48 rifamycins for preventive therapy, and the similar social determinants of transmission and  
49 disease all present opportunities for leprosy control programs to leverage TB programmes for  
50 mutual gain. Where the burden of both diseases is sufficiently high, this can take the form of  
51 combined population wide ACF and MDA chemoprophylaxis activities. In South Tarawa, the  
52 PEARL study (Pathway to the Elimination of Antibiotic Resistant and Latent tuberculosis (as  
53  
54  
55  
56  
57  
58  
59  
60



1  
2 well as leprosy) in the Pacific)[17] provides the mechanism by which a combined intervention  
3 may be delivered at a fraction of the cost of a separate programme. Modelling of a mass  
4 chemoprophylaxis strategy for leprosy suggests this is an effective strategy,[18] and  
5 combining mass screening and treatment for TB are expected to greatly increase efficiency  
6 and cost-effectiveness. South Tarawa was chosen for the PEARL study as it is the centre with  
7 the highest population density in Kiribati and has the highest estimated incidence of TB and  
8 leprosy.  
9  
10  
11  
12  
13  
14  
15  
16  
17  
18

19 The COMBINE study is designed to inform programmatic strategies towards leprosy  
20 elimination in the Pacific and elsewhere. We aim to assess the effectiveness, feasibility,  
21 efficiency and cost of a programme of leprosy screening and mass rifamycin-based  
22 chemoprophylaxis delivered in combination with a TB screening, treatment and prevention  
23 initiative in Kiribati.[17] We will provide evidence for practicable means of integrating leprosy  
24 control with other communicable disease programmes that can be used to effectively  
25 accelerate leprosy prevention and care in endemic regions. Many of the research questions  
26 addressed by the COMBINE study must be answered to achieve scalable and durable leprosy  
27 elimination in countries like Kiribati.  
28  
29  
30  
31  
32  
33  
34  
35  
36  
37  
38  
39  
40  
41  
42  
43  
44  
45  
46  
47  
48  
49  
50  
51  
52  
53  
54  
55  
56  
57  
58  
59  
60

## OBJECTIVES

The COMBINE study assesses the feasibility and effectiveness of leprosy screening and MDA chemoprophylaxis in a highly endemic population using a programmatic approach that:

- Investigates whether combined population-wide screening and treatment for leprosy and TB together with MDA chemoprophylaxis and ongoing SDR-PEP for contacts can achieve rapid and durable reductions in leprosy incidence;
- Evaluates the effectiveness of leprosy MDA chemoprophylaxis using a pragmatic combination of either SDR or rifamycin-based TB preventive treatment;
- Measures the cost of MDA delivery when integrated with infrastructure from an existing population-wide screening program (the PEARL study[17]);
- Documents operational strategies to feasibly integrate enhanced leprosy and TB control efforts, and to reduce leprosy associated stigma.

## METHODS AND ANALYSIS

### Study design

COMBINE is a pragmatic controlled non-randomised before-and-after implementation study designed to evaluate the impact of the intervention upon leprosy NCDR. The COMBINE study will leverage infrastructure created by the PEARL study to deliver population-wide leprosy ACF and chemoprophylaxis. We will deliver the intervention over 3 years commencing November 2022 and ending November 2025, aiming to reach the entire population of South Tarawa in that time. The timeline of planned activities for the COMBINE study is illustrated in Supplementary Figure 1.

### Setting

The Republic of Kiribati is a geographically isolated nation in the Pacific region comprising 32 atolls and one raised coral island spread over a land territory of 811 km<sup>2</sup> amid an ocean territory of 3.5 million km<sup>2</sup>. The intervention site is the capital atoll of South Tarawa (population

63,439) which is the densely-populated 'transmission hot-spot' and amplifier of leprosy disease throughout the country (see **Table 1** for baseline characteristics of the study population).[19] Kiribati has only one specialised leprosy clinic which is located in South Tarawa. Residents live in village communities on a chain of low-lying islets connected by a causeway. Visitors from 'outer islands' to the capital often stay for an extended period. Anecdotally, this pattern of travel in and out of South Tarawa is associated with clusters of TB and leprosy in outer island communities.

While diagnosis and contact-tracing practices have been improved and standardised since 2010, it is uncertain whether the upward trend in new case detection rate (NCDR) in Kiribati over the past decade is an accurate measure of worsening epidemic control or reflective of enhanced case detection. What is clear, is that child NCDR has exceeded 30% of all newly detected cases for the past 3-years (2019-2021), indicating that the background community-level leprosy transmission has outpaced the potential to control the disease burden with existing leprosy programme interventions.

**Table 1.** Baseline characteristics of the population and intervention group

|                                                     | <b>Intervention group</b><br><i>South Tarawa</i> | <b>No intervention group</b><br><i>Rest of Kiribati</i> | <b>Whole of Kiribati</b> |
|-----------------------------------------------------|--------------------------------------------------|---------------------------------------------------------|--------------------------|
| <b>Population, 2020 *</b>                           | 63,439                                           | 56,501                                                  | 119,940                  |
| - <b>Females (%)</b>                                | 32,981 (52.0%)                                   | 27,805 (49.2%)                                          | 60,786 (50.7%)           |
| - <b>Median age (years)</b>                         | 23.2                                             | 22.3                                                    | 22.9                     |
| - <b>Average household size (people)</b>            | 6.6                                              | 4.9                                                     | 5.0                      |
| - <b>Net migration rate (% of population)</b>       | 2%                                               | 0.7%                                                    | 1.4%                     |
| <b>Urbanisation</b>                                 | Majority urban;<br>some rural                    | Majority rural;<br>some urban                           | Mixed urban and<br>rural |
| <b>BCG coverage, 2021 (% of live births) **</b>     | 2434/2525 (96.4%)                                | 839/888 (94.5%)                                         | 3273/3413<br>(95.9%)     |
| <b>Leprosy new cases, 2020 (rate per 10,000) **</b> | 93 (14.44)                                       | 62 (11.15)                                              | 155 (12.92)              |
| - <b>Child cases (%)</b>                            | 18 (19.4%)                                       | 18 (29.0%)                                              | 36 (23.2%)               |

|                                       |            |            |              |
|---------------------------------------|------------|------------|--------------|
| - <b>MB cases (%)</b>                 | 50 (53.8%) | 20 (32.3%) | 70 (45.2%)   |
| <b>Eligible contacts 2010–2020 **</b> | 9527       | 2264       | 11,811       |
| - <b>received SDR (%)</b>             | 8381 (88%) | 2021 (89%) | 10,402 (89%) |

Selected baseline characteristics or populations in the intervention area (South Tarawa), no intervention area (rest of Kiribati) and for the whole of Kiribati. BCG – Bacille Calmette-Guerin; MB – multibacillary; SDR – single-dose rifampicin.

\* *National Statistics Office, 2020 census data*

\*\* *Ministry of Health and Medical Services, programme data*

### **Intervention group and recruitment**

The intervention group comprises residents of South Tarawa (and the small communities of Buota and Abatao adjacent to South Tarawa) aged 3-years and above, and aged less than 3-years if they have documented household contact (relevant definitions are provided in **Box 1**) with someone who has had TB in the past 1 year, or leprosy at any time since they were born. Study participants will be identified via household and village-level lists of residents from the 2020 census, and then invited to attend screening locations using door-to-door visits at households and community-based institutions (businesses, churches, et cetera). Basic demographic, social and geographic data will be collected at enrolment by the PEARL study screening teams.

#### **Box 1. Definitions**

**Case of leprosy** – clinical definition classified as multibacillary (MB) or paucibacillary (PB) according to WHO criteria that has been diagnosed by the doctor of the NLP.

**Household** - all those using the same kitchen, including members of extended families, the Maneaba (communal hospitality shelters), and dormitories in individual locations.

**Household contact** - any person who has been in contact with a new leprosy case for at least 20 hours per week for at least three months during the past five years.\*

*\*adapted from WHO definition for the Kiribati context*

## Interventions

An illustration of the combined TB and leprosy interventions is provided in **Figure 1**, comparing the intervention group and standard care in the comparison group. Interventions are described in detail below. In practice, these interventions will be delivered in the setting of a combined community-based screening, diagnosis, treatment and prevention service.

### *Case detection, diagnosis and treatment*

Screening for leprosy will be conducted by a physical examination and questionnaire (**Supplement 1**). People with presumptive leprosy will be referred to the National Leprosy Program (NLP) for expert diagnosis. Cases will be validated by a leprologist and skin biopsies from all patients with clinically diagnosed leprosy will be tested by PCR for *M. leprae* and drug resistance mutations, according to WHO guidelines.[14] Leprosy treatment will be provided by the NLP according to Kiribati national guidelines. Further details of the leprosy screening, diagnosis and treatment eligibility criteria are available in the PEARL study protocol.[17]

### *Contact Tracing and Post-Exposure Prophylaxis*

Contact tracing and SDR-PEP will be ongoing for all index cases identified during the intervention within the study site and throughout the rest of Kiribati, as is consistent with routine practice (**Box 1**). WHO recommends that leprosy contacts should be given SDR-PEP at  $\geq 2$  years of age.[20] This has been adopted by the Kiribati NLP since 2018 and will be supported by the COMBINE study to scale-up SDR-PEP delivery throughout the intervention period, as enhanced index case detection will increase contact tracing needs. Children who are younger than 2-years and are leprosy contacts will be followed up and offered SDR-PEP by the NLP when they reach 2 years of age.

### *Leprosy Mass Drug Administration Chemoprophylaxis*

Rifamycin-based MDA chemoprophylaxis is provided using a composite of treatments. After integrated leprosy and TB screening, participants will be commenced on treatment for TB, treatment for leprosy, or TPT using a rifamycin-based regimen, depending on the screening outcome. For participants who are not eligible for any of those treatments, we will then offer a single dose of rifampicin according to the inclusion/exclusion criteria in **Table 2**. Considered together as in **Table 3**, all participants will be offered a rifamycin-based treatment; effectively a rifamycin-based leprosy MDA chemoprophylaxis. Detailed dosing information is provided in **Supplement 2**. SDR for PEP and MDA will be provided without baseline blood tests, consistent with the standard of care in Kiribati.

**Table 2.** Inclusion and exclusion criteria for single dose rifampicin

| Inclusion criteria                                                                                                                                            | Exclusion criteria                                                          |
|---------------------------------------------------------------------------------------------------------------------------------------------------------------|-----------------------------------------------------------------------------|
| 1. Enrolled in the screening intervention                                                                                                                     | 1. History of serious liver or kidney disease.                              |
| 2. Not eligible for any other rifamycin-based treatment                                                                                                       | 2. Known pregnancy (SDR can be given after delivery).                       |
| 3. Aged $\geq 2$ years                                                                                                                                        | 3. Known allergy or severe adverse effects experienced with rifampicin use. |
| 4. Informed consent. For children (<18 years) consent will be obtained from the parent or guardian, and children ( $\geq 10$ years) will also provide assent. | 4. Refuses participation.                                                   |

Inclusion criteria are shown for single dose rifampicin. Other treatment regimens are determined by indications and contraindications relevant to those regimens. MDA – mass drug administration; SDR – single-dose rifampicin.

**Table 3.** Overview of combined treatment and chemoprophylaxis

| Screening outcome | Treatment offered     | Rifamycin component                |
|-------------------|-----------------------|------------------------------------|
| Leprosy           | Leprosy MDT           | Monthly rifampicin for 6-12 months |
| TB                | TB treatment          | Daily rifampicin for 6-12 months   |
| RR-TB             | DR-TB treatment + SDR | Single dose rifampicin             |

|                   |            |                                                     |
|-------------------|------------|-----------------------------------------------------|
| Eligible for TPT  | 3HP or 3RH | Weekly rifapentine or daily rifampicin for 3 months |
| Leprosy HHC       | SDR-PEP    | Rifampicin given at baseline and one year later     |
| None of the above | SDR-MDA    | Single dose of rifampicin                           |

Screening outcomes are exhaustive but not mutually exclusive. The rifamycin component of each treatment strategy includes sufficient exposure to offer prevention for leprosy, in effect a mass drug administration of leprosy chemoprophylaxis. 3HP – 3-months of weekly rifapentine and isoniazid; 3RH – 3-months of daily rifampicin and isoniazid; DR-TB – drug-resistant tuberculosis; HHC – household contact; MDA – mass drug administration; MDT – multi-drug treatment; NLP – national leprosy program; PCR – polymerase chain reaction; PEP – post-exposure prophylaxis; RR-TB – rifampicin-resistant tuberculosis; SDR – single-dose rifampicin; TB – tuberculosis; TPT – tuberculosis preventive treatment.

### *Community Engagement and Stigma Prevention*

The objective of community engagement and mass communications is to encourage participation in the screening programme and sensitise community members to appropriate, non-stigmatising messages related to leprosy and leprosy screening. This approach is supported by the best practice statement of the Global Partnership for Zero Leprosy.[11,21] The COMBINE study supports community engagement and stigma prevention through various activities developed in concert with the PLF (who have 10 years of experience in leprosy advocacy in Kiribati) and the MHMS. These activities include:

- bi-annual advocacy activity drives which may include leprosy awareness parades, plays, signage and mass communication.
- convening of a leprosy community support group for patients diagnosed with leprosy and their close contacts/families. COMBINE nurses will assist with mentoring the community group, training in coping strategies and supporting activities.

- annual training and development workshops including all staff of the national leprosy and TB programmes with anti-stigma training for health staff delivering the COMBINE screening intervention
- job-aids and resources to support health staff and people with leprosy, for example a flipbook to aid counselling sessions between health workers and people with leprosy

#### *Post-intervention prevalence survey*

A follow-up leprosy prevalence survey will be conducted in Betio islet (~18,500 people, located within the South Tarawa intervention group) 3-4 years after the intervention there has been completed.

#### **Outcome measures and planned analyses**

The primary research question of interest is the extent to which the intervention reduces leprosy annual NCDR compared with standard routine passive case-finding and post-exposure prophylaxis of close contacts. This will be assessed 1) by comparing the post-intervention NCDR in South Tarawa (in 2025) with the pre-intervention NCDR (in 2021) and 2) by comparing the change in NCDR in South Tarawa (the intervention site) with the change in NCDR observed in the outer Kiribati islands (non-intervention sites). A supplementary analysis will compare the prevalence rate of leprosy in Betio (~15,000 people) found in the initial population-wide screening intervention with the rate found from a survey in the same population performed 3-4 years later. All primary, supplementary and planned analyses will be performed using standard statistical methods, for example using Poisson regression for the NCDR outcomes and logistic regression to compare prevalence during and after the intervention.

Due to the long latency of leprosy, we expect that the full effect of the intervention will only become apparent after several years have elapsed. MHMS and PLF are committed to



1  
2 continuing leprosy surveillance in Kiribati, enabling ongoing assessments of long-term trends  
3  
4 in disease burden beyond 2025.  
5  
6  
7  
8

9 Other planned analyses will examine:

- 10 1. Diagnostic yield of leprosy screening using an optimised clinical examination and brief  
11 history in the setting of a community-based multi-disease screening intervention.  
12
- 13 2. Description of the spectrum of leprosy disease in South Tarawa.  
14
- 15 3. Description of leprosy clusters and transmission patterns using geospatial data and  
16 social contact mapping  
17
- 18 4. The prevalence ratio of genotypic *M. leprae* resistance to rifampicin, dapsones and  
19 quinolones before and after the MDA programme (using PCR-based assays of skin  
20 biopsies) [22-25]  
21
- 22 5. The costs of leprosy-only activities, TB-only activities and shared activities to inform the  
23 cost-efficiency of future combined leprosy elimination projects in the Pacific and  
24 elsewhere  
25
- 26 6. The relative risk of leprosy diagnosis in participants with and without prior exposure to  
27 rifamycins (provided as part of routine activities of the NLP and NTP), prior BCG  
28 vaccination and prior TB infection and/or disease in a high-incidence setting  
29
- 30 7. The feasibility of combined TB and leprosy elimination efforts in the intervention site  
31 assessed using a mixed methods approach: measurement of treatment coverage,  
32 description of health service requirements (health care worker mix and person-time),  
33 description of infrastructure requirements, and surveys and interviews conducted with  
34 healthcare workers, decision makers, community representatives and study  
35 participants.  
36
- 37 8. Mathematical modelling of the dynamics of leprosy incidence using 'real life' data from  
38 the COMBINE study with the aim of refining previous models<sup>18</sup> to improve accuracy of  
39 forecasting and decision support  
40  
41  
42  
43  
44  
45  
46  
47  
48  
49  
50  
51  
52  
53  
54  
55  
56  
57  
58  
59  
60

### Sample size

Assuming mass chemoprophylaxis coverage of 80% of the population and given a leprosy NCDR of 1600/1,000,000 for South Tarawa (the intervention group, population ~65,000) and 872 per 1,000,000 for the rest of the country (comparison group, population ~55,000), the study would provide greater than 99% power ( $\alpha \leq 0.05$ ) to detect a 50% reduction (before versus after difference) in NCDR in South Tarawa (the intervention group) and 82% power to detect a 50% reduction in South Tarawa compared with no change in the rest of the country. Predicted sample sizes were calculated using the mean number of cases observed between 2018 and 2020 and simulated number of cases observed in 2025, drawn from a Poisson distribution (10,000 replicates) according to the parameters above and assuming a population growth of 5,000 in each area.

### Economic analysis and costing

COMBINE proposes to estimate unit costs for screening per patient, working closely with the PEARL study to perform a cost analysis of TB-only activities, leprosy-only activities and shared activities. Accurate costing data will inform future leprosy elimination projects in the Pacific region and beyond, and will have additional benefits for subsequent planning, budgeting and modelling exercises. To enhance the application of our findings, we will seek to align costing data with existing interagency costing tools.

### Data collection and monitoring

All leprosy and TB screening, chemoprophylaxis and outcome data will be captured offline on encrypted tablet devices using Research Electronic Data Capture (REDCap) surveys. Data will be uploaded and stored on a high security REDCap database server managed by the University of Sydney. Leprosy case and contact management data are already archived in a comprehensive NLP database, with maintenance supported by the PLF before, during and after the study. We will contribute case and contact data from the COMBINE study to the

1  
2  
3 existing supported database through routine study procedures. Mass screening and MDA data  
4  
5 will be available to NLP as needed and handed over to the NLP after study completion.  
6  
7

### 8 9 **Post-study follow-up activities**

10  
11 Country-wide ACF and PEP for household contacts will continue beyond the COMBINE study  
12  
13 as a joint-program implemented by the NLP and the PLF. We consider that the early findings  
14  
15 of the present study will enable mobilisation of funds to deliver similar population-wide leprosy  
16  
17 control activities in other parts of the country, as part of a 'Zero Leprosy Roadmap'. Case and  
18  
19 contact management records are already maintained in a comprehensive database, and  
20  
21 relevant data from the COMBINE study will be added as part of study procedures. Together  
22  
23 with mass screening data, this will provide a rich source for future analysis of long term  
24  
25 outcomes in the study population.  
26  
27  
28  
29

### 30 31 **ETHICS AND DISSEMINATION**

32  
33 Ethical approval for the COMBINE study has been obtained from the University of Sydney  
34  
35 (project no. 2021/127), the University of Otago (H22/111) and the Kiribati Ministry of Health  
36  
37 and Medical Services. Government support for the study to occur in collaboration with the NLP  
38  
39 has been provided by Kiribati National Cabinet.  
40  
41

42  
43 Participant information and counselling is provided to all prospective participants and again  
44  
45 before treatment is offered (**Supplement 3**). Editable versions of study patient tools and a  
46  
47 counselling flipbook are available at [www.leprosy.org.nz](http://www.leprosy.org.nz) and [www.thepearlstudy.org](http://www.thepearlstudy.org).  
48  
49 Informed consent is gathered verbally before participant enrolment and a signed record of  
50  
51 consent is collected in the study REDCap database (**Supplement 4**). Verbal consent for  
52  
53 participants attending the NLP for confirmation of diagnosis and treatment management will  
54  
55 be obtained according to standard programme practice. Written informed consent for a skin  
56  
57 biopsy will be taken as is usual in the clinic. This includes consent to send the specimen  
58  
59 abroad for analysis.  
60

1  
2  
3  
4  
5 The safety of treatments for TB are discussed in the PEARL study protocol.[17] SDR is very  
6 safe, and has been used in Kiribati [18,19] and elsewhere[12, 26-28] with little or no recorded  
7 side-effects. A study hotline and walk-in clinic will be freely available for adverse event (AE)  
8 management throughout the study period. Information on the signs and symptoms of leprosy  
9 and instructions to access the permanent leprosy clinic are provided to all participants  
10 (including those who decline to participate). Serious AEs are reported in accordance with  
11 national and University of Sydney pharmacovigilance standards. Intervention monitoring and  
12 auditing procedures will be conducted annually by the MHMS in accordance with routine  
13 practice with study reports made annually to ethics and funding bodies.  
14  
15  
16  
17  
18  
19  
20  
21  
22  
23  
24  
25

26 All study data will be shared with the MHMS. Reports of study progress will be made to the  
27 Kiribati community by mass communication and on the Pacific Leprosy Foundation and the  
28 PEARL study websites. Study findings will be presented at international conferences and in  
29 peer reviewed publications.  
30  
31  
32  
33  
34  
35

### 36 *Patient Involvement Statement*

37  
38 This study was developed with the involvement of a reference group of I-Kiribati people  
39 affected by leprosy. This group will be involved in the COMBINE study in an ongoing basis. In  
40 particular, they will give advice concerning the practical implementation of the research,  
41 including the best ways of liaising with patients, their families and the community to ensure  
42 that communication is positive and does not contribute to stigma for people identified with  
43 leprosy and their contacts.  
44  
45  
46  
47  
48  
49  
50  
51  
52

## 53 **DISCUSSION**

54  
55 Innovative solutions are required to achieve progress towards leprosy elimination in Kiribati  
56 and in other areas of continuing high incidence. This is essential if we are to overcome the  
57 barriers to achieving global Zero Leprosy targets,[11] and eventually, true global leprosy  
58  
59  
60

1  
2  
3 elimination. As leprosy continues to require long and complex treatment programs, there is  
4 also urgency to find novel control strategies before antibiotic resistance emerges and  
5 accelerates in high transmission populations.[29]  
6  
7  
8  
9

10  
11 The proposed study design combines a robust public health intervention in response to the  
12 dual epidemics of leprosy and TB in Kiribati, along with rigorous evaluation of the intervention.  
13 Population-wide leprosy active case-finding and MDA with rifamycin-based chemoprophylaxis  
14 in a population of approximately 60,000 represents a bold step towards acceleration of leprosy  
15 control. Combining this intervention with a similar population-wide TB screening, treatment  
16 and prevention programme is an innovative health systems approach that could improve  
17 efficiency and feasibility of large-scale interventions for both diseases. If successful, this would  
18 present an important model that may be implemented in other settings.  
19  
20  
21  
22  
23  
24  
25  
26  
27  
28  
29

30 There are several limitations associated with this study protocol that may affect outcomes.  
31 First, the population wide screening and mass drug administration intervention in this study is  
32 in essence a change in health policy whereby the target population is expanded to include all  
33 residents of South Tarawa, rather than just specific contacts or groups of individuals. As with  
34 any health policy change or community-facing intervention, the impact of this new approach  
35 is dependent on the new policy reaching a large proportion of the target population and being  
36 delivered with high fidelity to the proposed design. We will take every effort to achieve high  
37 uptake and retention in care by conducting extensive community mobilisation and health  
38 communication activities. Although the outcomes of this study are defined at population level  
39 (NCDR measured before and after) and not dependent on individual level enrolment and  
40 withdrawal, we will also maintain detailed individual level records to enhance follow-up.  
41  
42 Second, the intervention is not randomised. This will limit our ability to make inferences about  
43 causation, especially if the impact on NCDR is small. We hope that by including the rest of the  
44 country as a non-randomised 'control' group we will have some basis for comparison. Finally,  
45 the proposed combined approach to screening and prevention means that the intervention is  
46  
47  
48  
49  
50  
51  
52  
53  
54  
55  
56  
57  
58  
59  
60

1  
2  
3 more time consuming to deliver and will take longer to reach the entire target population. We  
4  
5 anticipate some level of reinfection to occur in already-screened areas of South Tarawa, while  
6  
7 we continue to deliver the intervention across the island. Although reinfections may reduce  
8  
9 the impact on measured NCDR, we anticipate that this would still be valuable information since  
10  
11 we are taking a 'real world' public health approach that could serve as an example to other  
12  
13 settings.

14  
15  
16  
17 In Kiribati (and elsewhere [12, 30]), MDA chemoprophylaxis in the 1990s led to reductions in  
18  
19 leprosy case detection but ultimately failed to produce a lasting decline in incidence in some  
20  
21 settings. The long latency period of the disease and the absence of surrogate measures of  
22  
23 leprosy transmission make robust short-to-medium-term outcome measures of the population-  
24  
25 level effect of interventions particularly limited. These are challenges intrinsic to population-  
26  
27 level leprosy research. This study is designed to address these challenges by rigorous  
28  
29 evaluation of scaled-up interventions in combination with durable partnership for evaluation of  
30  
31 longer-term incidence and transmission outcomes. This 'real-life' operational research design  
32  
33 to evaluate the main intervention is accompanied by a commitment by the MHMS together  
34  
35 with the PLF to deliver leprosy control activities over the longer term, until leprosy is eliminated  
36  
37 in Kiribati ([www.leprosy.org.nz](http://www.leprosy.org.nz)); this includes surveillance, continuation of rigorous contact  
38  
39 identification and management, and expansion of population-wide screening and mass drug  
40  
41 administration to the rest of the country. In the shorter and medium term, improvements in the  
42  
43 accuracy of modelling of the intervention impact (using data from the COMBINE study) will  
44  
45 provide useful insights and interim measures of the effect of COMBINE interventions upon  
46  
47 leprosy incidence. This will be valuable to inform programs facing similar challenges to Kiribati.  
48  
49 The present study, along with short, medium and long term aims and commitments are  
50  
51 currently being integrated using a 'Leprosy elimination roadmap', adapting the methods and  
52  
53 experiences of the Global Partnership for Zero Leprosy. By embedding this study within long-  
54  
55 term strategic partnerships, with ongoing funding and a comprehensive strategy, we hope that  
56  
57  
58  
59  
60

1  
2  
3 the missteps of previous MDA interventions can be avoided and lasting impact can be  
4  
5 achieved along with research outputs that will guide future interventions.[19]  
6  
7

8  
9 Kiribati is in a unique position, given its geographic isolation, low migration rate and limited  
10  
11 population size, to identify and test innovative elimination strategies as proof-of-principle for  
12  
13 leprosy control in other locations. We plan to grasp this opportunity and deliver much-needed  
14  
15 evidence to reinvigorate attempts to eliminate this age-old scourge of humankind.  
16  
17

18  
19  
20  
21  
22  
23  
24  
25  
26  
27  
28  
29  
30  
31  
32  
33  
34  
35  
36  
37  
38  
39  
40  
41  
42  
43  
44  
45  
46  
47  
48  
49  
50  
51  
52  
53  
54  
55  
56  
57  
58  
59  
60

For peer review only

**Correspondence to:**

Prof Stephen T Chambers  
*Pacific Leprosy Foundation,*  
*4 Anderson Street, Addington,*  
*Private Bag 4730,*  
*Christchurch 8024, New Zealand;*  
*and University of Otago,*  
*Christchurch, New Zealand.*  
[Steve.chambers@otago.ac.nz](mailto:Steve.chambers@otago.ac.nz)

**Contributors**

All authors contributed to the conceptualisation and panning of this research. MC, JH, NMD, JT, JW, BMJ, WJB and STC wrote the study proposal. ET, ER, TB, NI, AC, NMD, TI, POC and PP made important intellectual contributions to the final protocol manuscript. MC and JH contributed equally to this paper. The funding agency played no part in any aspect of the study, nor the decision to submit this manuscript for publication.

**Acknowledgements**

We thank the chair of the Leprosy Reference Group in Kiribati, Ms Nanoo Maribo, for her support of the COMBINE study and the Kiribati National Leprosy Program for their outstanding contributions to this work. We thank Ms Kantaake Corbett, Kiribati Health Information Unit, Ms Aritita Tekaieti, Kiribati National Statistics Office, and Mr Luis de la Rua, Pacific Community Statistics for Development Division, for their assistance with baseline data.

**Funding**

The COMBINE study is funded by the Leprosy Research Initiative with 50% co-funding from the Turing foundation. Additional funding to support the collaborating National Leprosy Program is provided by the Pacific Leprosy Foundation, New Zealand. This work is a partnership with the PEARL study which is funded by the Australian Medical Research Future Fund (APP1200755).

**Competing interests' statement**



1  
2  
3 Some project funding is provided by the Pacific Leprosy Foundation, which also supports consultancy  
4 work of co-authors AC and NI.  
5  
6  
7  
8  
9  
10  
11  
12  
13  
14  
15  
16  
17  
18  
19  
20  
21  
22  
23  
24  
25  
26  
27  
28  
29  
30  
31  
32  
33  
34  
35  
36  
37  
38  
39  
40  
41  
42  
43  
44  
45  
46  
47  
48  
49  
50  
51  
52  
53  
54  
55  
56  
57  
58  
59  
60

For peer review only

### Figure 1. Overview of COMBINE study intervention

Overview of COMBINE study activities, comparing interventions delivered in South Tarawa (pink, intervention group) and in the rest of Kiribati (green, no intervention group). Activities are further divided according to those available at baseline across the country and continued during the study period, and those activities that will be delivered during the study period (vertical arrows at right). Geographical context is illustrated at top (not to scale). 3HP – three months of weekly isoniazid and rifapentine; 3RH – three months of daily isoniazid and rifampicin; ACF – active case finding; DST – drug susceptibility testing; MDA – mass drug administration; MDT – multi-drug treatment; NLP – national leprosy program; PCR – polymerase chain reaction; PEP – post-exposure prophylaxis; SDR – single-dose rifampicin; TB – tuberculosis; TPT – TB preventive treatment.

## REFERENCES

1. Resolution to eliminate leprosy as a public health problem by the year 2000 resolution  
WHA449. World Health Assembly: Geneva: 44th World Health Assembly, 1991.
2. WHO. World Health Organization leprosy elimination project: status report 2002: World  
Health Organization, 2003.
3. WHO. World Health Organization Global leprosy (Hansen disease) update, 2020: impact  
of COVID-19 on global leprosy control. *Weekly Epidemiology Record*  
2021;96(36):421-44.
4. Urgesa K, Bobosha K, Seyoum B, et al. Evidence for hidden leprosy in a high leprosy-  
endemic setting, Eastern Ethiopia: The application of active case-finding and contact  
screening. *PLoS neglected tropical diseases* 2021;15(9):e0009640.
5. Bernardes F, Paula NAd, Leite MN, et al. Evidence of hidden leprosy in a supposedly low  
endemic area of Brazil. *Memórias do Instituto Oswaldo Cruz* 2017;112:822-28.
6. Smith WC, van Brakel W, Gillis T, et al. The missing millions: a threat to the elimination of  
leprosy. *PLoS neglected tropical diseases* 2015;9(4):e0003658.
7. de Oliveira GL, Oliveira JF, Pescarini JM, et al. Estimating underreporting of leprosy in  
Brazil using a Bayesian approach. *PLoS Neglected Tropical Diseases*  
2021;15(8):e0009700.
8. Frade MAC, de Paula NA, Gomes CM, et al. Unexpectedly high leprosy seroprevalence  
detected using a random surveillance strategy in midwestern Brazil: A comparison of  
ELISA and a rapid diagnostic test. *PLoS Neglected Tropical Diseases*  
2017;11(2):e0005375.
9. Mangeard-Lourme J, Singh A, Singh RK, et al. Enhanced active case-finding, identifying  
leprosy cases missed by recent detection campaigns in Munger District, Bihar, India.  
*Leprosy Review* 2017;88(4):452-62.
10. Salgado CG, Barreto JG, da Silva MB, et al. Are leprosy case numbers reliable? *The  
Lancet Infectious Diseases* 2018;18(2):135-37.

- 1  
2  
3 11. WHO. World Health Organization Towards zero leprosy. Global leprosy (Hansen's  
4  
5 Disease) strategy 2021–2030. 2021
- 6  
7 12. Tiwari A, Dandel S, Djupuri R, et al. Population-wide administration of single dose  
8  
9 rifampicin for leprosy prevention in isolated communities: a three year follow-up  
10  
11 feasibility study in Indonesia. *BMC Infectious Diseases* 2018;18(1):324. doi:  
12  
13 10.1186/s12879-018-3233-3 [published Online First: 2018/07/13]
- 14  
15 13. Bakker MI, Hatta M, Kwenang A, et al. Prevention of leprosy using rifampicin as  
16  
17 chemoprophylaxis. *The American Journal of Tropical Medicine and Hygiene*  
18  
19 2005;72(4):443-48.
- 20  
21 14. WHO. World Health Organization consolidated guidelines on tuberculosis Module 2:  
22  
23 Screening – Systematic screening for tuberculosis diseases. *Global Tuberculosis*  
24  
25 *Programme* 2021
- 26  
27 15. WHO. Rapid communication on systematic screening for tuberculosis. 2020
- 28  
29 16. Marks GB, Nguyen NV, Nguyen PTB, et al. Community-wide Screening for Tuberculosis  
30  
31 in a High-Prevalence Setting. *New England Journal of Medicine* 2019;381(14):1347-  
32  
33 57. doi: 10.1056/NEJMoa1902129 [published Online First: 2019/10/03]
- 34  
35 17. Coleman M, Hill J, Timeon E, et al. Population-wide active case finding and prevention  
36  
37 for tuberculosis and leprosy elimination in Kiribati: the PEARL study protocol. *BMJ*  
38  
39 *Open* 2022;12(4):e055295. doi: 10.1136/bmjopen-2021-055295
- 40  
41 18. Gilkison C, Chambers S, Blok DJ, et al. Predicting the impact of household contact and  
42  
43 mass chemoprophylaxis on future new leprosy cases in South Tarawa, Kiribati: A  
44  
45 modelling study. *PLoS Neglected Tropical Diseases* 2019;13(9):e0007646. doi:  
46  
47 10.1371/journal.pntd.0007646 [published Online First: 2019/09/21]
- 48  
49 19. Chambers ST, Ioteba N, Timeon E, et al. Surveillance of Leprosy in Kiribati, 1935–2017.  
50  
51 *Emerging Infectious Diseases* 2020;26(5):833.
- 52  
53 20. WHO. Leprosy/Hansen disease: Contact tracing and post-exposure prophylaxis. 2020
- 54  
55 21. van Brakel WH, da Silva Pereira ZB, Barbosa JC, et al. Global Partnership for Zero  
56  
57 Leprosy Research Agenda Working Group Subgroup on Stigma, 2019.
- 58  
59  
60

- 1  
2  
3 22. Coppola M, van den Eeden SJ, Robbins N, et al. Vaccines for leprosy and tuberculosis:  
4 opportunities for shared research, development, and application. *Frontiers in*  
5 *Immunology* 2018;9:308.  
6  
7  
8  
9 23. Lahiri R, Adams LB. Cultivation and viability determination of *Mycobacterium leprae*.  
10 *International Textbook of Leprosy* 2016  
11  
12  
13 24. Davis GL, Ray NA, Lahiri R, et al. Molecular assays for determining *Mycobacterium*  
14 *leprae* viability in tissues of experimentally infected mice. *PLoS Neglected Tropical*  
15 *Diseases* 2013;7(8):e2404.  
16  
17  
18  
19 25. Williams DL, Torrero M, Wheeler PR, et al. Biological implications of *Mycobacterium*  
20 *leprae* gene expression during infection. *Microbial Physiology* 2004;8(1):58-72.  
21  
22  
23 26. Richardus JH, Tiwari A, Barth-Jaeggi T, et al. Leprosy post-exposure prophylaxis with  
24 single-dose rifampicin (LPEP): an international feasibility programme. *Lancet Global*  
25 *Health* 2021;9(1):e81-e90. doi: 10.1016/s2214-109x(20)30396-x [published Online  
26 First: 2020/11/02]  
27  
28  
29  
30  
31 27. Schoenmakers A, Mieras L, Budiawan T, et al. The State of Affairs in Post-Exposure  
32 Leprosy Prevention: A Descriptive Meta-Analysis on Immuno- and Chemo-  
33 Prophylaxis. *Research and Reports in Tropical Medicine* 2020;11:97-117. doi:  
34 10.2147/rrtm.S190300 [published Online First: 2020/10/30]  
35  
36  
37  
38  
39 40 28. Feenstra SG, Pahan D, Moet FJ, et al. Patient-related factors predicting the  
41 effectiveness of rifampicin chemoprophylaxis in contacts: 6 year follow up of the  
42 COLEP cohort in Bangladesh. *Leprosy Review* 2012;83(3):292-304. [published  
43 Online First: 2013/01/30]  
44  
45  
46  
47  
48 49 29. Cambau E, Saunderson P, Matsuoka M, et al. Antimicrobial resistance in leprosy: results  
50 of the first prospective open survey conducted by a WHO surveillance network for  
51 the period 2009–15. *Clinical Microbiology and Infection* 2018;24(12):1305-10.  
52  
53  
54  
55 56 30. Nguyen LN, Cartel JL, Grosset JH. Chemoprophylaxis of leprosy in the southern  
57 Marquesas with a single 25 mg/kg dose of rifampicin. Results after 10 years. *Leprosy*  
58  
59  
60

1  
2  
3  
4  
5  
6  
7  
8  
9  
10  
11  
12  
13  
14  
15  
16  
17  
18  
19  
20  
21  
22  
23  
24  
25  
26  
27  
28  
29  
30  
31  
32  
33  
34  
35  
36  
37  
38  
39  
40  
41  
42  
43  
44  
45  
46  
47  
48  
49  
50  
51  
52  
53  
54  
55  
56  
57  
58  
59  
60

*Review* 2000;71 Suppl:S33-5; discussion S35-6. doi: 10.5935/0305-7518.20000064

[published Online First: 2001/02/24]

For peer review only



Figure 1. Overview of COMBINE study intervention. Overview of COMBINE study activities, comparing interventions delivered in South Tarawa (pink, intervention group) and in the rest of Kiribati (green, no intervention group). Activities are further divided according to those available at baseline across the country and continued during the study period, and those activities that will be delivered during the study period (vertical arrows at right). Geographical context is illustrated at top (not to scale). 3HP – three months of weekly isoniazid and rifapentine; 3RH – three months of daily isoniazid and rifampicin; ACF – active case finding; DST – drug susceptibility testing; MDA – mass drug administration; MDT – multi-drug treatment; NLP – national leprosy program; PCR – polymerase chain reaction; PEP – post-exposure prophylaxis; SDR – single-dose rifampicin; TB – tuberculosis; TPT – TB preventive treatment.

536x758mm (67 x 67 DPI)

## Supplementary Materials

*The effectiveness of population-wide screening and mass drug administration for leprosy control in Kiribati: The COMBINE protocol*

**SUPPLEMENTARY FIGURE 1:**

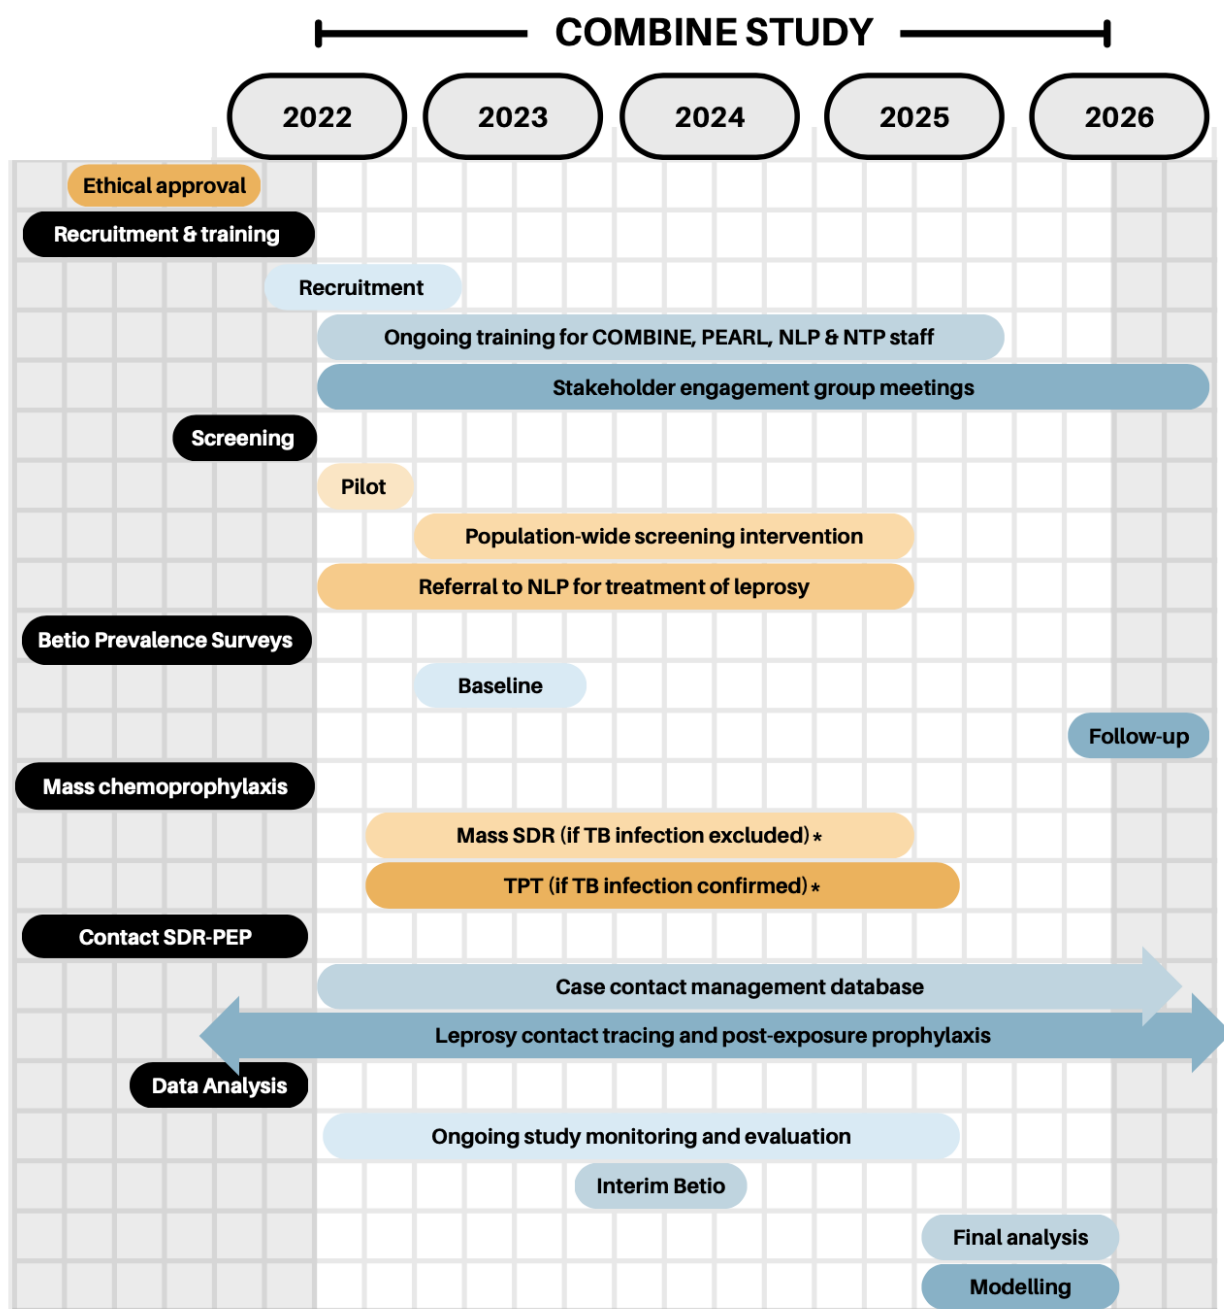



### Supplementary Figure 1. Timeline of COMBINE study activities

Formal COMBINE activities commenced in July 2022 and should conclude in June 2026, with data analysis and dissemination of outcomes included in this period. Left-facing arrow indicates activity which began prior to the COMBINE study. Right-facing arrows indicate activities which will continue beyond the end of the COMBINE study through NLP and PLF activities, provided adequate funding is procured. NLP – National leprosy program; NTP – National tuberculosis program; PEP – post-exposure prophylaxis; SDR – single-dose rifampicin; TPT – tuberculosis preventive treatment. *\*TB and leprosy disease also excluded*

## SUPPLEMENT 1. Leprosy screening Standard Operating Procedure

### Population leprosy screening – general steps

1. Ask about leprosy (this may be done at a history taking station)
2. Conduct a physical check for leprosy
3. Record findings in CRF
  - a. Take a photo of any examination findings
4. Refer for further evaluation if there are any findings (this may be within the screening clinic, or to the leprosy clinic, depending on staffing)

### Population leprosy screening – details

#### Ask (this may be done at a history taking station)

- Have you had or do you have leprosy? Have you ever been treated for leprosy?
- Are you a household contact\* of someone who has had leprosy?
- Are you worried you might have leprosy? If so, why?
- Do you have any skin lesions or other abnormalities that you think could be leprosy?

#### Exposure

- Remove footwear and any outer layers of clothing

#### Areas of body to inspect

- Face including eyelashes, eyebrows, nose and mouth
- Ears
- Neck
- Arms and hands
- Legs and feet
- Lift the shirt and lower the waistband for back and upper buttocks

#### Looking for

- Skin lesions (pale, red, thick, raised, shiny)
  - Check if itchy, if so, don't refer to NLP (consider alternative referral if concerning)
- Skin nodules
- Altered shape of nose or ears
- Loss of eyelashes or eyebrows
- Altered shape of hand or foot
  - Check if present from birth, if so, don't refer
- Ulcers on hand or foot

#### Who to refer?

- People with physical examination findings consistent with leprosy
- People who are worried they might have leprosy (any reason)

#### How to record

- Fill the CRF
- Take a photo (good lighting, ruler or TST syringe for scale)
- Refer for further evaluation (this may be within the screening clinic, or to the leprosy clinic, depending on staffing)
- Give referral letter if needed

\* Household contact is defined according to WHO. *"Household contacts: contacts living in the same dwelling or sharing the same kitchen as the index case. These include family members but also domestic staff or aids or co-workers or others sharing the same accommodation. A family member living elsewhere should not be considered as a contact."*

## SUPPLEMENT 2.

**Table S1.** Single dose rifampicin (SDR) chemoprophylaxis dosing.

| Age/body weight                          | Rifampicin<br>dose | single |
|------------------------------------------|--------------------|--------|
| 15 years and above                       | 600 mg             |        |
| 10-14 years                              | 450 mg             |        |
| Children 6-9 years (weight $\geq$ 20 kg) | 300 mg             |        |
| Children 6-9 years (weight $<$ 20 kg)    | 150 mg             |        |
| Children $<$ 5 years                     | 10-15 mg/kg        |        |

**Table S2.** Tuberculosis preventive treatment dosing.

**S2A.** 12 doses of weekly isoniazid (H) and rifapentine (P) for adults and children  $\geq$ 25 kg

| Weight band                    | HP (300mg/300mg) tablets |
|--------------------------------|--------------------------|
| 25-30kg<br>(or $<$ 15ys)       | 2                        |
| $\geq$ 30kg<br>and $\geq$ 15ys | 3                        |

**S2B.** 3 months of daily dosing of child-friendly water-dispersible rifampicin (R) and isoniazid (H) tablets for children  $<$ 25kg

| Weight band | RH (75mg/50mg) tablets |
|-------------|------------------------|
| 4-7kg       | 1                      |
| 8-11kg      | 2                      |
| 12-15kg     | 3                      |
| 16-25kg     | 4                      |

### SUPPLEMENT 3. Participant Information

## PARTICIPANT INFORMATION

### Finding and preventing TB and leprosy cases in Tarawa

#### Dear participant,

We would like to invite you (and your child if relevant) to be treated for latent or sleeping TB.

This document provides information about the study, but we will also explain the study to you in person. You will have the opportunity to ask questions if there is anything that you do not understand or if you want more information. You may refuse participation and this will not be held against you or affect any future access to healthcare.

#### What is this study about?

TB is a disease caused by germs that are coughed into the air by someone who is ill with TB. Most people who are infected with the TB germ do not become ill and do not even know that they are infected, this is referred to as latent or 'sleeping' TB. **Sometimes sleeping TB can wake up and make you ill, which may spread the germ to others.** This research aims to treat all people with TB, those who are ill and those with sleeping TB, so that we can try to eliminate TB from Tarawa. At the same time we are also trying to eliminate leprosy from Tarawa.

This Participant Information Form tells you about the study so that you can know what it involves. Please read this sheet carefully and ask questions about anything that you don't understand or want to know more about.

#### Who is conducting the study?

The study is carried out by researchers at the University of Sydney, Australia, in close collaboration with the Kiribati National TB and Leprosy Programme (NTP). The study is funded by the Australian Medical Research Future Fund and fully supported by the Kiribati Ministry of Health.

### **What will happen?**

This study involves screening for TB (both 'sleeping TB' and illness caused by TB) and leprosy. People who are ill with TB or leprosy will be referred to the TB and Leprosy Programme for appropriate treatment. People with 'sleeping TB' will be offered TB preventive treatment (TPT) and those without any illness or TB infection will be offered leprosy preventive prophylaxis.

To check if someone is able to be given medication for sleeping TB, a study nurse will ask some personal questions. This may include questions about previous and current illnesses, medications used, drinking of alcohol or kava, and questions about pregnancy if you are a woman. Every person older than 20 years will be given a rapid test to see if they have hepatitis B infection, which is important for us to know before considering treatment for 'sleeping TB'. This test involves a finger prick to get a small drop of blood. People with risk factors will need to have a small amount of blood drawn to make sure their liver function stays healthy during the time that they are treated for sleeping TB.

### **How much of my time will the study take?**

We will try to waste as little of your time as possible. To complete the TB and leprosy screening will require you (and your whole household) to be seen on two separate days. This is to complete all the necessary documentation and tests. It is expected that this will take about 2-3 hours of your time on each of these days. Those diagnosed with sleeping TB will need to take tablets once a week for 12 weeks. Tablets will be given out at the mobile health clinic on a monthly basis and can be collected between 9am and 4pm on weekdays.

### **Who can take part in the study?**

Every person older than 3 years of age living in Tarawa and Betio islet is invited to take part.

### **Do I have to be in the study? Can I withdraw from the study once I've started?**

1  
2  
3 Taking part in this study is strongly recommended by the Kiribati Ministry of Health and Medical  
4 Services (MHMS) to get rid of TB and leprosy across Tarawa. However, participation is  
5 completely voluntary and you do not have to take part. Your decision will not affect your current  
6 or future relationship with the researchers, the Kiribati National TB and leprosy Program or the  
7 Ministry of Health.  
8  
9  
10  
11  
12

13 If you decide to take part in the study and then change your mind later, you are free to withdraw  
14 at any time. You can do this by visiting the study clinic and speaking with a study nurse who  
15 will give you exit information and advice on how to stay healthy from TB in the future.  
16  
17  
18

19 If you decide to withdraw from the study, we will not collect any further information from you.  
20 Information that we have already collected will be kept in our study records and may be  
21 included in the study results.  
22  
23  
24  
25

### 26 **Are there any costs or risks associated with being in the study?**

27 There are no costs associated with study participation. Mobile study clinics will be  
28 conveniently situated to be easily accessible and all study tests or treatment will be funded by  
29 the study.  
30  
31  
32  
33

34 If treatment for 'sleeping TB' is provided it is normal to feel a bit tired and to have bright orange  
35 urine while you are taking the tablets. Rarely people may develop some of the symptoms  
36 below, in which case it is important to inform us immediately. Rare symptoms to look out for  
37 include:  
38  
39  
40  
41  
42

- 43 • ongoing nausea, vomiting or loss of appetite
  - 44 • new rash or itchy skin
  - 45 • yellowing skin or eyes
  - 46 • tingling or numbness in fingers or toes
  - 47 • any other symptoms of concern to you
- 48  
49  
50  
51  
52  
53  
54  
55  
56  
57  
58  
59  
60

1  
2  
3 Study nurses and doctors are available Monday to Friday, 9am to 4pm to see anyone who is  
4 feeling sick and thinks this may be due to their treatment. You may also call the 24-hour  
5 treatment hotline using the number on the back of your treatment card (TPT passport).  
6  
7  
8

9  
10 **Are there any benefits associated with being in the study?**

11 Yes, there are major benefits to yourself and the wider community of Tarawa, including Betio  
12 islet  
13

- 14 • You (and your child) will get treatment for TB or leprosy if required
- 15 • You (and your child) will get treatment for sleeping TB (TPT) or to keep  
16 leprosy away
- 17 • You will help to eliminate TB and leprosy from Tarawa
- 18 • Study results will help other Pacific Island nations to eliminate TB and  
19 leprosy in the future
- 20
- 21
- 22
- 23
- 24
- 25
- 26
- 27
- 28
- 29
- 30

31 **What if I have a complaint or any concerns about the study?**

32 This research has been reviewed by an independent group of people called a Human  
33 Research Ethics Committee (HREC) at the University of Sydney and the Kiribati Ministry of  
34 Health and Medical Services.  
35

36 If you are concerned about the way this study is being conducted please inform the study  
37 team; we want to learn and hear how we can improve things. If you wish to make a complaint  
38 to someone independent then please contact any of the people listed below.  
39

40 Terotia Tabwaka Kelese, Human Resource Officer, Republic of Kiribati

41 **Email:** [ttabwaka@gmail.com](mailto:ttabwaka@gmail.com)

42 or

43 The Manager, Ethics Administration, University of Sydney:

44 **Telephone:** +61 2 8627 8176

45 **Email:** [human.ethics@sydney.edu.au](mailto:human.ethics@sydney.edu.au)

46 **Fax:** +61 2 8627 8177 (Facsimile)



## Ethical Approval

This research plan (protocol) was approved by the ethics committee of the faculty of medicine and health at the University of Sydney. This helps to ensure that we do everything possible to keep you safe and to respect your rights and privacy at all times.

## We thank you for your time and cooperation.

The PEARL Research Team with the support of the Kiribati National TB and Leprosy Control Programmes. Further information can be found at [www.thepearlstudy.org](http://www.thepearlstudy.org)

## On behalf of the Kiribati Health Secretary

.....

## SUPPLEMENT 4. Informed Consent Form

**INFORMED CONSENT PROCESS FORM**

**Date of informed consent**   Today D-M-Y

**Does the participant have capacity to consent?**

Yes

No - young person <18 years of age

No - disability

No - other reason reset

**Name of Consenting Guardian**

**Relationship of consenting guardian**

parent

spouse

grandparent

aunt/uncle

sibling

other relative

non-relative guardian reset

**Does the participant assent to participate in the study?**

Yes

No reset

**Does the participant/primary caregiver agree to participate in study?**

Yes

No reset

**Can participant/caregiver read Kiribati?**

Yes

No reset

**Can participant/caregiver read English?**

Yes

No reset

**Participant information given and all participant questions answered?**

Yes

No reset

**Participant is aware that this is a public health intervention endorsed and supported by the Kiribati Ministry of Health and Medical Services?**

Yes

No reset

**Participant is aware that screen may involve providing sputum or blood samples?**

1. Yes/ Yes

0. No/ No reset

**Date & Time Participant/caregiver signed documentation of consent**    Now D-M-Y H:M

**Sign**

 [Add signature](#)

**Other comments**



## Mass drug administration for leprosy control in Kiribati: The COMBINE protocol

SPIRIT 2013 Checklist: Recommended items to address in a clinical trial protocol and related documents\*

| Section/item                      | Item No | Description                                                                                                                                                                                                                                                                              | Addressed on page number |
|-----------------------------------|---------|------------------------------------------------------------------------------------------------------------------------------------------------------------------------------------------------------------------------------------------------------------------------------------------|--------------------------|
| <b>Administrative information</b> |         |                                                                                                                                                                                                                                                                                          |                          |
| Title                             | 1       | Descriptive title identifying the study design, population, interventions, and, if applicable, trial acronym                                                                                                                                                                             | 1                        |
| Trial registration                | 2a      | Trial identifier and registry name. If not yet registered, name of intended registry                                                                                                                                                                                                     | NA not a trial           |
|                                   | 2b      | All items from the World Health Organization Trial Registration Data Set                                                                                                                                                                                                                 | NA not a trial           |
| Protocol version                  | 3       | Date and version identifier                                                                                                                                                                                                                                                              | 3                        |
| Funding                           | 4       | Sources and types of financial, material, and other support                                                                                                                                                                                                                              | 22                       |
| Roles and responsibilities        | 5a      | Names, affiliations, and roles of protocol contributors                                                                                                                                                                                                                                  | 1-2; 22                  |
|                                   | 5b      | Name and contact information for the trial sponsor                                                                                                                                                                                                                                       | 22                       |
|                                   | 5c      | Role of study sponsor and funders, if any, in study design; collection, management, analysis, and interpretation of data; writing of the report; and the decision to submit the report for publication, including whether they will have ultimate authority over any of these activities | 22                       |
|                                   | 5d      | Composition, roles, and responsibilities of the coordinating centre, steering committee, endpoint adjudication committee, data management team, and other individuals or groups overseeing the trial, if applicable (see Item 21a for data monitoring committee)                         | 18-19                    |

|    |                                                           |     |                                                                                                               |                  |
|----|-----------------------------------------------------------|-----|---------------------------------------------------------------------------------------------------------------|------------------|
| 1  | <b>Introduction</b>                                       |     |                                                                                                               |                  |
| 2  |                                                           |     |                                                                                                               |                  |
| 3  | Background and                                            | 6a  | Description of research question and justification for undertaking the trial, including summary of relevant   | 7-9              |
| 4  | rationale                                                 |     | studies (published and unpublished) examining benefits and harms for each intervention                        |                  |
| 5  |                                                           |     |                                                                                                               |                  |
| 6  |                                                           | 6b  | Explanation for choice of comparators                                                                         | 10               |
| 7  |                                                           |     |                                                                                                               |                  |
| 8  | Objectives                                                | 7   | Specific objectives or hypotheses                                                                             | 10               |
| 9  |                                                           |     |                                                                                                               |                  |
| 10 | Trial design                                              | 8   | Description of trial design including type of trial (eg, parallel group, crossover, factorial, single group), |                  |
| 11 |                                                           |     | allocation ratio, and framework (eg, superiority, equivalence, noninferiority, exploratory)                   | 10               |
| 12 |                                                           |     |                                                                                                               |                  |
| 13 |                                                           |     |                                                                                                               |                  |
| 14 | <b>Methods: Participants, interventions, and outcomes</b> |     |                                                                                                               |                  |
| 15 |                                                           |     |                                                                                                               |                  |
| 16 | Study setting                                             | 9   | Description of study settings (eg, community clinic, academic hospital) and list of countries where data will | 10-12            |
| 17 |                                                           |     | be collected. Reference to where list of study sites can be obtained                                          |                  |
| 18 |                                                           |     |                                                                                                               |                  |
| 19 | Eligibility criteria                                      | 10  | Inclusion and exclusion criteria for participants. If applicable, eligibility criteria for study centres and  | 13-14; table 2   |
| 20 |                                                           |     | individuals who will perform the interventions (eg, surgeons, psychotherapists)                               |                  |
| 21 |                                                           |     |                                                                                                               |                  |
| 22 | Interventions                                             | 11a | Interventions for each group with sufficient detail to allow replication, including how and when they will be | 12-14; figure 1; |
| 23 |                                                           |     | administered                                                                                                  | table 2          |
| 24 |                                                           |     |                                                                                                               |                  |
| 25 |                                                           | 11b | Criteria for discontinuing or modifying allocated interventions for a given trial participant (eg, drug dose  | 13; 18-19;       |
| 26 |                                                           |     | change in response to harms, participant request, or improving/worsening disease)                             | Supplement 2     |
| 27 |                                                           |     |                                                                                                               |                  |
| 28 |                                                           | 11c | Strategies to improve adherence to intervention protocols, and any procedures for monitoring adherence        | 12-15; 18-19     |
| 29 |                                                           |     | (eg, drug tablet return, laboratory tests)                                                                    |                  |
| 30 |                                                           |     |                                                                                                               |                  |
| 31 |                                                           | 11d | Relevant concomitant care and interventions that are permitted or prohibited during the trial                 | 12-15; 18-19; S2 |
| 32 |                                                           |     |                                                                                                               |                  |
| 33 | Outcomes                                                  | 12  | Primary, secondary, and other outcomes, including the specific measurement variable (eg, systolic blood       |                  |
| 34 |                                                           |     | pressure), analysis metric (eg, change from baseline, final value, time to event), method of aggregation (eg, | 16-18            |
| 35 |                                                           |     | median, proportion), and time point for each outcome. Explanation of the clinical relevance of chosen         |                  |
| 36 |                                                           |     | efficacy and harm outcomes is strongly recommended                                                            |                  |
| 37 |                                                           |     |                                                                                                               |                  |
| 38 | Participant timeline                                      | 13  | Time schedule of enrolment, interventions (including any run-ins and washouts), assessments, and visits for   | 10               |
| 39 |                                                           |     | participants. A schematic diagram is highly recommended (see Figure)                                          |                  |
| 40 |                                                           |     |                                                                                                               |                  |
| 41 |                                                           |     |                                                                                                               |                  |
| 42 |                                                           |     |                                                                                                               |                  |
| 43 |                                                           |     |                                                                                                               |                  |
| 44 |                                                           |     |                                                                                                               |                  |
| 45 |                                                           |     |                                                                                                               |                  |
| 46 |                                                           |     |                                                                                                               |                  |

|    |                                                                     |     |                                                                                                                                                                                                                                                                                                                                                                                                              |                        |
|----|---------------------------------------------------------------------|-----|--------------------------------------------------------------------------------------------------------------------------------------------------------------------------------------------------------------------------------------------------------------------------------------------------------------------------------------------------------------------------------------------------------------|------------------------|
| 1  | Sample size                                                         | 14  | Estimated number of participants needed to achieve study objectives and how it was determined, including clinical and statistical assumptions supporting any sample size calculations                                                                                                                                                                                                                        | 17                     |
| 2  |                                                                     |     |                                                                                                                                                                                                                                                                                                                                                                                                              |                        |
| 3  |                                                                     |     |                                                                                                                                                                                                                                                                                                                                                                                                              |                        |
| 4  | Recruitment                                                         | 15  | Strategies for achieving adequate participant enrolment to reach target sample size                                                                                                                                                                                                                                                                                                                          | 15                     |
| 5  |                                                                     |     |                                                                                                                                                                                                                                                                                                                                                                                                              |                        |
| 6  |                                                                     |     |                                                                                                                                                                                                                                                                                                                                                                                                              |                        |
| 7  | <b>Methods: Assignment of interventions (for controlled trials)</b> |     |                                                                                                                                                                                                                                                                                                                                                                                                              |                        |
| 8  | Allocation:                                                         |     |                                                                                                                                                                                                                                                                                                                                                                                                              |                        |
| 9  |                                                                     |     |                                                                                                                                                                                                                                                                                                                                                                                                              |                        |
| 10 | Sequence generation                                                 | 16a | Method of generating the allocation sequence (eg, computer-generated random numbers), and list of any factors for stratification. To reduce predictability of a random sequence, details of any planned restriction (eg, blocking) should be provided in a separate document that is unavailable to those who enrol participants or assign interventions                                                     | NA non-random          |
| 11 |                                                                     |     |                                                                                                                                                                                                                                                                                                                                                                                                              |                        |
| 12 |                                                                     |     |                                                                                                                                                                                                                                                                                                                                                                                                              |                        |
| 13 |                                                                     |     |                                                                                                                                                                                                                                                                                                                                                                                                              |                        |
| 14 |                                                                     |     |                                                                                                                                                                                                                                                                                                                                                                                                              |                        |
| 15 |                                                                     |     |                                                                                                                                                                                                                                                                                                                                                                                                              |                        |
| 16 | Allocation concealment mechanism                                    | 16b | Mechanism of implementing the allocation sequence (eg, central telephone; sequentially numbered, opaque, sealed envelopes), describing any steps to conceal the sequence until interventions are assigned                                                                                                                                                                                                    | NA population-wide     |
| 17 |                                                                     |     |                                                                                                                                                                                                                                                                                                                                                                                                              |                        |
| 18 |                                                                     |     |                                                                                                                                                                                                                                                                                                                                                                                                              |                        |
| 19 |                                                                     |     |                                                                                                                                                                                                                                                                                                                                                                                                              |                        |
| 20 | Implementation                                                      | 16c | Who will generate the allocation sequence, who will enrol participants, and who will assign participants to interventions                                                                                                                                                                                                                                                                                    | NA population-wide     |
| 21 |                                                                     |     |                                                                                                                                                                                                                                                                                                                                                                                                              |                        |
| 22 |                                                                     |     |                                                                                                                                                                                                                                                                                                                                                                                                              |                        |
| 23 |                                                                     |     |                                                                                                                                                                                                                                                                                                                                                                                                              |                        |
| 24 | Blinding (masking)                                                  | 17a | Who will be blinded after assignment to interventions (eg, trial participants, care providers, outcome assessors, data analysts), and how                                                                                                                                                                                                                                                                    | NA open-label          |
| 25 |                                                                     |     |                                                                                                                                                                                                                                                                                                                                                                                                              |                        |
| 26 |                                                                     |     |                                                                                                                                                                                                                                                                                                                                                                                                              |                        |
| 27 |                                                                     | 17b | If blinded, circumstances under which unblinding is permissible, and procedure for revealing a participant's allocated intervention during the trial                                                                                                                                                                                                                                                         | NA open-label          |
| 28 |                                                                     |     |                                                                                                                                                                                                                                                                                                                                                                                                              |                        |
| 29 |                                                                     |     |                                                                                                                                                                                                                                                                                                                                                                                                              |                        |
| 30 |                                                                     |     |                                                                                                                                                                                                                                                                                                                                                                                                              |                        |
| 31 | <b>Methods: Data collection, management, and analysis</b>           |     |                                                                                                                                                                                                                                                                                                                                                                                                              |                        |
| 32 |                                                                     |     |                                                                                                                                                                                                                                                                                                                                                                                                              |                        |
| 33 | Data collection methods                                             | 18a | Plans for assessment and collection of outcome, baseline, and other trial data, including any related processes to promote data quality (eg, duplicate measurements, training of assessors) and a description of study instruments (eg, questionnaires, laboratory tests) along with their reliability and validity, if known. Reference to where data collection forms can be found, if not in the protocol | 16-18;<br>Supplement 1 |
| 34 |                                                                     |     |                                                                                                                                                                                                                                                                                                                                                                                                              |                        |
| 35 |                                                                     |     |                                                                                                                                                                                                                                                                                                                                                                                                              |                        |
| 36 |                                                                     |     |                                                                                                                                                                                                                                                                                                                                                                                                              |                        |
| 37 |                                                                     |     |                                                                                                                                                                                                                                                                                                                                                                                                              |                        |
| 38 |                                                                     |     |                                                                                                                                                                                                                                                                                                                                                                                                              |                        |
| 39 |                                                                     | 18b | Plans to promote participant retention and complete follow-up, including list of any outcome data to be collected for participants who discontinue or deviate from intervention protocols                                                                                                                                                                                                                    | 18-19                  |
| 40 |                                                                     |     |                                                                                                                                                                                                                                                                                                                                                                                                              |                        |
| 41 |                                                                     |     |                                                                                                                                                                                                                                                                                                                                                                                                              |                        |
| 42 |                                                                     |     |                                                                                                                                                                                                                                                                                                                                                                                                              |                        |

1 Data management 19 Plans for data entry, coding, security, and storage, including any related processes to promote data quality 18  
 2 (eg, double data entry; range checks for data values). Reference to where details of data management  
 3 procedures can be found, if not in the protocol  
 4

5 Statistical methods 20a Statistical methods for analysing primary and secondary outcomes. Reference to where other details of the 16-18  
 6 statistical analysis plan can be found, if not in the protocol  
 7

8 20b Methods for any additional analyses (eg, subgroup and adjusted analyses) 16-18  
 9

10 20c Definition of analysis population relating to protocol non-adherence (eg, as randomised analysis), and any 16-18  
 11 statistical methods to handle missing data (eg, multiple imputation)  
 12  
 13

14 **Methods: Monitoring**  
 15

16 Data monitoring 21a Composition of data monitoring committee (DMC); summary of its role and reporting structure; statement of 18-19  
 17 whether it is independent from the sponsor and competing interests; and reference to where further details  
 18 about its charter can be found, if not in the protocol. Alternatively, an explanation of why a DMC is not  
 19 needed  
 20

21 21b Description of any interim analyses and stopping guidelines, including who will have access to these interim 18-19  
 22 results and make the final decision to terminate the trial  
 23  
 24

25 Harms 22 Plans for collecting, assessing, reporting, and managing solicited and spontaneously reported adverse 18-19  
 26 events and other unintended effects of trial interventions or trial conduct  
 27

28 Auditing 23 Frequency and procedures for auditing trial conduct, if any, and whether the process will be independent 19  
 29 from investigators and the sponsor  
 30  
 31

32 **Ethics and dissemination**  
 33

34 Research ethics 24 Plans for seeking research ethics committee/institutional review board (REC/IRB) approval 4-5  
 35 approval  
 36

37 Protocol 25 Plans for communicating important protocol modifications (eg, changes to eligibility criteria, outcomes, 18-19  
 38 amendments analyses) to relevant parties (eg, investigators, REC/IRBs, trial participants, trial registries, journals,  
 39 regulators)  
 40  
 41  
 42  
 43  
 44  
 45  
 46

|    |                               |     |                                                                                                                                                                                                                                                                                     |                |
|----|-------------------------------|-----|-------------------------------------------------------------------------------------------------------------------------------------------------------------------------------------------------------------------------------------------------------------------------------------|----------------|
| 1  | Consent or assent             | 26a | Who will obtain informed consent or assent from potential trial participants or authorised surrogates, and how (see Item 32)                                                                                                                                                        | 18-19; Table 2 |
| 2  |                               |     |                                                                                                                                                                                                                                                                                     |                |
| 3  |                               |     |                                                                                                                                                                                                                                                                                     |                |
| 4  |                               | 26b | Additional consent provisions for collection and use of participant data and biological specimens in ancillary studies, if applicable                                                                                                                                               | 18             |
| 5  |                               |     |                                                                                                                                                                                                                                                                                     |                |
| 6  |                               |     |                                                                                                                                                                                                                                                                                     |                |
| 7  | Confidentiality               | 27  | How personal information about potential and enrolled participants will be collected, shared, and maintained in order to protect confidentiality before, during, and after the trial                                                                                                | 18-19          |
| 8  |                               |     |                                                                                                                                                                                                                                                                                     |                |
| 9  |                               |     |                                                                                                                                                                                                                                                                                     |                |
| 10 | Declaration of interests      | 28  | Financial and other competing interests for principal investigators for the overall trial and each study site                                                                                                                                                                       | 22-23          |
| 11 |                               |     |                                                                                                                                                                                                                                                                                     |                |
| 12 |                               |     |                                                                                                                                                                                                                                                                                     |                |
| 13 | Access to data                | 29  | Statement of who will have access to the final trial dataset, and disclosure of contractual agreements that limit such access for investigators                                                                                                                                     | 18-19          |
| 14 |                               |     |                                                                                                                                                                                                                                                                                     |                |
| 15 |                               |     |                                                                                                                                                                                                                                                                                     |                |
| 16 | Ancillary and post-trial care | 30  | Provisions, if any, for ancillary and post-trial care, and for compensation to those who suffer harm from trial participation                                                                                                                                                       | NA             |
| 17 |                               |     |                                                                                                                                                                                                                                                                                     |                |
| 18 |                               |     |                                                                                                                                                                                                                                                                                     |                |
| 19 |                               |     |                                                                                                                                                                                                                                                                                     |                |
| 20 | Dissemination policy          | 31a | Plans for investigators and sponsor to communicate trial results to participants, healthcare professionals, the public, and other relevant groups (eg, via publication, reporting in results databases, or other data sharing arrangements), including any publication restrictions | 4-5            |
| 21 |                               |     |                                                                                                                                                                                                                                                                                     |                |
| 22 |                               |     |                                                                                                                                                                                                                                                                                     |                |
| 23 |                               |     |                                                                                                                                                                                                                                                                                     |                |
| 24 |                               | 31b | Authorship eligibility guidelines and any intended use of professional writers                                                                                                                                                                                                      | 22-23          |
| 25 |                               |     |                                                                                                                                                                                                                                                                                     |                |
| 26 |                               | 31c | Plans, if any, for granting public access to the full protocol, participant-level dataset, and statistical code                                                                                                                                                                     | NA             |
| 27 |                               |     |                                                                                                                                                                                                                                                                                     |                |
| 28 |                               |     |                                                                                                                                                                                                                                                                                     |                |
| 29 | <b>Appendices</b>             |     |                                                                                                                                                                                                                                                                                     |                |
| 30 |                               |     |                                                                                                                                                                                                                                                                                     |                |
| 31 | Informed consent materials    | 32  | Model consent form and other related documentation given to participants and authorised surrogates                                                                                                                                                                                  | Supplement 3-4 |
| 32 |                               |     |                                                                                                                                                                                                                                                                                     |                |
| 33 |                               |     |                                                                                                                                                                                                                                                                                     |                |
| 34 | Biological specimens          | 33  | Plans for collection, laboratory evaluation, and storage of biological specimens for genetic or molecular analysis in the current trial and for future use in ancillary studies, if applicable                                                                                      | 18             |
| 35 |                               |     |                                                                                                                                                                                                                                                                                     |                |
| 36 |                               |     |                                                                                                                                                                                                                                                                                     |                |

\*It is strongly recommended that this checklist be read in conjunction with the SPIRIT 2013 Explanation & Elaboration for important clarification on the items. Amendments to the protocol should be tracked and dated. The SPIRIT checklist is copyrighted by the SPIRIT Group under the Creative Commons [“Attribution-NonCommercial-NoDerivs 3.0 Unported”](https://creativecommons.org/licenses/by-nc-nd/3.0/) license.

# BMJ Open

## The effectiveness of population-wide screening and mass drug administration for leprosy control in Kiribati: The COMBINE protocol

|                                 |                                                                                                                                                                                                                                                                                                                                                                                                                                                                                                                                                                                                                                                                                                                                                                                                                                                                                                                                                                                                                                                                                                                                                                                                                                                                                                                                                                                                                                                                                                                                                                                                                                                                                                                                                                                                       |
|---------------------------------|-------------------------------------------------------------------------------------------------------------------------------------------------------------------------------------------------------------------------------------------------------------------------------------------------------------------------------------------------------------------------------------------------------------------------------------------------------------------------------------------------------------------------------------------------------------------------------------------------------------------------------------------------------------------------------------------------------------------------------------------------------------------------------------------------------------------------------------------------------------------------------------------------------------------------------------------------------------------------------------------------------------------------------------------------------------------------------------------------------------------------------------------------------------------------------------------------------------------------------------------------------------------------------------------------------------------------------------------------------------------------------------------------------------------------------------------------------------------------------------------------------------------------------------------------------------------------------------------------------------------------------------------------------------------------------------------------------------------------------------------------------------------------------------------------------|
| Journal:                        | <i>BMJ Open</i>                                                                                                                                                                                                                                                                                                                                                                                                                                                                                                                                                                                                                                                                                                                                                                                                                                                                                                                                                                                                                                                                                                                                                                                                                                                                                                                                                                                                                                                                                                                                                                                                                                                                                                                                                                                       |
| Manuscript ID                   | bmjopen-2022-065369.R2                                                                                                                                                                                                                                                                                                                                                                                                                                                                                                                                                                                                                                                                                                                                                                                                                                                                                                                                                                                                                                                                                                                                                                                                                                                                                                                                                                                                                                                                                                                                                                                                                                                                                                                                                                                |
| Article Type:                   | Protocol                                                                                                                                                                                                                                                                                                                                                                                                                                                                                                                                                                                                                                                                                                                                                                                                                                                                                                                                                                                                                                                                                                                                                                                                                                                                                                                                                                                                                                                                                                                                                                                                                                                                                                                                                                                              |
| Date Submitted by the Author:   | 11-Apr-2023                                                                                                                                                                                                                                                                                                                                                                                                                                                                                                                                                                                                                                                                                                                                                                                                                                                                                                                                                                                                                                                                                                                                                                                                                                                                                                                                                                                                                                                                                                                                                                                                                                                                                                                                                                                           |
| Complete List of Authors:       | <p>Coleman, Mikaela; The University of Sydney, Faculty of Medicine and Health; The Centenary Institute at the University of Sydney, Tuberculosis Research Program</p> <p>Hill, Jeremy; The University of Sydney, Faculty of Medicine and Health; The Centenary Institute at the University of Sydney, Tuberculosis Research Program</p> <p>Timeon, Eretii; Government of the Republic of Kiribati Ministry of Health and Medical Services</p> <p>Rimon, Erej; Government of the Republic of Kiribati Ministry of Health and Medical Services</p> <p>Bauro, Temea; Government of the Republic of Kiribati Ministry of Health and Medical Services</p> <p>Ioteba, Nabura; Pasifika Futures Ltd; Pacific Leprosy Foundation</p> <p>Cunanan, Arturo; Pacific Leprosy Foundation; Culion Sanatorium and General Hospital</p> <p>Douglas, Nicholas M; Christchurch Hospital, Department of Infectious Diseases; University of Otago, Department of Medicine</p> <p>Islam, Tauhid; Division of Programmes for Disease Control</p> <p>Tomlinson, Jill; Pacific Leprosy Foundation</p> <p>Campbell, Patrick O; Christchurch Hospital, Department of Infectious Diseases</p> <p>Williman, Jonathan; Christchurch School of Medicine and Health Sciences, Public Health and General Practice</p> <p>Priest, Patricia; University of Otago</p> <p>Marais, B; University of Sydney, Faculty of Medicine and Health; The University of Sydney Institute for Infectious Diseases</p> <p>Britton, Warwick; The Centenary Institute at the University of Sydney, Tuberculosis Research Program; Royal Prince Alfred Hospital, Department of Clinical Immunology</p> <p>Chambers, Stephen; The Pacific Leprosy Foundation; University of Otago</p> <p>Christchurch, Department of Pathology and Biomedical Science,</p> |
| <b>Primary Subject Heading</b>: | Infectious diseases                                                                                                                                                                                                                                                                                                                                                                                                                                                                                                                                                                                                                                                                                                                                                                                                                                                                                                                                                                                                                                                                                                                                                                                                                                                                                                                                                                                                                                                                                                                                                                                                                                                                                                                                                                                   |
| Secondary Subject Heading:      | Public health, Epidemiology, Global health, Infectious diseases                                                                                                                                                                                                                                                                                                                                                                                                                                                                                                                                                                                                                                                                                                                                                                                                                                                                                                                                                                                                                                                                                                                                                                                                                                                                                                                                                                                                                                                                                                                                                                                                                                                                                                                                       |
| Keywords:                       | Tropical medicine < INFECTIOUS DISEASES, Public health < INFECTIOUS DISEASES, Tuberculosis < INFECTIOUS DISEASES, Epidemiology < INFECTIOUS DISEASES, EPIDEMIOLOGY                                                                                                                                                                                                                                                                                                                                                                                                                                                                                                                                                                                                                                                                                                                                                                                                                                                                                                                                                                                                                                                                                                                                                                                                                                                                                                                                                                                                                                                                                                                                                                                                                                    |



1  
2  
3  
4  
5  
6  
7  
8  
9  
10  
11  
12  
13  
14  
15  
16  
17  
18  
19  
20  
21  
22  
23  
24  
25  
26  
27  
28  
29  
30  
31  
32  
33  
34  
35  
36  
37  
38  
39  
40  
41  
42  
43  
44  
45  
46  
47  
48  
49  
50  
51  
52  
53  
54  
55  
56  
57  
58  
59  
60



SCHOLARONE™  
Manuscripts

**TITLE**

The effectiveness of population-wide screening and mass drug administration for leprosy control in Kiribati: The COMBINE protocol

**AUTHORS**

Mikaela Coleman<sup>1,2\*</sup>, Jeremy Hill<sup>1,2\*</sup>, Eretii Timeon<sup>3</sup>, Erei Rimon<sup>3</sup>, Temea Bauro<sup>3</sup>, Nabura Ioteba<sup>4,5</sup>, Arturo Cunanan<sup>5,6</sup>, Nicholas M Douglas<sup>7,8,9</sup>, Tauhid Islam<sup>10</sup>, Jill Tomlinson<sup>5</sup>, Patrick O Campbell<sup>7</sup>, Jonathan Williman<sup>8</sup>, Patricia Priest<sup>11</sup>, Ben J Marais<sup>1,12</sup>, Warwick J Britton<sup>1,2,13</sup>, Stephen T Chambers<sup>5,14</sup>

**CORRESPONDING AUTHORS**

\*Dr Mikaela Coleman

Room 5.17, The Centenary Institute,

The University of Sydney

Camperdown, 2050

New South Wales, Australia

Phone: +61 411 419 047

Email: mikaela.coleman@sydney.edu.au

\*Dr Jeremy Hill

Room 5.17, The Centenary Institute,

The University of Sydney

Camperdown, 2050

New South Wales, Australia

Phone: +61 402 544 252

Email: jeremy.hill@sydney.edu.au

**AUTHOR AFFILIATIONS**

1 - Faculty of Medicine and Health, The University of Sydney, Sydney, New South Wales, Australia

2 - Tuberculosis Research Program at the Centenary Institute, The University of Sydney, Sydney, New South Wales, Australia

- 1  
2  
3 3 - Ministry of Health and Medical Services, Tarawa, Kiribati  
4  
5 4 – Pasifika Futures Ltd, Etu Pasifika Christchurch, New Zealand  
6  
7 5 - Pacific Leprosy Foundation, Christchurch, New Zealand  
8  
9 6 – Culion Sanatorium and General Hospital, Culion, Philippines  
10  
11 7 – Department of Infectious Diseases, Christchurch Hospital, Christchurch, New Zealand  
12  
13 8 – Department of Medicine, University of Otago, Christchurch, New Zealand  
14  
15 9 – Division of Global and Tropical Health, Menzies School of Health Research, Charles Darwin  
16  
17 University, Darwin, Australia  
18  
19 10 - End TB and Leprosy Unit, Division of Programmes for Disease Control, WHO Regional Office for  
20  
21 the Western Pacific, Manila, Philippines  
22  
23 11 – Department of Epidemiology and Public Health, The University of Otago, Dunedin  
24  
25 Dunedin, New Zealand.  
26  
27 12 - The University of Sydney Institute for Infectious Diseases, Sydney, New South Wales, Australia.  
28  
29 13 - Department of Clinical Immunology, Royal Prince Alfred Hospital, Camperdown, New South  
30  
31 Wales, Australia  
32  
33 14 – Department of Pathology and Biomedical Science, The University of Otago, Christchurch, New  
34  
35 Zealand

**WORD COUNT:**Abstract: **300**Strengths and limitations: **124**Main text: **4355**Contact, Acknowledgements, Funding: **236**References: **30**Tables: **3**Figures: **1**Supplement: **5****KEYWORDS:**

1  
2 leprosy; Hansen's disease; mass drug administration; MDA; population; contacts;  
3  
4 prevention; prophylaxis; single-dose rifampicin; SDR; intervention; post-exposure  
5  
6 prophylaxis; PEP; active case finding; ACF; universal leprosy prophylaxis; mass  
7  
8 chemoprophylaxis; rifapentine; Pacific; Kiribati  
9  
10  
11  
12

13 **PROTOCOL VERSION:**

14  
15 2  
16  
17  
18  
19  
20  
21  
22  
23  
24  
25  
26  
27  
28  
29  
30  
31  
32  
33  
34  
35  
36  
37  
38  
39  
40  
41  
42  
43  
44  
45  
46  
47  
48  
49  
50  
51  
52  
53  
54  
55  
56  
57  
58  
59  
60

For peer review only

## ABSTRACT

Progress towards leprosy elimination is threatened by increasing incidence in 'hot-spot' areas where more effective control strategies are urgently required. In these areas, active case finding and leprosy prevention limited to known contacts is insufficient for control. Population-wide active case-finding together with universal prevention through mass drug administration (MDA) has been shown to be effective in 'hot-spot' areas, but is logistically challenging and expensive. Combining leprosy screening and MDA with other population-wide screening activities such as for tuberculosis may increase programme efficiency. There has been limited evaluation of the feasibility and effectiveness of combined screening and MDA interventions. The COMBINE study aims to bridge this knowledge gap.

### Methods and analysis

This implementation study will assess the feasibility and effectiveness of active leprosy case-finding and treatment, combined with MDA using either single-dose rifampicin or rifamycin-containing tuberculosis preventive or curative treatment, for reducing leprosy incidence in Kiribati. The leprosy programme will run over 2022–2025 in concert with population-wide tuberculosis screening-and-treatment in South Tarawa. The primary research question is to what extent the intervention reduces the annual leprosy new case detection rate (NCDR) in adults and children compared to routine screening and post-exposure prophylaxis (PEP) among close contacts (baseline leprosy control activities). Comparisons will be made with 1) the pre-intervention NCDR separably amongst adults and children in South Tarawa (before-after study) and 2) the corresponding NCDRs in the rest of the country. Additionally, the post-intervention prevalence of leprosy obtained from a survey of a 'hot-spot' sub-population will be compared to prevalence documented during the intervention. The intervention will be implemented in collaboration with the Kiribati National Leprosy Program.

### Ethics and dissemination

1  
2 Approval has been obtained from the Kiribati Ministry of Health and Medical Services (MHMS),  
3  
4 the University of Otago (H22/111) and the University of Sydney (2021/127) Human Research  
5  
6 Ethics Committees. Findings will be shared with the MHMS, local communities and  
7  
8 internationally through publication.  
9  
10  
11  
12  
13  
14  
15  
16  
17  
18  
19  
20  
21  
22  
23  
24  
25  
26  
27  
28  
29  
30  
31  
32  
33  
34  
35  
36  
37  
38  
39  
40  
41  
42  
43  
44  
45  
46  
47  
48  
49  
50  
51  
52  
53  
54  
55  
56  
57  
58  
59  
60

### Strengths and limitations of this study

- Designed for both rapid and sustained reduction in leprosy prevalence using a combination of active case-finding with treatment and mass drug administration for population-wide chemoprophylaxis
- Geographically isolated island with high rates of leprosy, relatively small population and limited population mobility, facilitating proof-of-principle testing with low risk of dilution of intervention effect
- Dovetailing of existing leprosy and tuberculosis elimination activities has the potential to maximise efficiency and impact, especially in settings with a high-incidence of both diseases
- The absence of randomisation limits attribution of effect to the intervention; partially compensated for by employing multiple comparator assessments
- Despite the geographic isolation, the long implementation period (3 years) may allow leprosy re-infection events to occur in the community through inter-island travel

## INTRODUCTION

Since the 1991 World Health Association resolution to eliminate leprosy,<sup>[1]</sup><sup>1</sup> tremendous progress has been made towards global leprosy elimination.<sup>2</sup> However, despite enhanced early detection and availability of effective treatment and prevention options, progress has reversed in some leprosy 'hot-spots' (regions of high leprosy endemicity).<sup>3</sup> National leprosy disease and disability rates have stagnated in most of the 23 leprosy global priority countries with an increase in grade-2 disability reported in 2020 for 7 of these countries, including Kiribati.<sup>3</sup> Global de-funding for leprosy control and health system prioritisation of diseases with more obvious and immediate clinical presentations than leprosy have exacerbated these challenges. Point prevalence surveys in leprosy endemic regions reveal many undetected cases, with major case detection and reporting gaps responsible for the 'missing millions'.<sup>4-10</sup> Although the relatively low incidence of childhood leprosy (6.8% of all newly detected cases) indicates that transmission has declined globally, this is not true in all areas with cases among children increasing in some countries.<sup>3</sup>

The ongoing leprosy disease burden in the Pacific Island nation of Kiribati is emblematic of the global situation in high burden countries. Kiribati has one of the highest leprosy incidence rates in the world and these rates are on the rise; the Ministry of Health and Medical Services (MHMS) reports a 17% increase in incidence from 2010 to 2020, with 15.9 new cases detected per 10,000 people in 2020.<sup>3</sup> Curative and preventive services are routinely provided by the National Leprosy Program (NLP) in line with World Health Organization (WHO) guidelines, in partnership with the Pacific Leprosy Foundation (PLF). The NLP screens contacts for leprosy and, if active leprosy is not identified, provides single-dose rifampicin for post-exposure prophylaxis (SDR-PEP) immediately and one year later. In addition, contacts are screened for signs and symptoms of leprosy annually for four more years after the initial screening. SDR-PEP was introduced in 2018 and has since been provided to 89% of all eligible leprosy contacts recorded since 2010, which amounts to screening and prophylaxis for ~9% of the total population of Kiribati (10,406 contacts). Despite these interventions, most new leprosy



1  
2 cases in Kiribati are detected passively rather than by contact tracing with many presenting  
3 with advanced disease; almost half of all cases have multibacillary disease. These cases have  
4 long infectious periods before diagnosis and are an important source of transmission in the  
5 community.  
6  
7  
8  
9

10  
11  
12  
13 To make an impact on the leprosy epidemic in Kiribati and to meet the ambitious Zero Leprosy  
14 target to halve global leprosy incidence by 2030,<sup>11</sup> bold new strategies are needed. Such  
15 strategies should be designed to break the chain of leprosy transmission and to reduce the  
16 risk of disease progression in highly endemic regions. One avenue for exploration is to expand  
17 the reach of active case-finding (ACF) and preventive interventions in high-risk populations.  
18 In previous studies, regions with smaller populations, but similar disease burdens to Kiribati,  
19 have benefitted from population wide ACF and mass drug administration (MDA) with SDR to  
20 reduce the risk of progression to leprosy disease in the community, irrespective of contact  
21 status.<sup>12 13</sup> Population-wide programmes can be very challenging to implement on a large  
22 scale because of the logistical demands of reaching whole populations, difficulties achieving  
23 acceptability and buy-in, poor access to microbial confirmation in resourced-limited settings,  
24 a lack of clinical expertise for diagnoses, and challenges in mobilising resources to support  
25 population-wide programmes. The result is that leprosy MDA for large populations (>5,000  
26 people) is often considered unfeasible in the regions where it is most needed.  
27  
28  
29  
30  
31  
32  
33  
34  
35  
36  
37  
38  
39  
40  
41  
42  
43  
44

45 Twenty-one of the 23 leprosy priority countries also have endemic tuberculosis (TB).<sup>3</sup> The  
46 relatively greater funding for TB and the global movement towards expanded ACF for TB,<sup>14-16</sup>  
47 the shared susceptibility of *Mycobacterium leprae* and *Mycobacterium tuberculosis* to  
48 rifamycins for preventive therapy, and the similar social determinants of transmission and  
49 disease all present opportunities for leprosy control programs to leverage TB programmes for  
50 mutual gain. Where the burden of both diseases is sufficiently high, this can take the form of  
51 combined population wide ACF and MDA chemoprophylaxis activities. In South Tarawa, the  
52 PEARL study (Pathway to the Elimination of Antibiotic Resistant and Latent tuberculosis (as  
53  
54  
55  
56  
57  
58  
59  
60

1  
2 well as leprosy) in the Pacific)<sup>17</sup> provides the mechanism by which a combined intervention  
3 may be delivered at a fraction of the cost of a separate programme. Modelling of a mass  
4 chemoprophylaxis strategy for leprosy suggests this is an effective strategy,<sup>18</sup> and combining  
5 mass screening and treatment for TB are expected to greatly increase efficiency and cost-  
6 effectiveness. South Tarawa was chosen for the PEARL study as it is the centre with the  
7 highest population density in Kiribati and has the highest estimated incidence of TB and  
8 leprosy.  
9  
10  
11  
12  
13  
14  
15  
16  
17  
18

19 The COMBINE study is designed to inform programmatic strategies towards leprosy  
20 elimination in the Pacific and elsewhere. We aim to assess the effectiveness, feasibility,  
21 efficiency and cost of a programme of leprosy screening and mass rifamycin-based  
22 chemoprophylaxis delivered in combination with a TB screening, treatment and prevention  
23 initiative in Kiribati.<sup>17</sup> We will provide evidence for practicable means of integrating leprosy  
24 control with other communicable disease programmes that can be used to effectively  
25 accelerate leprosy prevention and care in endemic regions. Many of the research questions  
26 addressed by the COMBINE study must be answered to achieve scalable and durable leprosy  
27 elimination in countries like Kiribati.  
28  
29  
30  
31  
32  
33  
34  
35  
36  
37  
38  
39  
40  
41  
42  
43  
44  
45  
46  
47  
48  
49  
50  
51  
52  
53  
54  
55  
56  
57  
58  
59  
60

## OBJECTIVES

The COMBINE study assesses the feasibility and effectiveness of leprosy screening and MDA chemoprophylaxis in a highly endemic population using a programmatic approach that:

- Investigates whether combined population-wide screening and treatment for leprosy and TB together with MDA chemoprophylaxis and ongoing SDR-PEP for contacts can achieve rapid and durable reductions in leprosy incidence;
- Evaluates the effectiveness of leprosy MDA chemoprophylaxis using a pragmatic combination of either SDR or rifamycin-based TB preventive treatment;
- Measures the cost of MDA delivery when integrated with infrastructure from an existing population-wide screening program (the PEARL study<sup>17</sup>);
- Documents operational strategies to feasibly integrate enhanced leprosy and TB control efforts, and to reduce leprosy associated stigma.

## METHODS AND ANALYSIS

### Study design

COMBINE is a pragmatic controlled non-randomised before-and-after implementation study designed to evaluate the impact of the intervention upon leprosy NCDR. The COMBINE study will leverage infrastructure created by the PEARL study to deliver population-wide leprosy ACF and chemoprophylaxis. We will deliver the intervention over 3 years commencing November 2022 and ending November 2025, aiming to reach the entire population of South Tarawa in that time. The timeline of planned activities for the COMBINE study is illustrated in Supplementary Figure 1.

### Setting

The Republic of Kiribati is a geographically isolated nation in the Pacific region comprising 32 atolls and one raised coral island spread over a land territory of 811 km<sup>2</sup> amid an ocean territory of 3.5 million km<sup>2</sup>. The intervention site is the capital atoll of South Tarawa (population

63,439) which is the densely-populated 'transmission hot-spot' and amplifier of leprosy disease throughout the country (see **Table 1** for baseline characteristics of the study population).<sup>19</sup> Kiribati has only one specialised leprosy clinic which is located in South Tarawa. Residents live in village communities on a chain of low-lying islets connected by a causeway. Visitors from 'outer islands' to the capital often stay for an extended period. Anecdotally, this pattern of travel in and out of South Tarawa is associated with clusters of TB and leprosy in outer island communities.

While diagnosis and contact-tracing practices have been improved and standardised since 2010, it is uncertain whether the upward trend in new case detection rate (NCDR) in Kiribati over the past decade is an accurate measure of worsening epidemic control or reflective of enhanced case detection. What is clear, is that child NCDR has exceeded 30% of all newly detected cases for the past 3-years (2019-2021), indicating that the background community-level leprosy transmission has outpaced the potential to control the disease burden with existing leprosy programme interventions. Our study reports NCDR amongst both adults and children to examine variations in leprosy distribution between the two groups.

**Table 1.** Baseline characteristics of the population and intervention group

|                                                     | <b>Intervention group</b><br><i>South Tarawa</i> | <b>No intervention group</b><br><i>Rest of Kiribati</i> | <b>Whole of Kiribati</b> |
|-----------------------------------------------------|--------------------------------------------------|---------------------------------------------------------|--------------------------|
| <b>Population, 2020 *</b>                           | 63,439                                           | 56,501                                                  | 119,940                  |
| - <b>Females (%)</b>                                | 32,981 (52.0%)                                   | 27,805 (49.2%)                                          | 60,786 (50.7%)           |
| - <b>Median age (years)</b>                         | 23.2                                             | 22.3                                                    | 22.9                     |
| - <b>Average household size (people)</b>            | 6.6                                              | 4.9                                                     | 5.0                      |
| - <b>Net migration rate (% of population)</b>       | 2%                                               | 0.7%                                                    | 1.4%                     |
| <b>Urbanisation</b>                                 | Majority urban;<br>some rural                    | Majority rural;<br>some urban                           | Mixed urban and<br>rural |
| <b>BCG coverage, 2021 (% of live births) **</b>     | 2434/2525 (96.4%)                                | 839/888 (94.5%)                                         | 3273/3413<br>(95.9%)     |
| <b>Leprosy new cases, 2020 (rate per 10,000) **</b> | 93 (14.44)                                       | 62 (11.15)                                              | 155 (12.92)              |

|                                       |            |            |              |
|---------------------------------------|------------|------------|--------------|
| - <b>Child cases (%)</b>              | 18 (19.4%) | 18 (29.0%) | 36 (23.2%)   |
| - <b>MB cases (%)</b>                 | 50 (53.8%) | 20 (32.3%) | 70 (45.2%)   |
| <b>Eligible contacts 2010–2020 **</b> | 9527       | 2264       | 11,811       |
| - <b>received SDR (%)</b>             | 8381 (88%) | 2021 (89%) | 10,402 (89%) |

Selected baseline characteristics or populations in the intervention area (South Tarawa), no intervention area (rest of Kiribati) and for the whole of Kiribati. BCG – Bacille Calmette-Guerin; MB – multibacillary; SDR – single-dose rifampicin.

\* *National Statistics Office, 2020 census data*

\*\* *Ministry of Health and Medical Services, programme data*

### Intervention group and recruitment

The intervention group comprises residents of South Tarawa (and the small communities of Buota and Abatao adjacent to South Tarawa) aged 3-years and above, and aged less than 3-years if they have documented household contact (relevant definitions are provided in **Box 1**) with someone who has had TB in the past 1 year, or leprosy at any time since they were born. Study participants will be identified via household and village-level lists of residents from the 2020 census, and then invited to attend screening locations using door-to-door visits at households and community-based institutions (businesses, churches, et cetera). Basic demographic, social and geographic data will be collected at enrolment by the PEARL study screening teams.

#### Box 1. Definitions

**Case of leprosy** – clinical definition classified as multibacillary (MB) or paucibacillary (PB) according to WHO criteria that has been diagnosed by the doctor of the NLP.

**Household** - all those using the same kitchen, including members of extended families, the Maneaba (communal hospitality shelters), and dormitories in individual locations.

**Household contact** - any person who has been in contact with a new leprosy case for at least 20 hours per week for at least three months during the past five years.\*

*\*adapted from WHO definition for the Kiribati context*

## Interventions

An illustration of the combined TB and leprosy interventions is provided in **Figure 1**, comparing the intervention group and standard care in the comparison group. Interventions are described in detail below. In practice, these interventions will be delivered in the setting of a combined community-based screening, diagnosis, treatment and prevention service.

### *Case detection, diagnosis and treatment*

Screening for leprosy will be conducted by a physical examination and questionnaire (**Supplement 1**). People with presumptive leprosy will be referred to the National Leprosy Program (NLP) for expert diagnosis. Cases will be validated by a leprologist and skin biopsies from all patients with clinically diagnosed leprosy will be tested by PCR for *M. leprae* and drug resistance mutations, according to WHO guidelines.<sup>14</sup> Leprosy treatment will be provided by the NLP according to Kiribati national guidelines. Further details of the leprosy screening, diagnosis and treatment eligibility criteria are available in the PEARL study protocol.<sup>17</sup>

### *Contact Tracing and Post-Exposure Prophylaxis*

Contact tracing and SDR-PEP will be ongoing for all index cases identified during the intervention within the study site and throughout the rest of Kiribati, as is consistent with routine practice (**Box 1**). WHO recommends that leprosy contacts should be given SDR-PEP at  $\geq 2$  years of age.<sup>20</sup> This has been adopted by the Kiribati NLP since 2018 and will be supported by the COMBINE study to scale-up SDR-PEP delivery throughout the intervention period, as enhanced index case detection will increase contact tracing needs. Children who are younger than 2-years and are leprosy contacts will be followed up and offered SDR-PEP by the NLP when they reach 2 years of age.

### *Leprosy Mass Drug Administration Chemoprophylaxis*

Rifamycin-based MDA chemoprophylaxis is provided using a composite of treatments. After integrated leprosy and TB screening, participants will be commenced on treatment for TB, treatment for leprosy, or TPT using a rifamycin-based regimen, depending on the screening outcome. For participants who are not eligible for any of those treatments, we will then offer a single dose of rifampicin according to the inclusion/exclusion criteria in **Table 2**. Considered together as in **Table 3**, all participants will be offered a rifamycin-based treatment; effectively a rifamycin-based leprosy MDA chemoprophylaxis. Detailed dosing information is provided in **Supplement 2**. SDR for PEP and MDA will be provided without baseline blood tests, consistent with the standard of care in Kiribati.

**Table 2.** Inclusion and exclusion criteria for single dose rifampicin

| Inclusion criteria                                                                                                                                                                                                                                                                              | Exclusion criteria                                                                                                                                                                                                  |
|-------------------------------------------------------------------------------------------------------------------------------------------------------------------------------------------------------------------------------------------------------------------------------------------------|---------------------------------------------------------------------------------------------------------------------------------------------------------------------------------------------------------------------|
| 1. Enrolled in the screening intervention<br>2. Not eligible for any other rifamycin-based treatment<br>3. Aged $\geq 2$ years<br>4. Informed consent. For children (<18 years) consent will be obtained from the parent or guardian, and children ( $\geq 10$ years) will also provide assent. | 1. History of serious liver or kidney disease.<br>2. Known pregnancy (SDR can be given after delivery).<br>3. Known allergy or severe adverse effects experienced with rifampicin use.<br>4. Refuses participation. |

Inclusion criteria are shown for single dose rifampicin. Other treatment regimens are determined by indications and contraindications relevant to those regimens. MDA – mass drug administration; SDR – single-dose rifampicin.

**Table 3.** Overview of combined treatment and chemoprophylaxis

| Screening outcome | Treatment offered | Rifamycin component                |
|-------------------|-------------------|------------------------------------|
| Leprosy           | Leprosy MDT       | Monthly rifampicin for 6-12 months |
| TB                | TB treatment      | Daily rifampicin for 6-12 months   |

|                   |                       |                                                     |
|-------------------|-----------------------|-----------------------------------------------------|
| RR-TB             | DR-TB treatment + SDR | Single dose rifampicin                              |
| Eligible for TPT  | 3HP or 3RH            | Weekly rifapentine or daily rifampicin for 3 months |
| Leprosy HHC       | SDR-PEP               | Rifampicin given at baseline and one year later     |
| None of the above | SDR-MDA               | Single dose of rifampicin                           |

Screening outcomes are exhaustive but not mutually exclusive. The rifamycin component of each treatment strategy includes sufficient exposure to offer prevention for leprosy, in effect a mass drug administration of leprosy chemoprophylaxis. 3HP – 3-months of weekly rifapentine and isoniazid; 3RH – 3-months of daily rifampicin and isoniazid; DR-TB – drug-resistant tuberculosis; HHC – household contact; MDA – mass drug administration; MDT – multi-drug treatment; NLP – national leprosy program; PCR – polymerase chain reaction; PEP – post-exposure prophylaxis; RR-TB – rifampicin-resistant tuberculosis; SDR – single-dose rifampicin; TB – tuberculosis; TPT – tuberculosis preventive treatment.

### *Community Engagement and Stigma Prevention*

The objective of community engagement and mass communications is to encourage participation in the screening programme and sensitise community members to appropriate, non-stigmatising messages related to leprosy and leprosy screening. This approach is supported by the best practice statement of the Global Partnership for Zero Leprosy.<sup>11 21</sup> The COMBINE study supports community engagement and stigma prevention through various activities developed in concert with the PLF (who have 10 years of experience in leprosy advocacy in Kiribati) and the MHMS. These activities include:

- bi-annual advocacy activity drives which may include leprosy awareness parades, plays, signage and mass communication.
- convening of a leprosy community support group for patients diagnosed with leprosy and their close contacts/families. COMBINE nurses will assist with mentoring the community group, training in coping strategies and supporting activities.



- annual training and development workshops including all staff of the national leprosy and TB programmes with anti-stigma training for health staff delivering the COMBINE screening intervention
- job-aids and resources to support health staff and people with leprosy, for example a flipbook to aid counselling sessions between health workers and people with leprosy

#### *Post-intervention prevalence survey*

A follow-up leprosy prevalence survey will be conducted in Betio islet (~18,500 people, located within the South Tarawa intervention group) 3-4 years after the intervention there has been completed.

#### **Outcome measures and planned analyses**

The primary research question of interest is the extent to which the intervention reduces leprosy annual adult & child NCDR compared with standard routine passive case-finding and post-exposure prophylaxis of close contacts. This will be assessed 1) by comparing the post-intervention NCDRs in South Tarawa (in 2025) with the pre-intervention NCDRs (in 2021) and 2) by comparing the change in adult & child NCDRs in South Tarawa (the intervention site) with the change in NCDRs observed in the outer Kiribati islands (non-intervention sites). A supplementary analysis will compare the prevalence rate of leprosy in Betio (~15,000 people) found in the initial population-wide screening intervention with the rate found from a survey in the same population performed 3-4 years later. All primary, supplementary and planned analyses will be performed using standard statistical methods, for example using Poisson regression for the NCDR outcomes and logistic regression to compare prevalence during and after the intervention.

Due to the long latency of leprosy, we expect that the full effect of the intervention will only become apparent after several years have elapsed. MHMS and PLF are committed to

1  
2 continuing leprosy surveillance in Kiribati, enabling ongoing assessments of long-term trends  
3  
4 in disease burden beyond 2025.  
5  
6  
7  
8

9 Other planned analyses will examine:

- 10  
11 1. Diagnostic yield of leprosy screening using an optimised clinical examination and brief  
12 history in the setting of a community-based multi-disease screening intervention.  
13 Examinations of yield amongst discrete age bands in children (0-4, 5-9, 10-14 years)  
14 will also indicate effect of the intervention on transmission over time.  
15  
16
- 17 2. Description of the spectrum of leprosy disease in South Tarawa.  
18
- 19 3. Description of leprosy clusters and transmission patterns using geospatial data and  
20 social contact mapping  
21  
22
- 23 4. The prevalence ratio of genotypic *M. leprae* resistance to rifampicin, dapsone and  
24 quinolones before and after the MDA programme (using PCR-based assays of skin  
25 biopsies) <sup>22-25</sup>  
26  
27
- 28 5. The costs of leprosy-only activities, TB-only activities and shared activities to inform the  
29 cost-efficiency of future combined leprosy elimination projects in the Pacific and  
30 elsewhere  
31  
32
- 33 6. The relative risk of leprosy diagnosis in participants with and without prior exposure to  
34 rifamycins (provided as part of routine activities of the NLP and NTP), prior BCG  
35 vaccination and prior TB infection and/or disease in a high-incidence setting  
36  
37
- 38 7. The feasibility of combined TB and leprosy elimination efforts in the intervention site  
39 assessed using a mixed methods approach: measurement of treatment coverage,  
40 description of health service requirements (health care worker mix and person-time),  
41 description of infrastructure requirements, and surveys and interviews conducted with  
42 healthcare workers, decision makers, community representatives and study  
43 participants.  
44  
45  
46  
47  
48  
49  
50  
51  
52  
53  
54  
55  
56  
57  
58  
59  
60

- 1  
2  
3 8. Mathematical modelling of the dynamics of leprosy incidence using 'real life' data from  
4 the COMBINE study with the aim of refining previous models<sup>18</sup> to improve accuracy of  
5 forecasting and decision support  
6  
7  
8  
9

### 10 11 **Sample size**

12  
13 Assuming mass chemoprophylaxis coverage of 80% of the population and given an overall  
14 leprosy NCDR of 1600/1,000,000 for South Tarawa (the intervention group, population  
15 ~65,000) and 872 per 1,000,000 for the rest of the country (comparison group, population  
16 ~55,000), the study would provide greater than 99% power ( $\alpha \leq 0.05$ ) to detect a 50% reduction  
17 (before versus after difference) in NCDR in South Tarawa (the intervention group) and 82%  
18 power to detect a 50% reduction in South Tarawa compared with no change in the rest of the  
19 country. Predicted sample sizes were calculated using the mean number of cases observed  
20 between 2018 and 2020 and simulated number of cases observed in 2025, drawn from a  
21 Poisson distribution (10,000 replicates) according to the parameters above and assuming a  
22 population growth of 5,000 in each area.  
23  
24  
25  
26  
27  
28  
29  
30  
31  
32  
33  
34  
35

### 36 37 **Economic analysis and costing**

38 COMBINE proposes to estimate unit costs for screening per patient, working closely with the  
39 PEARL study to perform a cost analysis of TB-only activities, leprosy-only activities and  
40 shared activities. Accurate costing data will inform future leprosy elimination projects in the  
41 Pacific region and beyond, and will have additional benefits for subsequent planning,  
42 budgeting and modelling exercises. To enhance the application of our findings, we will seek  
43 to align costing data with existing interagency costing tools.  
44  
45  
46  
47  
48  
49  
50  
51  
52

### 53 54 **Data collection and monitoring**

55 All leprosy and TB screening, chemoprophylaxis and outcome data will be captured offline on  
56 encrypted tablet devices using Research Electronic Data Capture (REDCap) surveys. Data  
57 will be uploaded and stored on a high security REDCap database server managed by the  
58  
59  
60

1  
2  
3 University of Sydney. Leprosy case and contact management data are already archived in a  
4 comprehensive NLP database, with maintenance supported by the PLF before, during and  
5 after the study. We will contribute case and contact data from the COMBINE study to the  
6 existing supported database through routine study procedures. Mass screening and MDA data  
7 will be available to NLP as needed and handed over to the NLP after study completion.  
8  
9  
10  
11  
12  
13  
14

### 15 **Post-study follow-up activities**

16  
17 Country-wide ACF and PEP for household contacts will continue beyond the COMBINE study  
18 as a joint-program implemented by the NLP and the PLF. We consider that the early findings  
19 of the present study will enable mobilisation of funds to deliver similar population-wide leprosy  
20 control activities in other parts of the country, as part of a 'Zero Leprosy Roadmap'. Case and  
21 contact management records are already maintained in a comprehensive database, and  
22 relevant data from the COMBINE study will be added as part of study procedures. Together  
23 with mass screening data, this will provide a rich source for future analysis of long term  
24 outcomes in the study population.  
25  
26  
27  
28  
29  
30  
31  
32  
33  
34  
35

### 36 **ETHICS AND DISSEMINATION**

37  
38 Ethical approval for the COMBINE study has been obtained from the University of Sydney  
39 (project no. 2021/127), the University of Otago (H22/111) and the Kiribati Ministry of Health  
40 and Medical Services. Government support for the study to occur in collaboration with the NLP  
41 has been provided by Kiribati National Cabinet.  
42  
43  
44  
45  
46  
47  
48

49 Participant information and counselling is provided to all prospective participants and again  
50 before treatment is offered (**Supplement 3**). Editable versions of study patient tools and a  
51 counselling flipbook are available at [www.leprosy.org.nz](http://www.leprosy.org.nz) and [www.thepearlstudy.org](http://www.thepearlstudy.org).  
52 Informed consent is gathered verbally before participant enrolment and a signed record of  
53 consent is collected in the study REDCap database (**Supplement 4**). Verbal consent for  
54 participants attending the NLP for confirmation of diagnosis and treatment management will  
55  
56  
57  
58  
59  
60

1  
2  
3 be obtained according to standard programme practice. Written informed consent for a skin  
4  
5 biopsy will be taken as is usual in the clinic. This includes consent to send the specimen  
6  
7 abroad for analysis.  
8  
9

10  
11 The safety of treatments for TB are discussed in the PEARL study protocol.<sup>17</sup> SDR is very  
12  
13 safe, and has been used in Kiribati<sup>18 19</sup> and elsewhere<sup>12 26-28</sup> with little or no recorded side-  
14  
15 effects. A study hotline and walk-in clinic will be freely available for adverse event (AE)  
16  
17 management throughout the study period. Information on the signs and symptoms of leprosy  
18  
19 and instructions to access the permanent leprosy clinic are provided to all participants  
20  
21 (including those who decline to participate). Serious AEs are reported in accordance with  
22  
23 national and University of Sydney pharmacovigilance standards. Intervention monitoring and  
24  
25 auditing procedures will be conducted annually by the MHMS in accordance with routine  
26  
27 practice with study reports made annually to ethics and funding bodies.  
28  
29  
30

31  
32 All study data will be shared with the MHMS. Reports of study progress will be made to the  
33  
34 Kiribati community by mass communication and on the Pacific Leprosy Foundation and the  
35  
36 PEARL study websites. Study findings will be presented at international conferences and in  
37  
38 peer reviewed publications.  
39  
40  
41

#### 42 *Patient Involvement Statement*

43  
44 This study was developed with the involvement of a reference group of I-Kiribati people  
45  
46 affected by leprosy. This group will be involved in the COMBINE study in an ongoing basis. In  
47  
48 particular, they will give advice concerning the practical implementation of the research,  
49  
50 including the best ways of liaising with patients, their families and the community to ensure  
51  
52 that communication is positive and does not contribute to stigma for people identified with  
53  
54 leprosy and their contacts.  
55  
56  
57  
58

#### 59 **DISCUSSION**

1  
2  
3 Innovative solutions are required to achieve progress towards leprosy elimination in Kiribati  
4 and in other areas of continuing high incidence. This is essential if we are to overcome the  
5 barriers to achieving global Zero Leprosy targets,<sup>11</sup> and eventually, true global leprosy  
6 elimination. As leprosy continues to require long and complex treatment programs, there is  
7 also urgency to find novel control strategies before antibiotic resistance emerges and  
8 accelerates in high transmission populations.<sup>29</sup>  
9  
10  
11  
12  
13  
14  
15  
16

17 The proposed study design combines a robust public health intervention in response to the  
18 dual epidemics of leprosy and TB in Kiribati, along with rigorous evaluation of the intervention.  
19 Population-wide leprosy active case-finding and MDA with rifamycin-based chemoprophylaxis  
20 in a population of approximately 60,000 represents a bold step towards acceleration of leprosy  
21 control. Combining this intervention with a similar population-wide TB screening, treatment  
22 and prevention programme is an innovative health systems approach that could improve  
23 efficiency and feasibility of large-scale interventions for both diseases. If successful, this would  
24 present an important model that may be implemented in other settings.  
25  
26  
27  
28  
29  
30  
31  
32  
33  
34  
35

36 There are several limitations associated with this study protocol that may affect outcomes.  
37 First, the population wide screening and mass drug administration intervention in this study is  
38 in essence a change in health policy whereby the target population is expanded to include all  
39 residents of South Tarawa, rather than just specific contacts or groups of individuals. As with  
40 any health policy change or community-facing intervention, the impact of this new approach  
41 is dependent on the new policy reaching a large proportion of the target population and being  
42 delivered with high fidelity to the proposed design. We will take every effort to achieve high  
43 uptake and retention in care by conducting extensive community mobilisation and health  
44 communication activities. Although the outcomes of this study are defined at population level  
45 (NCDR measured before and after) and not dependent on individual level enrolment and  
46 withdrawal, we will also maintain detailed individual level records to enhance follow-up.  
47 Second, the intervention is not randomised. This will limit our ability to make inferences about  
48  
49  
50  
51  
52  
53  
54  
55  
56  
57  
58  
59  
60

1  
2  
3 causation, especially if the impact on NCDR is small. We hope that by including the rest of the  
4  
5 country as a non-randomised 'control' group we will have some basis for comparison. Finally,  
6  
7 the proposed combined approach to screening and prevention means that the intervention is  
8  
9 more time consuming to deliver and will take longer to reach the entire target population. We  
10  
11 anticipate some level of reinfection to occur in already-screened areas of South Tarawa, while  
12  
13 we continue to deliver the intervention across the island. Although reinfections may reduce  
14  
15 the impact on measured NCDR, we anticipate that this would still be valuable information since  
16  
17 we are taking a 'real world' public health approach that could serve as an example to other  
18  
19 settings.  
20  
21  
22

23  
24 In Kiribati (and elsewhere<sup>12,30</sup>), MDA chemoprophylaxis in the 1990s led to reductions in  
25  
26 leprosy case detection but ultimately failed to produce a lasting decline in incidence in some  
27  
28 settings. The long latency period of the disease and the absence of surrogate measures of  
29  
30 leprosy transmission make robust short-to-medium-term outcome measures of the population-  
31  
32 level effect of interventions particularly limited. These are challenges intrinsic to population-  
33  
34 level leprosy research. This study is designed to address these challenges by rigorous  
35  
36 evaluation of scaled-up interventions in combination with durable partnership for evaluation of  
37  
38 longer-term incidence and transmission outcomes. This 'real-life' operational research design  
39  
40 to evaluate the main intervention is accompanied by a commitment by the MHMS together  
41  
42 with the PLF to deliver leprosy control activities over the longer term, until leprosy is eliminated  
43  
44 in Kiribati ([www.leprosy.org.nz](http://www.leprosy.org.nz)); this includes surveillance, continuation of rigorous contact  
45  
46 identification and management, and expansion of population-wide screening and mass drug  
47  
48 administration to the rest of the country. In the shorter and medium term, improvements in the  
49  
50 accuracy of modelling of the intervention impact (using data from the COMBINE study) will  
51  
52 provide useful insights and interim measures of the effect of COMBINE interventions upon  
53  
54 leprosy incidence. This will be valuable to inform programs facing similar challenges to Kiribati.  
55  
56 The present study, along with short, medium and long term aims and commitments are  
57  
58 currently being integrated using a 'Leprosy elimination roadmap', adapting the methods and  
59  
60

1  
2  
3 experiences of the Global Partnership for Zero Leprosy. By embedding this study within long-  
4  
5 term strategic partnerships, with ongoing funding and a comprehensive strategy, we hope that  
6  
7 the missteps of previous MDA interventions can be avoided and lasting impact can be  
8  
9 achieved along with research outputs that will guide future interventions.<sup>19</sup>  
10

11  
12  
13 Kiribati is in a unique position, given its geographic isolation, low migration rate and limited  
14  
15 population size, to identify and test innovative elimination strategies as proof-of-principle for  
16  
17 leprosy control in other locations. We plan to grasp this opportunity and deliver much-needed  
18  
19 evidence to reinvigorate attempts to eliminate this age-old scourge of humankind.  
20  
21  
22  
23  
24  
25  
26  
27  
28  
29  
30  
31  
32  
33  
34  
35  
36  
37  
38  
39  
40  
41  
42  
43  
44  
45  
46  
47  
48  
49  
50  
51  
52  
53  
54  
55  
56  
57  
58  
59  
60



**Correspondence to:**

Prof Stephen T Chambers  
*Pacific Leprosy Foundation,*  
*4 Anderson Street, Addington,*  
*Private Bag 4730,*  
*Christchurch 8024, New Zealand;*  
*and University of Otago,*  
*Christchurch, New Zealand.*  
[Steve.chambers@otago.ac.nz](mailto:Steve.chambers@otago.ac.nz)

**Contributors**

All authors contributed to the conceptualisation and panning of this research. MC, JH, NMD, JT, JW, BMJ, WJB and STC wrote the study proposal. ET, ER, TB, NI, AC, NMD, TI, POC and PP made important intellectual contributions to the final protocol manuscript. MC and JH contributed equally to this paper. The funding agency played no part in any aspect of the study, nor the decision to submit this manuscript for publication.

**Acknowledgements**

We thank the chair of the Leprosy Reference Group in Kiribati, Ms Nanoo Maribo, for her support of the COMBINE study and the Kiribati National Leprosy Program for their outstanding contributions to this work. We thank Ms Kantaake Corbett, Kiribati Health Information Unit, Ms Aritita Tekaieti, Kiribati National Statistics Office, and Mr Luis de la Rua, Pacific Community Statistics for Development Division, for their assistance with baseline data.

**Funding**

The COMBINE study is funded by the Leprosy Research Initiative with 50% co-funding from the Turing foundation. Additional funding to support the collaborating National Leprosy Program is provided by the Pacific Leprosy Foundation, New Zealand. This work is a partnership with the PEARL study which is funded by the Australian Medical Research Future Fund (APP1200755).

**Competing interests' statement**

1  
2  
3 Some project funding is provided by the Pacific Leprosy Foundation, which also supports consultancy  
4 work of co-authors AC and NI.  
5  
6  
7  
8  
9  
10  
11  
12  
13  
14  
15  
16  
17  
18  
19  
20  
21  
22  
23  
24  
25  
26  
27  
28  
29  
30  
31  
32  
33  
34  
35  
36  
37  
38  
39  
40  
41  
42  
43  
44  
45  
46  
47  
48  
49  
50  
51  
52  
53  
54  
55  
56  
57  
58  
59  
60

For peer review only

### Figure 1. Overview of COMBINE study intervention

Overview of COMBINE study activities, comparing interventions delivered in South Tarawa (pink, intervention group) and in the rest of Kiribati (green, no intervention group). Activities are further divided according to those available at baseline across the country and continued during the study period, and those activities that will be delivered during the study period (vertical arrows at right). Geographical context is illustrated at top (not to scale). 3HP – three months of weekly isoniazid and rifapentine; 3RH – three months of daily isoniazid and rifampicin; ACF – active case finding; DST – drug susceptibility testing; MDA – mass drug administration; MDT – multi-drug treatment; NLP – national leprosy program; PCR – polymerase chain reaction; PEP – post-exposure prophylaxis; SDR – single-dose rifampicin; TB – tuberculosis; TPT – TB preventive treatment.

## REFERENCES

1. Resolution to eliminate leprosy as a public health problem by the year 2000 resolution  
WHA449. World Health Assembly: Geneva: 44th World Health Assembly, 1991.
2. WHO. World Health Organization leprosy elimination project: status report 2002: World  
Health Organization, 2003.
3. WHO. World Health Organization Global leprosy (Hansen disease) update, 2020: impact  
of COVID-19 on global leprosy control. *Weekly Epidemiology Record*  
2021;96(36):421-44.
4. Urgesa K, Bobosha K, Seyoum B, et al. Evidence for hidden leprosy in a high leprosy-  
endemic setting, Eastern Ethiopia: The application of active case-finding and contact  
screening. *PLoS neglected tropical diseases* 2021;15(9):e0009640.
5. Bernardes F, Paula NAd, Leite MN, et al. Evidence of hidden leprosy in a supposedly low  
endemic area of Brazil. *Memórias do Instituto Oswaldo Cruz* 2017;112:822-28.
6. Smith WC, van Brakel W, Gillis T, et al. The missing millions: a threat to the elimination of  
leprosy. *PLoS neglected tropical diseases* 2015;9(4):e0003658.
7. de Oliveira GL, Oliveira JF, Pescarini JM, et al. Estimating underreporting of leprosy in  
Brazil using a Bayesian approach. *PLoS Neglected Tropical Diseases*  
2021;15(8):e0009700.
8. Frade MAC, de Paula NA, Gomes CM, et al. Unexpectedly high leprosy seroprevalence  
detected using a random surveillance strategy in midwestern Brazil: A comparison of  
ELISA and a rapid diagnostic test. *PLoS Neglected Tropical Diseases*  
2017;11(2):e0005375.
9. Mangeard-Lourme J, Singh A, Singh RK, et al. Enhanced active case-finding, identifying  
leprosy cases missed by recent detection campaigns in Munger District, Bihar, India.  
*Leprosy Review* 2017;88(4):452-62.
10. Salgado CG, Barreto JG, da Silva MB, et al. Are leprosy case numbers reliable? *The  
Lancet Infectious Diseases* 2018;18(2):135-37.

- 1  
2  
3 11. WHO. World Health Organization Towards zero leprosy. Global leprosy (Hansen's  
4  
5 Disease) strategy 2021–2030. 2021
- 6  
7 12. Tiwari A, Dandel S, Djupuri R, et al. Population-wide administration of single dose  
8  
9 rifampicin for leprosy prevention in isolated communities: a three year follow-up  
10  
11 feasibility study in Indonesia. *BMC Infectious Diseases* 2018;18(1):324. doi:  
12  
13 10.1186/s12879-018-3233-3 [published Online First: 2018/07/13]
- 14  
15 13. Bakker MI, Hatta M, Kwenang A, et al. Prevention of leprosy using rifampicin as  
16  
17 chemoprophylaxis. *The American Journal of Tropical Medicine and Hygiene*  
18  
19 2005;72(4):443-48.
- 20  
21 14. WHO. World Health Organization consolidated guidelines on tuberculosis Module 2:  
22  
23 Screening – Systematic screening for tuberculosis diseases. *Global Tuberculosis*  
24  
25 *Programme* 2021
- 26  
27 15. WHO. Rapid communication on systematic screening for tuberculosis. 2020
- 28  
29 16. Marks GB, Nguyen NV, Nguyen PTB, et al. Community-wide Screening for Tuberculosis  
30  
31 in a High-Prevalence Setting. *New England Journal of Medicine* 2019;381(14):1347-  
32  
33 57. doi: 10.1056/NEJMoa1902129 [published Online First: 2019/10/03]
- 34  
35 17. Coleman M, Hill J, Timeon E, et al. Population-wide active case finding and prevention  
36  
37 for tuberculosis and leprosy elimination in Kiribati: the PEARL study protocol. *BMJ*  
38  
39 *Open* 2022;12(4):e055295. doi: 10.1136/bmjopen-2021-055295
- 40  
41 18. Gilkison C, Chambers S, Blok DJ, et al. Predicting the impact of household contact and  
42  
43 mass chemoprophylaxis on future new leprosy cases in South Tarawa, Kiribati: A  
44  
45 modelling study. *PLoS Neglected Tropical Diseases* 2019;13(9):e0007646. doi:  
46  
47 10.1371/journal.pntd.0007646 [published Online First: 2019/09/21]
- 48  
49 19. Chambers ST, Ioteba N, Timeon E, et al. Surveillance of Leprosy in Kiribati, 1935–2017.  
50  
51 *Emerging Infectious Diseases* 2020;26(5):833.
- 52  
53 20. WHO. Leprosy/Hansen disease: Contact tracing and post-exposure prophylaxis. 2020
- 54  
55 21. van Brakel WH, da Silva Pereira ZB, Barbosa JC, et al. Global Partnership for Zero  
56  
57 Leprosy Research Agenda Working Group Subgroup on Stigma, 2019.
- 58  
59  
60

- 1  
2  
3 22. Coppola M, van den Eeden SJ, Robbins N, et al. Vaccines for leprosy and tuberculosis:  
4 opportunities for shared research, development, and application. *Frontiers in*  
5 *Immunology* 2018;9:308.  
6  
7  
8  
9 23. Lahiri R, Adams LB. Cultivation and viability determination of *Mycobacterium leprae*.  
10 *International Textbook of Leprosy* 2016  
11  
12  
13 24. Davis GL, Ray NA, Lahiri R, et al. Molecular assays for determining *Mycobacterium*  
14 *leprae* viability in tissues of experimentally infected mice. *PLoS Neglected Tropical*  
15 *Diseases* 2013;7(8):e2404.  
16  
17  
18  
19 25. Williams DL, Torrero M, Wheeler PR, et al. Biological implications of *Mycobacterium*  
20 *leprae* gene expression during infection. *Microbial Physiology* 2004;8(1):58-72.  
21  
22  
23 26. Richardus JH, Tiwari A, Barth-Jaeggi T, et al. Leprosy post-exposure prophylaxis with  
24 single-dose rifampicin (LPEP): an international feasibility programme. *Lancet Global*  
25 *Health* 2021;9(1):e81-e90. doi: 10.1016/s2214-109x(20)30396-x [published Online  
26 First: 2020/11/02]  
27  
28  
29  
30  
31 27. Schoenmakers A, Mieras L, Budiawan T, et al. The State of Affairs in Post-Exposure  
32 Leprosy Prevention: A Descriptive Meta-Analysis on Immuno- and Chemo-  
33 Prophylaxis. *Research and Reports in Tropical Medicine* 2020;11:97-117. doi:  
34 10.2147/rrtm.S190300 [published Online First: 2020/10/30]  
35  
36  
37  
38  
39 40 28. Feenstra SG, Pahan D, Moet FJ, et al. Patient-related factors predicting the  
41 effectiveness of rifampicin chemoprophylaxis in contacts: 6 year follow up of the  
42 COLEP cohort in Bangladesh. *Leprosy Review* 2012;83(3):292-304. [published  
43 Online First: 2013/01/30]  
44  
45  
46  
47  
48 49 29. Cambau E, Saunderson P, Matsuoka M, et al. Antimicrobial resistance in leprosy: results  
50 of the first prospective open survey conducted by a WHO surveillance network for  
51 the period 2009–15. *Clinical Microbiology and Infection* 2018;24(12):1305-10.  
52  
53  
54  
55 56 30. Nguyen LN, Cartel JL, Grosset JH. Chemoprophylaxis of leprosy in the southern  
57 Marquesas with a single 25 mg/kg dose of rifampicin. Results after 10 years. *Leprosy*  
58  
59  
60

1  
2  
3  
4  
5  
6  
7  
8  
9  
10  
11  
12  
13  
14  
15  
16  
17  
18  
19  
20  
21  
22  
23  
24  
25  
26  
27  
28  
29  
30  
31  
32  
33  
34  
35  
36  
37  
38  
39  
40  
41  
42  
43  
44  
45  
46  
47  
48  
49  
50  
51  
52  
53  
54  
55  
56  
57  
58  
59  
60

*Review* 2000;71 Suppl:S33-5; discussion S35-6. doi: 10.5935/0305-7518.20000064

[published Online First: 2001/02/24]

For peer review only



Figure 1. Overview of COMBINE study intervention. Overview of COMBINE study activities, comparing interventions delivered in South Tarawa (pink, intervention group) and in the rest of Kiribati (green, no intervention group). Activities are further divided according to those available at baseline across the country and continued during the study period, and those activities that will be delivered during the study period (vertical arrows at right). Geographical context is illustrated at top (not to scale). 3HP – three months of weekly isoniazid and rifapentine; 3RH – three months of daily isoniazid and rifampicin; ACF – active case finding; DST – drug susceptibility testing; MDA – mass drug administration; MDT – multi-drug treatment; NLP – national leprosy program; PCR – polymerase chain reaction; PEP – post-exposure prophylaxis; SDR – single-dose rifampicin; TB – tuberculosis; TPT – TB preventive treatment.

536x758mm (67 x 67 DPI)



## Supplementary Materials

*The effectiveness of population-wide screening and mass drug administration for leprosy control in Kiribati: The COMBINE protocol*

SUPPLEMENTARY FIGURE 1:



### Supplementary Figure 1. Timeline of COMBINE study activities

Formal COMBINE activities commenced in July 2022 and should conclude in June 2026, with data analysis and dissemination of outcomes included in this period. Left-facing arrow indicates activity which began prior to the COMBINE study. Right-facing arrows indicate activities which will continue beyond the end of the COMBINE study through NLP and PLF activities, provided adequate funding is procured. NLP – National leprosy program; NTP – National tuberculosis program; PEP – post-exposure prophylaxis; SDR – single-dose rifampicin; TPT – tuberculosis preventive treatment. *\*TB and leprosy disease also excluded*

## SUPPLEMENT 1. Leprosy screening Standard Operating Procedure

### Population leprosy screening – general steps

1. Ask about leprosy (this may be done at a history taking station)
2. Conduct a physical check for leprosy
3. Record findings in CRF
  - a. Take a photo of any examination findings
4. Refer for further evaluation if there are any findings (this may be within the screening clinic, or to the leprosy clinic, depending on staffing)

### Population leprosy screening – details

#### Ask (this may be done at a history taking station)

- Have you had or do you have leprosy? Have you ever been treated for leprosy?
- Are you a household contact\* of someone who has had leprosy?
- Are you worried you might have leprosy? If so, why?
- Do you have any skin lesions or other abnormalities that you think could be leprosy?

#### Exposure

- Remove footwear and any outer layers of clothing

#### Areas of body to inspect

- Face including eyelashes, eyebrows, nose and mouth
- Ears
- Neck
- Arms and hands
- Legs and feet
- Lift the shirt and lower the waistband for back and upper buttocks

#### Looking for

- Skin lesions (pale, red, thick, raised, shiny)
  - Check if itchy, if so, don't refer to NLP (consider alternative referral if concerning)
- Skin nodules
- Altered shape of nose or ears
- Loss of eyelashes or eyebrows
- Altered shape of hand or foot
  - Check if present from birth, if so, don't refer
- Ulcers on hand or foot

#### Who to refer?

- People with physical examination findings consistent with leprosy
- People who are worried they might have leprosy (any reason)

#### How to record

- Fill the CRF
- Take a photo (good lighting, ruler or TST syringe for scale)
- Refer for further evaluation (this may be within the screening clinic, or to the leprosy clinic, depending on staffing)
- Give referral letter if needed

\* Household contact is defined according to WHO. *“Household contacts: contacts living in the same dwelling or sharing the same kitchen as the index case. These include family members but also domestic staff or aids or co-workers or others sharing the same accommodation. A family member living elsewhere should not be considered as a contact.”*

## SUPPLEMENT 2.

**Table S1.** Single dose rifampicin (SDR) chemoprophylaxis dosing.

| Age/body weight                          | Rifampicin<br>dose | single |
|------------------------------------------|--------------------|--------|
| 15 years and above                       | 600 mg             |        |
| 10-14 years                              | 450 mg             |        |
| Children 6-9 years (weight $\geq$ 20 kg) | 300 mg             |        |
| Children 6-9 years (weight $<$ 20 kg)    | 150 mg             |        |
| Children $<$ 5 years                     | 10-15 mg/kg        |        |

**Table S2.** Tuberculosis preventive treatment dosing.

**S2A.** 12 doses of weekly isoniazid (H) and rifapentine (P) for adults and children  $\geq$ 25 kg

| Weight band                    | HP (300mg/300mg) tablets |
|--------------------------------|--------------------------|
| 25-30kg<br>(or $<$ 15ys)       | 2                        |
| $\geq$ 30kg<br>and $\geq$ 15ys | 3                        |

**S2B.** 3 months of daily dosing of child-friendly water-dispersible rifampicin (R) and isoniazid (H) tablets for children  $<$ 25kg

| Weight band | RH (75mg/50mg) tablets |
|-------------|------------------------|
| 4-7kg       | 1                      |
| 8-11kg      | 2                      |
| 12-15kg     | 3                      |
| 16-25kg     | 4                      |

### SUPPLEMENT 3. Participant Information

## PARTICIPANT INFORMATION

### Finding and preventing TB and leprosy cases in Tarawa

#### Dear participant,

We would like to invite you (and your child if relevant) to be treated for latent or sleeping TB.

This document provides information about the study, but we will also explain the study to you in person. You will have the opportunity to ask questions if there is anything that you do not understand or if you want more information. You may refuse participation and this will not be held against you or affect any future access to healthcare.

#### What is this study about?

TB is a disease caused by germs that are coughed into the air by someone who is ill with TB. Most people who are infected with the TB germ do not become ill and do not even know that they are infected, this is referred to as latent or 'sleeping' TB. **Sometimes sleeping TB can wake up and make you ill, which may spread the germ to others.** This research aims to treat all people with TB, those who are ill and those with sleeping TB, so that we can try to eliminate TB from Tarawa. At the same time we are also trying to eliminate leprosy from Tarawa.

This Participant Information Form tells you about the study so that you can know what it involves. Please read this sheet carefully and ask questions about anything that you don't understand or want to know more about.

#### Who is conducting the study?

The study is carried out by researchers at the University of Sydney, Australia, in close collaboration with the Kiribati National TB and Leprosy Programme (NTP). The study is funded by the Australian Medical Research Future Fund and fully supported by the Kiribati Ministry of Health.

### **What will happen?**

This study involves screening for TB (both 'sleeping TB' and illness caused by TB) and leprosy. People who are ill with TB or leprosy will be referred to the TB and Leprosy Programme for appropriate treatment. People with 'sleeping TB' will be offered TB preventive treatment (TPT) and those without any illness or TB infection will be offered leprosy preventive prophylaxis.

To check if someone is able to be given medication for sleeping TB, a study nurse will ask some personal questions. This may include questions about previous and current illnesses, medications used, drinking of alcohol or kava, and questions about pregnancy if you are a woman. Every person older than 20 years will be given a rapid test to see if they have hepatitis B infection, which is important for us to know before considering treatment for 'sleeping TB'. This test involves a finger prick to get a small drop of blood. People with risk factors will need to have a small amount of blood drawn to make sure their liver function stays healthy during the time that they are treated for sleeping TB.

### **How much of my time will the study take?**

We will try to waste as little of your time as possible. To complete the TB and leprosy screening will require you (and your whole household) to be seen on two separate days. This is to complete all the necessary documentation and tests. It is expected that this will take about 2-3 hours of your time on each of these days. Those diagnosed with sleeping TB will need to take tablets once a week for 12 weeks. Tablets will be given out at the mobile health clinic on a monthly basis and can be collected between 9am and 4pm on weekdays.

### **Who can take part in the study?**

Every person older than 3 years of age living in Tarawa and Betio islet is invited to take part.

### **Do I have to be in the study? Can I withdraw from the study once I've started?**

1  
2  
3 Taking part in this study is strongly recommended by the Kiribati Ministry of Health and Medical  
4 Services (MHMS) to get rid of TB and leprosy across Tarawa. However, participation is  
5 completely voluntary and you do not have to take part. Your decision will not affect your current  
6 or future relationship with the researchers, the Kiribati National TB and leprosy Program or the  
7 Ministry of Health.  
8  
9  
10  
11  
12

13 If you decide to take part in the study and then change your mind later, you are free to withdraw  
14 at any time. You can do this by visiting the study clinic and speaking with a study nurse who  
15 will give you exit information and advice on how to stay healthy from TB in the future.  
16  
17  
18

19 If you decide to withdraw from the study, we will not collect any further information from you.  
20 Information that we have already collected will be kept in our study records and may be  
21 included in the study results.  
22  
23  
24  
25

### 26 **Are there any costs or risks associated with being in the study?**

27 There are no costs associated with study participation. Mobile study clinics will be  
28 conveniently situated to be easily accessible and all study tests or treatment will be funded by  
29 the study.  
30  
31  
32  
33

34 If treatment for 'sleeping TB' is provided it is normal to feel a bit tired and to have bright orange  
35 urine while you are taking the tablets. Rarely people may develop some of the symptoms  
36 below, in which case it is important to inform us immediately. Rare symptoms to look out for  
37 include:  
38  
39  
40  
41  
42

- 43 • ongoing nausea, vomiting or loss of appetite
  - 44 • new rash or itchy skin
  - 45 • yellowing skin or eyes
  - 46 • tingling or numbness in fingers or toes
  - 47 • any other symptoms of concern to you
- 48  
49  
50  
51  
52  
53  
54  
55  
56  
57  
58  
59  
60



1  
2  
3 Study nurses and doctors are available Monday to Friday, 9am to 4pm to see anyone who is  
4 feeling sick and thinks this may be due to their treatment. You may also call the 24-hour  
5 treatment hotline using the number on the back of your treatment card (TPT passport).  
6  
7  
8

9  
10 **Are there any benefits associated with being in the study?**

11 Yes, there are major benefits to yourself and the wider community of Tarawa, including Betio  
12 islet  
13

- 14 • You (and your child) will get treatment for TB or leprosy if required
- 15 • You (and your child) will get treatment for sleeping TB (TPT) or to keep  
16 leprosy away
- 17 • You will help to eliminate TB and leprosy from Tarawa
- 18 • Study results will help other Pacific Island nations to eliminate TB and  
19 leprosy in the future
- 20
- 21
- 22
- 23
- 24
- 25
- 26
- 27
- 28
- 29
- 30

31 **What if I have a complaint or any concerns about the study?**

32 This research has been reviewed by an independent group of people called a Human  
33 Research Ethics Committee (HREC) at the University of Sydney and the Kiribati Ministry of  
34 Health and Medical Services.  
35  
36  
37

38 If you are concerned about the way this study is being conducted please inform the study  
39 team; we want to learn and hear how we can improve things. If you wish to make a complaint  
40 to someone independent then please contact any of the people listed below.  
41  
42  
43

44 Terotia Tabwaka Kelese, Human Resource Officer, Republic of Kiribati

45 **Email:** [ttabwaka@gmail.com](mailto:ttabwaka@gmail.com)

46 or

47 The Manager, Ethics Administration, University of Sydney:

48 **Telephone:** +61 2 8627 8176

49 **Email:** [human.ethics@sydney.edu.au](mailto:human.ethics@sydney.edu.au)

50 **Fax:** +61 2 8627 8177 (Facsimile)

## Ethical Approval

This research plan (protocol) was approved by the ethics committee of the faculty of medicine and health at the University of Sydney. This helps to ensure that we do everything possible to keep you safe and to respect your rights and privacy at all times.

## We thank you for your time and cooperation.

The PEARL Research Team with the support of the Kiribati National TB and Leprosy Control Programmes. Further information can be found at [www.thepearlstudy.org](http://www.thepearlstudy.org)

## On behalf of the Kiribati Health Secretary

.....

## SUPPLEMENT 4. Informed Consent Form

**INFORMED CONSENT PROCESS FORM**

**Date of informed consent**   Today D-M-Y

**Does the participant have capacity to consent?**

Yes

No - young person <18 years of age

No - disability

No - other reason reset

**Name of Consenting Guardian**

**Relationship of consenting guardian**

parent

spouse

grandparent

aunt/uncle

sibling

other relative

non-relative guardian reset

**Does the participant assent to participate in the study?**

Yes

No reset

**Does the participant/primary caregiver agree to participate in study?**

Yes

No reset

**Can participant/caregiver read Kiribati?**

Yes

No reset

**Can participant/caregiver read English?**

Yes

No reset

**Participant information given and all participant questions answered?**

Yes

No reset

**Participant is aware that this is a public health intervention endorsed and supported by the Kiribati Ministry of Health and Medical Services?**

Yes

No reset

**Participant is aware that screen may involve providing sputum or blood samples?**

1. Yes/ Yes

0. No/ No reset

**Date & Time Participant/caregiver signed documentation of consent**    Now D-M-Y H:M

**Sign**

 [Add signature](#)

**Other comments**



## Mass drug administration for leprosy control in Kiribati: The COMBINE protocol

SPIRIT 2013 Checklist: Recommended items to address in a clinical trial protocol and related documents\*

| Section/item                      | Item No | Description                                                                                                                                                                                                                                                                              | Addressed on page number |
|-----------------------------------|---------|------------------------------------------------------------------------------------------------------------------------------------------------------------------------------------------------------------------------------------------------------------------------------------------|--------------------------|
| <b>Administrative information</b> |         |                                                                                                                                                                                                                                                                                          |                          |
| Title                             | 1       | Descriptive title identifying the study design, population, interventions, and, if applicable, trial acronym                                                                                                                                                                             | 1                        |
| Trial registration                | 2a      | Trial identifier and registry name. If not yet registered, name of intended registry                                                                                                                                                                                                     | NA not a trial           |
|                                   | 2b      | All items from the World Health Organization Trial Registration Data Set                                                                                                                                                                                                                 | NA not a trial           |
| Protocol version                  | 3       | Date and version identifier                                                                                                                                                                                                                                                              | 3                        |
| Funding                           | 4       | Sources and types of financial, material, and other support                                                                                                                                                                                                                              | 22                       |
| Roles and responsibilities        | 5a      | Names, affiliations, and roles of protocol contributors                                                                                                                                                                                                                                  | 1-2; 22                  |
|                                   | 5b      | Name and contact information for the trial sponsor                                                                                                                                                                                                                                       | 22                       |
|                                   | 5c      | Role of study sponsor and funders, if any, in study design; collection, management, analysis, and interpretation of data; writing of the report; and the decision to submit the report for publication, including whether they will have ultimate authority over any of these activities | 22                       |
|                                   | 5d      | Composition, roles, and responsibilities of the coordinating centre, steering committee, endpoint adjudication committee, data management team, and other individuals or groups overseeing the trial, if applicable (see Item 21a for data monitoring committee)                         | 18-19                    |

|    |                                                           |     |                                                                                                               |                  |
|----|-----------------------------------------------------------|-----|---------------------------------------------------------------------------------------------------------------|------------------|
| 1  | <b>Introduction</b>                                       |     |                                                                                                               |                  |
| 2  |                                                           |     |                                                                                                               |                  |
| 3  | Background and                                            | 6a  | Description of research question and justification for undertaking the trial, including summary of relevant   | 7-9              |
| 4  | rationale                                                 |     | studies (published and unpublished) examining benefits and harms for each intervention                        |                  |
| 5  |                                                           |     |                                                                                                               |                  |
| 6  |                                                           | 6b  | Explanation for choice of comparators                                                                         | 10               |
| 7  |                                                           |     |                                                                                                               |                  |
| 8  | Objectives                                                | 7   | Specific objectives or hypotheses                                                                             | 10               |
| 9  |                                                           |     |                                                                                                               |                  |
| 10 | Trial design                                              | 8   | Description of trial design including type of trial (eg, parallel group, crossover, factorial, single group), |                  |
| 11 |                                                           |     | allocation ratio, and framework (eg, superiority, equivalence, noninferiority, exploratory)                   | 10               |
| 12 |                                                           |     |                                                                                                               |                  |
| 13 |                                                           |     |                                                                                                               |                  |
| 14 | <b>Methods: Participants, interventions, and outcomes</b> |     |                                                                                                               |                  |
| 15 |                                                           |     |                                                                                                               |                  |
| 16 | Study setting                                             | 9   | Description of study settings (eg, community clinic, academic hospital) and list of countries where data will | 10-12            |
| 17 |                                                           |     | be collected. Reference to where list of study sites can be obtained                                          |                  |
| 18 |                                                           |     |                                                                                                               |                  |
| 19 | Eligibility criteria                                      | 10  | Inclusion and exclusion criteria for participants. If applicable, eligibility criteria for study centres and  | 13-14; table 2   |
| 20 |                                                           |     | individuals who will perform the interventions (eg, surgeons, psychotherapists)                               |                  |
| 21 |                                                           |     |                                                                                                               |                  |
| 22 | Interventions                                             | 11a | Interventions for each group with sufficient detail to allow replication, including how and when they will be | 12-14; figure 1; |
| 23 |                                                           |     | administered                                                                                                  | table 2          |
| 24 |                                                           |     |                                                                                                               |                  |
| 25 |                                                           | 11b | Criteria for discontinuing or modifying allocated interventions for a given trial participant (eg, drug dose  | 13; 18-19;       |
| 26 |                                                           |     | change in response to harms, participant request, or improving/worsening disease)                             | Supplement 2     |
| 27 |                                                           |     |                                                                                                               |                  |
| 28 |                                                           | 11c | Strategies to improve adherence to intervention protocols, and any procedures for monitoring adherence        | 12-15; 18-19     |
| 29 |                                                           |     | (eg, drug tablet return, laboratory tests)                                                                    |                  |
| 30 |                                                           |     |                                                                                                               |                  |
| 31 |                                                           | 11d | Relevant concomitant care and interventions that are permitted or prohibited during the trial                 | 12-15; 18-19; S2 |
| 32 |                                                           |     |                                                                                                               |                  |
| 33 | Outcomes                                                  | 12  | Primary, secondary, and other outcomes, including the specific measurement variable (eg, systolic blood       |                  |
| 34 |                                                           |     | pressure), analysis metric (eg, change from baseline, final value, time to event), method of aggregation (eg, | 16-18            |
| 35 |                                                           |     | median, proportion), and time point for each outcome. Explanation of the clinical relevance of chosen         |                  |
| 36 |                                                           |     | efficacy and harm outcomes is strongly recommended                                                            |                  |
| 37 |                                                           |     |                                                                                                               |                  |
| 38 | Participant timeline                                      | 13  | Time schedule of enrolment, interventions (including any run-ins and washouts), assessments, and visits for   | 10               |
| 39 |                                                           |     | participants. A schematic diagram is highly recommended (see Figure)                                          |                  |
| 40 |                                                           |     |                                                                                                               |                  |
| 41 |                                                           |     |                                                                                                               |                  |
| 42 |                                                           |     |                                                                                                               |                  |
| 43 |                                                           |     |                                                                                                               |                  |
| 44 |                                                           |     |                                                                                                               |                  |
| 45 |                                                           |     |                                                                                                               |                  |
| 46 |                                                           |     |                                                                                                               |                  |

|    |                                                                     |     |                                                                                                                                                                                                                                                                                                                                                                                                              |                        |
|----|---------------------------------------------------------------------|-----|--------------------------------------------------------------------------------------------------------------------------------------------------------------------------------------------------------------------------------------------------------------------------------------------------------------------------------------------------------------------------------------------------------------|------------------------|
| 1  | Sample size                                                         | 14  | Estimated number of participants needed to achieve study objectives and how it was determined, including clinical and statistical assumptions supporting any sample size calculations                                                                                                                                                                                                                        | 17                     |
| 2  |                                                                     |     |                                                                                                                                                                                                                                                                                                                                                                                                              |                        |
| 3  |                                                                     |     |                                                                                                                                                                                                                                                                                                                                                                                                              |                        |
| 4  | Recruitment                                                         | 15  | Strategies for achieving adequate participant enrolment to reach target sample size                                                                                                                                                                                                                                                                                                                          | 15                     |
| 5  |                                                                     |     |                                                                                                                                                                                                                                                                                                                                                                                                              |                        |
| 6  |                                                                     |     |                                                                                                                                                                                                                                                                                                                                                                                                              |                        |
| 7  | <b>Methods: Assignment of interventions (for controlled trials)</b> |     |                                                                                                                                                                                                                                                                                                                                                                                                              |                        |
| 8  | Allocation:                                                         |     |                                                                                                                                                                                                                                                                                                                                                                                                              |                        |
| 9  |                                                                     |     |                                                                                                                                                                                                                                                                                                                                                                                                              |                        |
| 10 | Sequence generation                                                 | 16a | Method of generating the allocation sequence (eg, computer-generated random numbers), and list of any factors for stratification. To reduce predictability of a random sequence, details of any planned restriction (eg, blocking) should be provided in a separate document that is unavailable to those who enrol participants or assign interventions                                                     | NA non-random          |
| 11 |                                                                     |     |                                                                                                                                                                                                                                                                                                                                                                                                              |                        |
| 12 |                                                                     |     |                                                                                                                                                                                                                                                                                                                                                                                                              |                        |
| 13 |                                                                     |     |                                                                                                                                                                                                                                                                                                                                                                                                              |                        |
| 14 |                                                                     |     |                                                                                                                                                                                                                                                                                                                                                                                                              |                        |
| 15 |                                                                     |     |                                                                                                                                                                                                                                                                                                                                                                                                              |                        |
| 16 | Allocation concealment mechanism                                    | 16b | Mechanism of implementing the allocation sequence (eg, central telephone; sequentially numbered, opaque, sealed envelopes), describing any steps to conceal the sequence until interventions are assigned                                                                                                                                                                                                    | NA population-wide     |
| 17 |                                                                     |     |                                                                                                                                                                                                                                                                                                                                                                                                              |                        |
| 18 |                                                                     |     |                                                                                                                                                                                                                                                                                                                                                                                                              |                        |
| 19 |                                                                     |     |                                                                                                                                                                                                                                                                                                                                                                                                              |                        |
| 20 | Implementation                                                      | 16c | Who will generate the allocation sequence, who will enrol participants, and who will assign participants to interventions                                                                                                                                                                                                                                                                                    | NA population-wide     |
| 21 |                                                                     |     |                                                                                                                                                                                                                                                                                                                                                                                                              |                        |
| 22 |                                                                     |     |                                                                                                                                                                                                                                                                                                                                                                                                              |                        |
| 23 |                                                                     |     |                                                                                                                                                                                                                                                                                                                                                                                                              |                        |
| 24 | Blinding (masking)                                                  | 17a | Who will be blinded after assignment to interventions (eg, trial participants, care providers, outcome assessors, data analysts), and how                                                                                                                                                                                                                                                                    | NA open-label          |
| 25 |                                                                     |     |                                                                                                                                                                                                                                                                                                                                                                                                              |                        |
| 26 |                                                                     |     |                                                                                                                                                                                                                                                                                                                                                                                                              |                        |
| 27 |                                                                     | 17b | If blinded, circumstances under which unblinding is permissible, and procedure for revealing a participant's allocated intervention during the trial                                                                                                                                                                                                                                                         | NA open-label          |
| 28 |                                                                     |     |                                                                                                                                                                                                                                                                                                                                                                                                              |                        |
| 29 |                                                                     |     |                                                                                                                                                                                                                                                                                                                                                                                                              |                        |
| 30 |                                                                     |     |                                                                                                                                                                                                                                                                                                                                                                                                              |                        |
| 31 | <b>Methods: Data collection, management, and analysis</b>           |     |                                                                                                                                                                                                                                                                                                                                                                                                              |                        |
| 32 |                                                                     |     |                                                                                                                                                                                                                                                                                                                                                                                                              |                        |
| 33 | Data collection methods                                             | 18a | Plans for assessment and collection of outcome, baseline, and other trial data, including any related processes to promote data quality (eg, duplicate measurements, training of assessors) and a description of study instruments (eg, questionnaires, laboratory tests) along with their reliability and validity, if known. Reference to where data collection forms can be found, if not in the protocol | 16-18;<br>Supplement 1 |
| 34 |                                                                     |     |                                                                                                                                                                                                                                                                                                                                                                                                              |                        |
| 35 |                                                                     |     |                                                                                                                                                                                                                                                                                                                                                                                                              |                        |
| 36 |                                                                     |     |                                                                                                                                                                                                                                                                                                                                                                                                              |                        |
| 37 |                                                                     |     |                                                                                                                                                                                                                                                                                                                                                                                                              |                        |
| 38 |                                                                     |     |                                                                                                                                                                                                                                                                                                                                                                                                              |                        |
| 39 |                                                                     | 18b | Plans to promote participant retention and complete follow-up, including list of any outcome data to be collected for participants who discontinue or deviate from intervention protocols                                                                                                                                                                                                                    | 18-19                  |
| 40 |                                                                     |     |                                                                                                                                                                                                                                                                                                                                                                                                              |                        |
| 41 |                                                                     |     |                                                                                                                                                                                                                                                                                                                                                                                                              |                        |
| 42 |                                                                     |     |                                                                                                                                                                                                                                                                                                                                                                                                              |                        |
| 43 |                                                                     |     |                                                                                                                                                                                                                                                                                                                                                                                                              |                        |
| 44 |                                                                     |     |                                                                                                                                                                                                                                                                                                                                                                                                              |                        |
| 45 |                                                                     |     |                                                                                                                                                                                                                                                                                                                                                                                                              |                        |
| 46 |                                                                     |     |                                                                                                                                                                                                                                                                                                                                                                                                              |                        |

1 Data management 19 Plans for data entry, coding, security, and storage, including any related processes to promote data quality 18  
 2 (eg, double data entry; range checks for data values). Reference to where details of data management  
 3 procedures can be found, if not in the protocol  
 4  
 5 Statistical methods 20a Statistical methods for analysing primary and secondary outcomes. Reference to where other details of the 16-18  
 6 statistical analysis plan can be found, if not in the protocol  
 7  
 8 20b Methods for any additional analyses (eg, subgroup and adjusted analyses) 16-18  
 9  
 10 20c Definition of analysis population relating to protocol non-adherence (eg, as randomised analysis), and any  
 11 statistical methods to handle missing data (eg, multiple imputation) 16-18  
 12  
 13  
 14 **Methods: Monitoring**  
 15  
 16 Data monitoring 21a Composition of data monitoring committee (DMC); summary of its role and reporting structure; statement of 18-19  
 17 whether it is independent from the sponsor and competing interests; and reference to where further details  
 18 about its charter can be found, if not in the protocol. Alternatively, an explanation of why a DMC is not  
 19 needed  
 20  
 21 21b Description of any interim analyses and stopping guidelines, including who will have access to these interim 18-19  
 22 results and make the final decision to terminate the trial  
 23  
 24  
 25 Harms 22 Plans for collecting, assessing, reporting, and managing solicited and spontaneously reported adverse 18-19  
 26 events and other unintended effects of trial interventions or trial conduct  
 27  
 28 Auditing 23 Frequency and procedures for auditing trial conduct, if any, and whether the process will be independent 19  
 29 from investigators and the sponsor  
 30  
 31  
 32 **Ethics and dissemination**  
 33  
 34 Research ethics 24 Plans for seeking research ethics committee/institutional review board (REC/IRB) approval 4-5  
 35 approval  
 36  
 37 Protocol 25 Plans for communicating important protocol modifications (eg, changes to eligibility criteria, outcomes, 18-19  
 38 amendments analyses) to relevant parties (eg, investigators, REC/IRBs, trial participants, trial registries, journals,  
 39 regulators)  
 40  
 41  
 42  
 43  
 44  
 45  
 46

|    |                               |     |                                                                                                                                                                                                                                                                                     |                |
|----|-------------------------------|-----|-------------------------------------------------------------------------------------------------------------------------------------------------------------------------------------------------------------------------------------------------------------------------------------|----------------|
| 1  | Consent or assent             | 26a | Who will obtain informed consent or assent from potential trial participants or authorised surrogates, and how (see Item 32)                                                                                                                                                        | 18-19; Table 2 |
| 2  |                               |     |                                                                                                                                                                                                                                                                                     |                |
| 3  |                               |     |                                                                                                                                                                                                                                                                                     |                |
| 4  |                               | 26b | Additional consent provisions for collection and use of participant data and biological specimens in ancillary studies, if applicable                                                                                                                                               | 18             |
| 5  |                               |     |                                                                                                                                                                                                                                                                                     |                |
| 6  |                               |     |                                                                                                                                                                                                                                                                                     |                |
| 7  | Confidentiality               | 27  | How personal information about potential and enrolled participants will be collected, shared, and maintained in order to protect confidentiality before, during, and after the trial                                                                                                | 18-19          |
| 8  |                               |     |                                                                                                                                                                                                                                                                                     |                |
| 9  |                               |     |                                                                                                                                                                                                                                                                                     |                |
| 10 | Declaration of interests      | 28  | Financial and other competing interests for principal investigators for the overall trial and each study site                                                                                                                                                                       | 22-23          |
| 11 |                               |     |                                                                                                                                                                                                                                                                                     |                |
| 12 |                               |     |                                                                                                                                                                                                                                                                                     |                |
| 13 | Access to data                | 29  | Statement of who will have access to the final trial dataset, and disclosure of contractual agreements that limit such access for investigators                                                                                                                                     | 18-19          |
| 14 |                               |     |                                                                                                                                                                                                                                                                                     |                |
| 15 |                               |     |                                                                                                                                                                                                                                                                                     |                |
| 16 | Ancillary and post-trial care | 30  | Provisions, if any, for ancillary and post-trial care, and for compensation to those who suffer harm from trial participation                                                                                                                                                       | NA             |
| 17 |                               |     |                                                                                                                                                                                                                                                                                     |                |
| 18 |                               |     |                                                                                                                                                                                                                                                                                     |                |
| 19 |                               |     |                                                                                                                                                                                                                                                                                     |                |
| 20 | Dissemination policy          | 31a | Plans for investigators and sponsor to communicate trial results to participants, healthcare professionals, the public, and other relevant groups (eg, via publication, reporting in results databases, or other data sharing arrangements), including any publication restrictions | 4-5            |
| 21 |                               |     |                                                                                                                                                                                                                                                                                     |                |
| 22 |                               |     |                                                                                                                                                                                                                                                                                     |                |
| 23 |                               |     |                                                                                                                                                                                                                                                                                     |                |
| 24 |                               | 31b | Authorship eligibility guidelines and any intended use of professional writers                                                                                                                                                                                                      | 22-23          |
| 25 |                               |     |                                                                                                                                                                                                                                                                                     |                |
| 26 |                               | 31c | Plans, if any, for granting public access to the full protocol, participant-level dataset, and statistical code                                                                                                                                                                     | NA             |
| 27 |                               |     |                                                                                                                                                                                                                                                                                     |                |
| 28 |                               |     |                                                                                                                                                                                                                                                                                     |                |
| 29 | <b>Appendices</b>             |     |                                                                                                                                                                                                                                                                                     |                |
| 30 |                               |     |                                                                                                                                                                                                                                                                                     |                |
| 31 | Informed consent materials    | 32  | Model consent form and other related documentation given to participants and authorised surrogates                                                                                                                                                                                  | Supplement 3-4 |
| 32 |                               |     |                                                                                                                                                                                                                                                                                     |                |
| 33 |                               |     |                                                                                                                                                                                                                                                                                     |                |
| 34 | Biological specimens          | 33  | Plans for collection, laboratory evaluation, and storage of biological specimens for genetic or molecular analysis in the current trial and for future use in ancillary studies, if applicable                                                                                      | 18             |
| 35 |                               |     |                                                                                                                                                                                                                                                                                     |                |
| 36 |                               |     |                                                                                                                                                                                                                                                                                     |                |

\*It is strongly recommended that this checklist be read in conjunction with the SPIRIT 2013 Explanation & Elaboration for important clarification on the items. Amendments to the protocol should be tracked and dated. The SPIRIT checklist is copyrighted by the SPIRIT Group under the Creative Commons [“Attribution-NonCommercial-NoDerivs 3.0 Unported”](https://creativecommons.org/licenses/by-nc-nd/3.0/) license.
